# Supplementary material for: Construction of phenoxazine rings containing nitro and sulfonic acid groups leading to phenoxazine-3-sulfonamide derivatives: their evaluation as novel and potential insulin secretagogues
Source: Royal Society of Chemistry journal article supplement (doi:10.1039/c3md00377a), 2014-01-01

## Spectra of Compounds

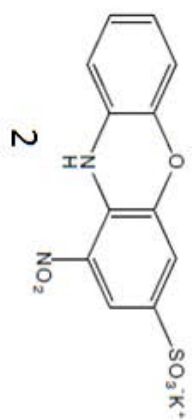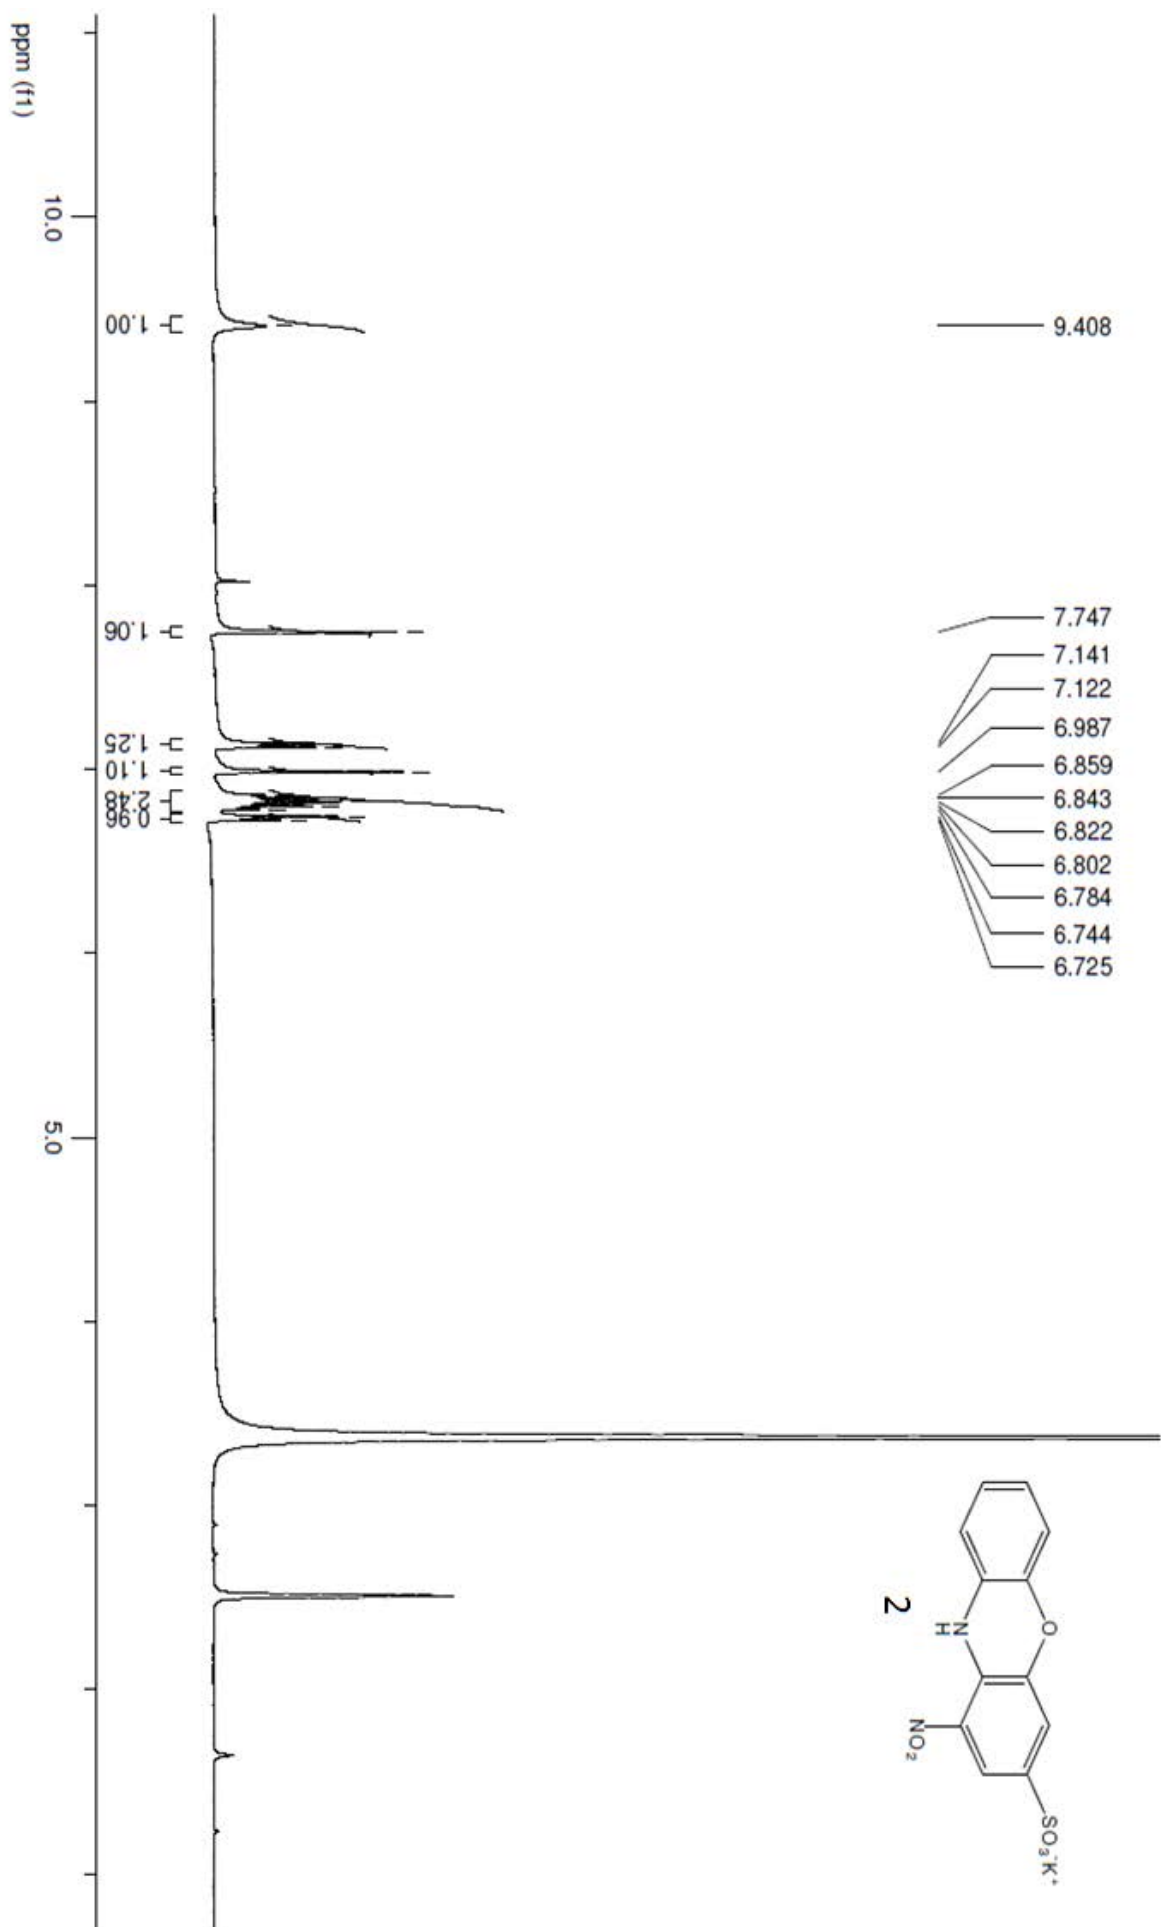

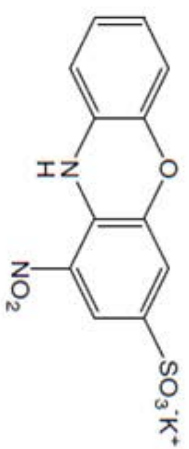

$^{13}\text{C}$ -NMR of compound 2

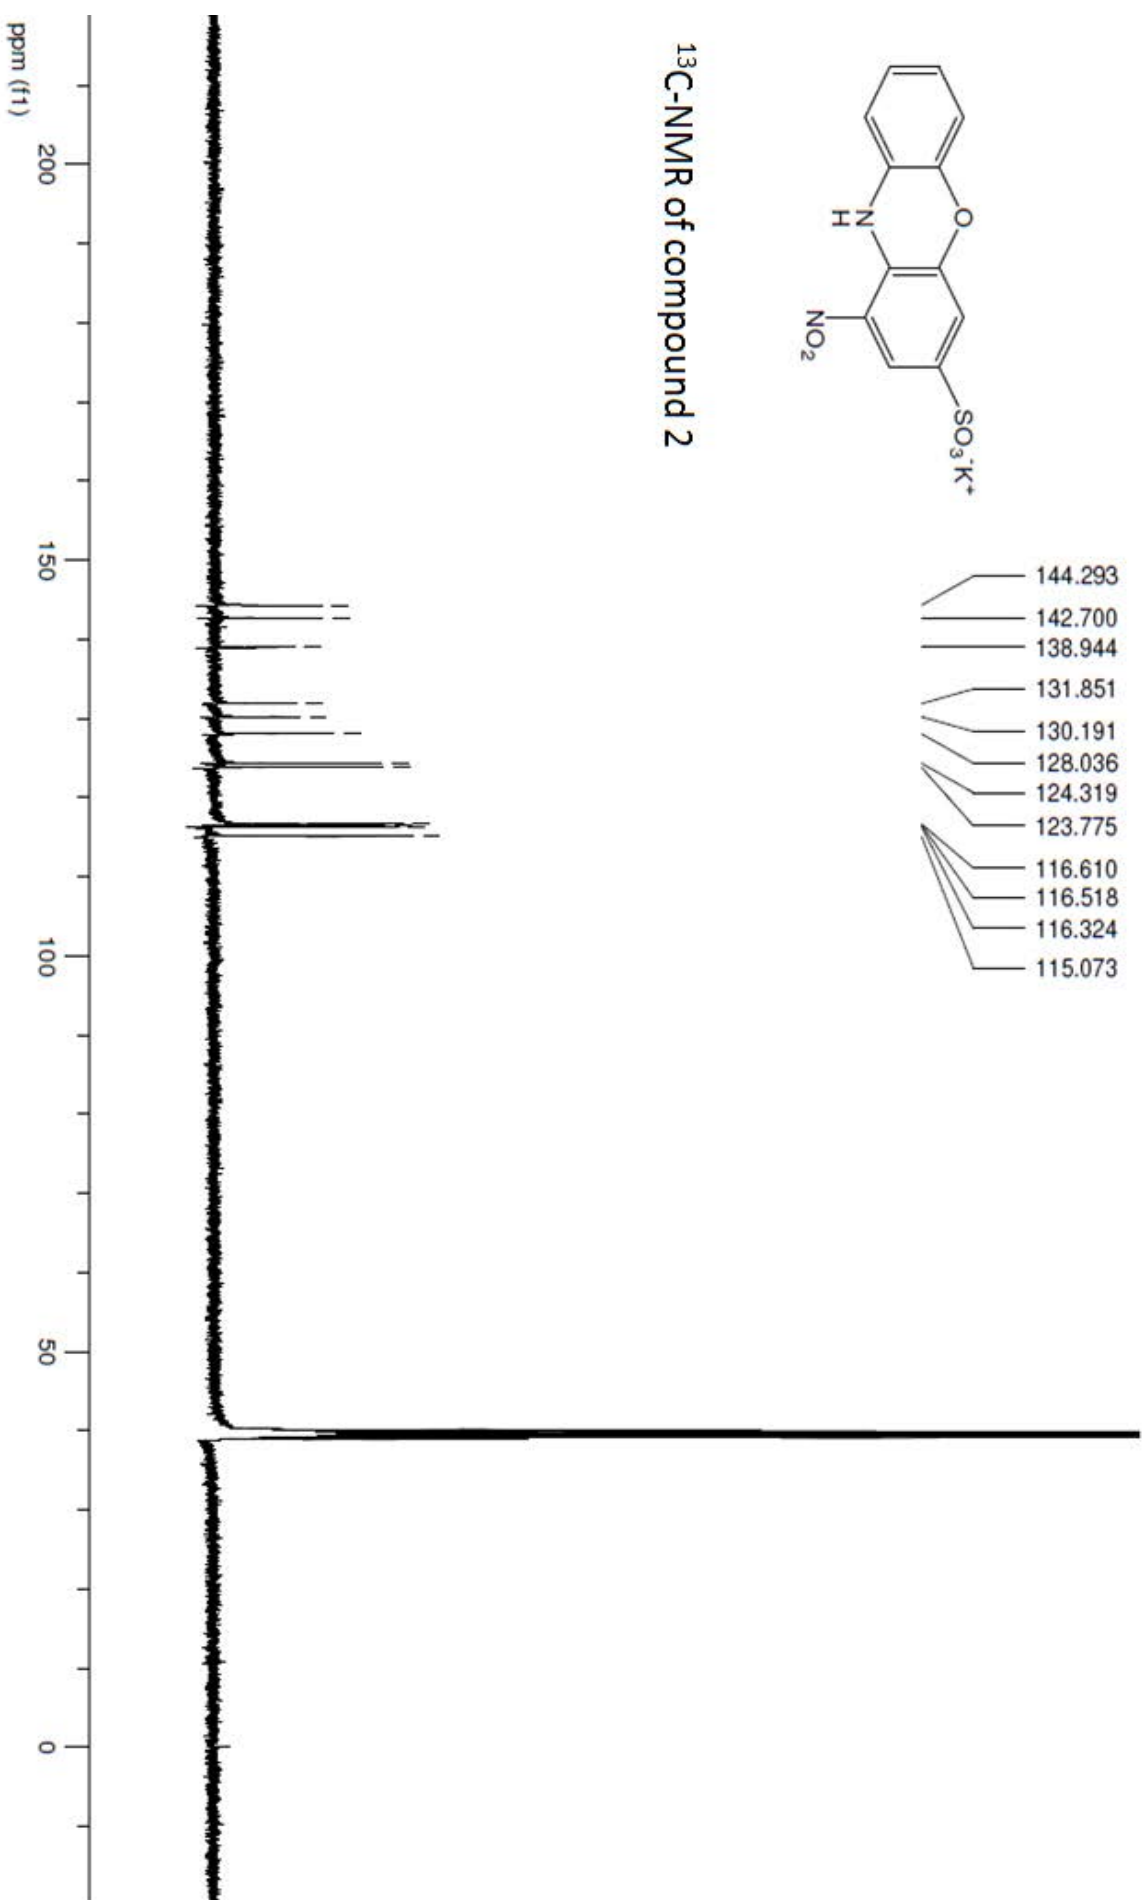

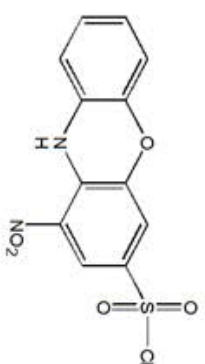

<sup>1</sup>H-NMR of compound 5

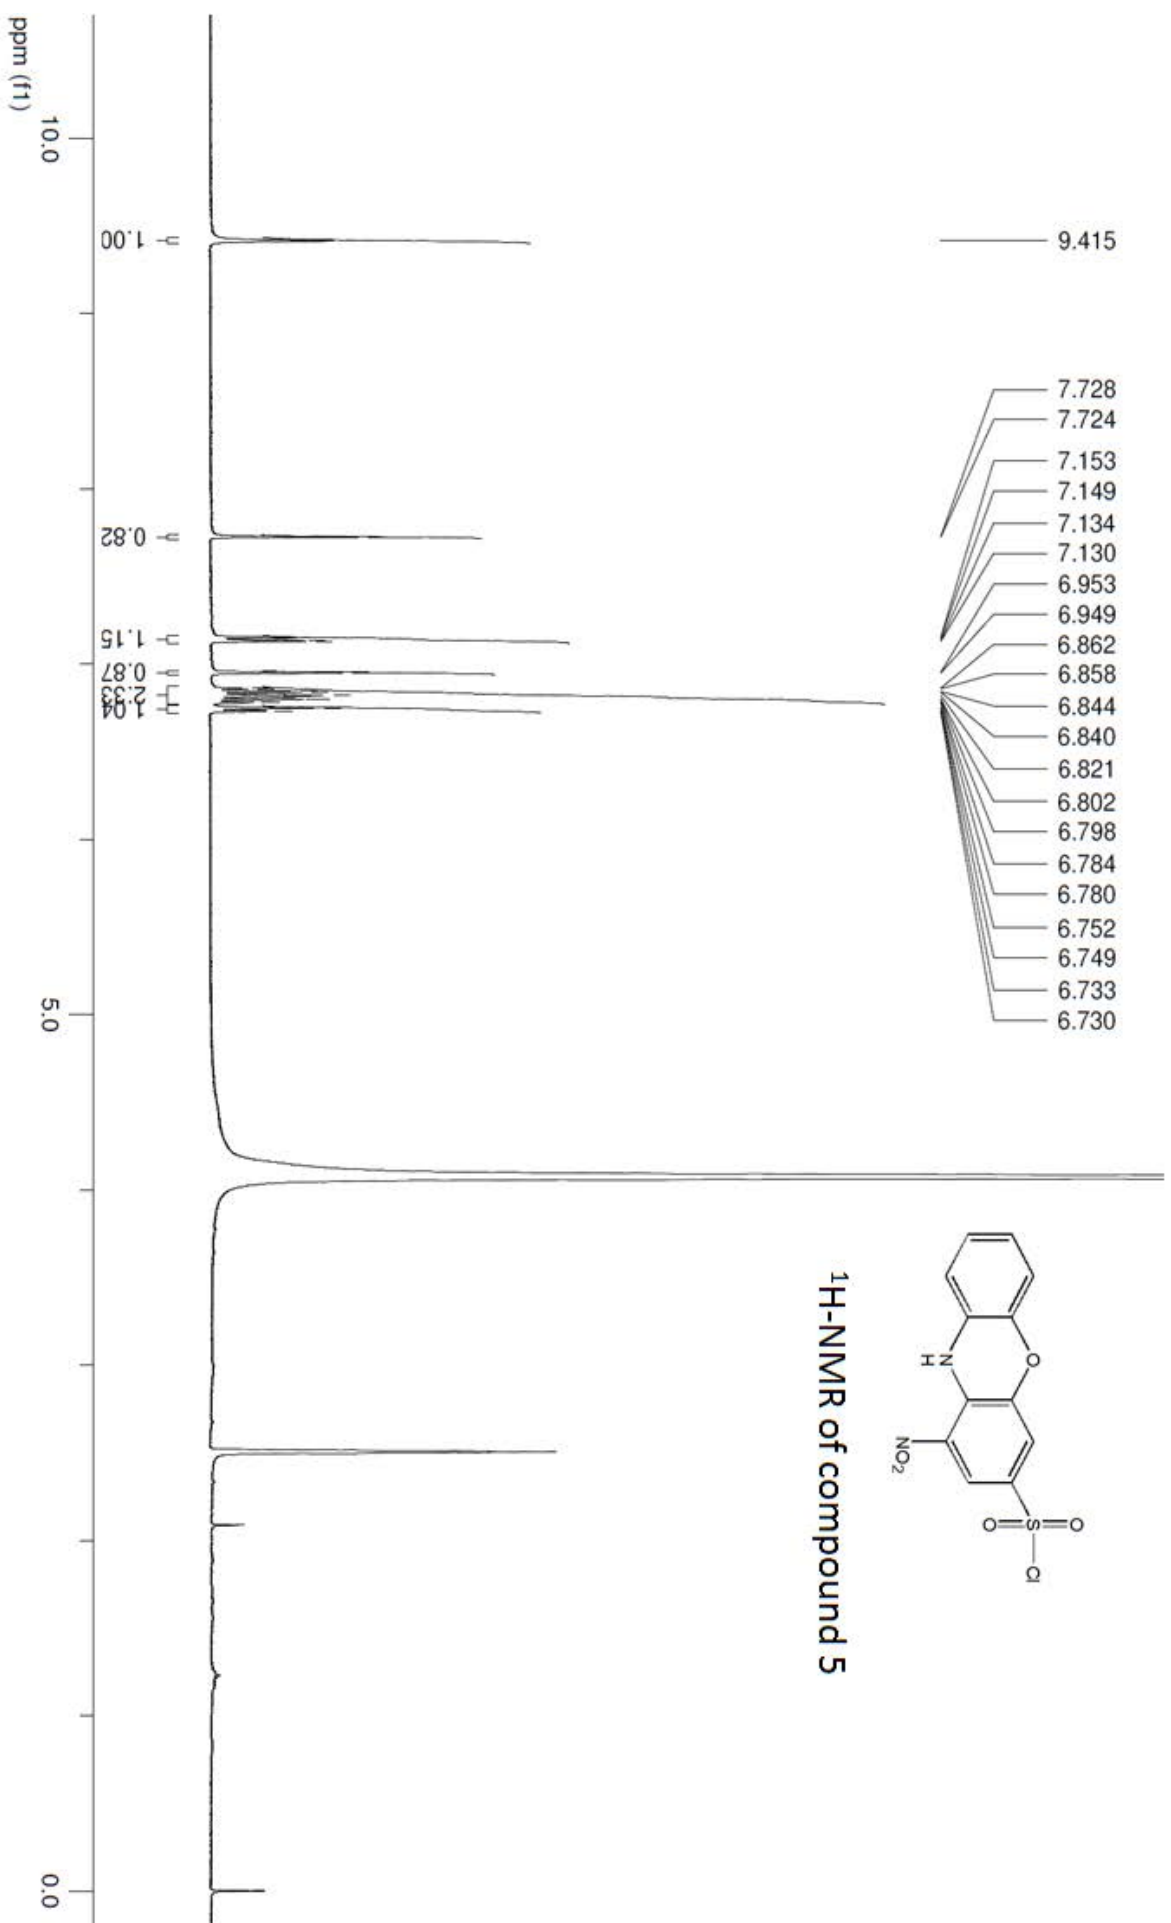

9.679  
7.915  
7.910  
7.435  
7.229  
7.209  
7.203  
7.191  
7.186  
7.129  
7.125  
6.895  
6.879  
6.875  
6.861  
6.856  
6.853  
6.845  
6.838  
6.834  
6.829  
6.815  
6.810  
6.752  
6.734  
6.729

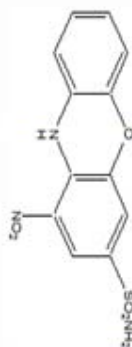

<sup>1</sup>H-NMR of compound 6a

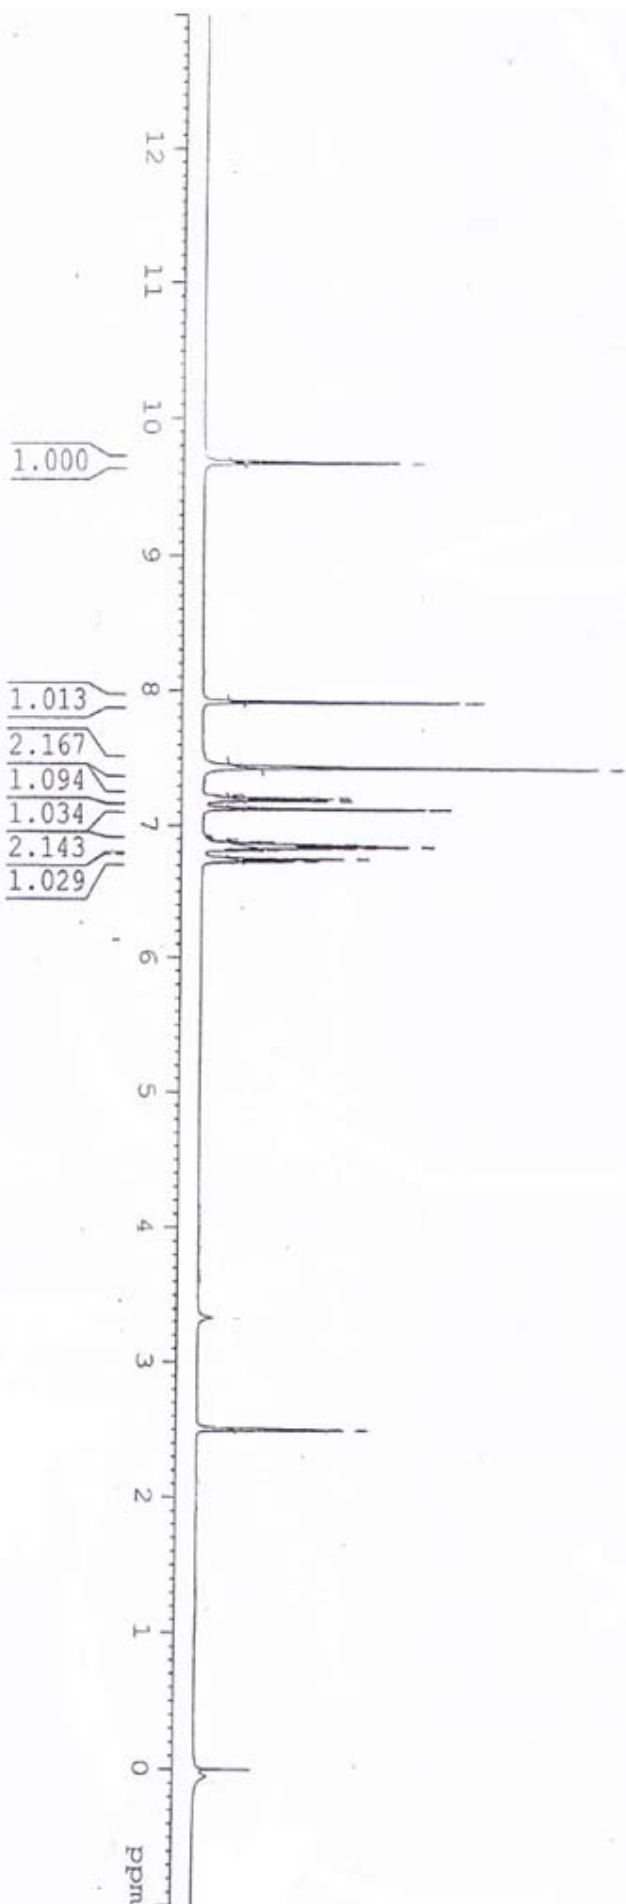

C1204-1066 BVK\SVR\1\1

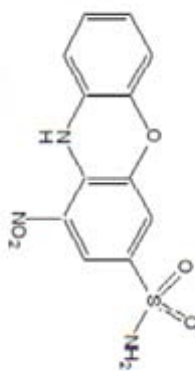

<sup>13</sup>C-NMR of compound 6a

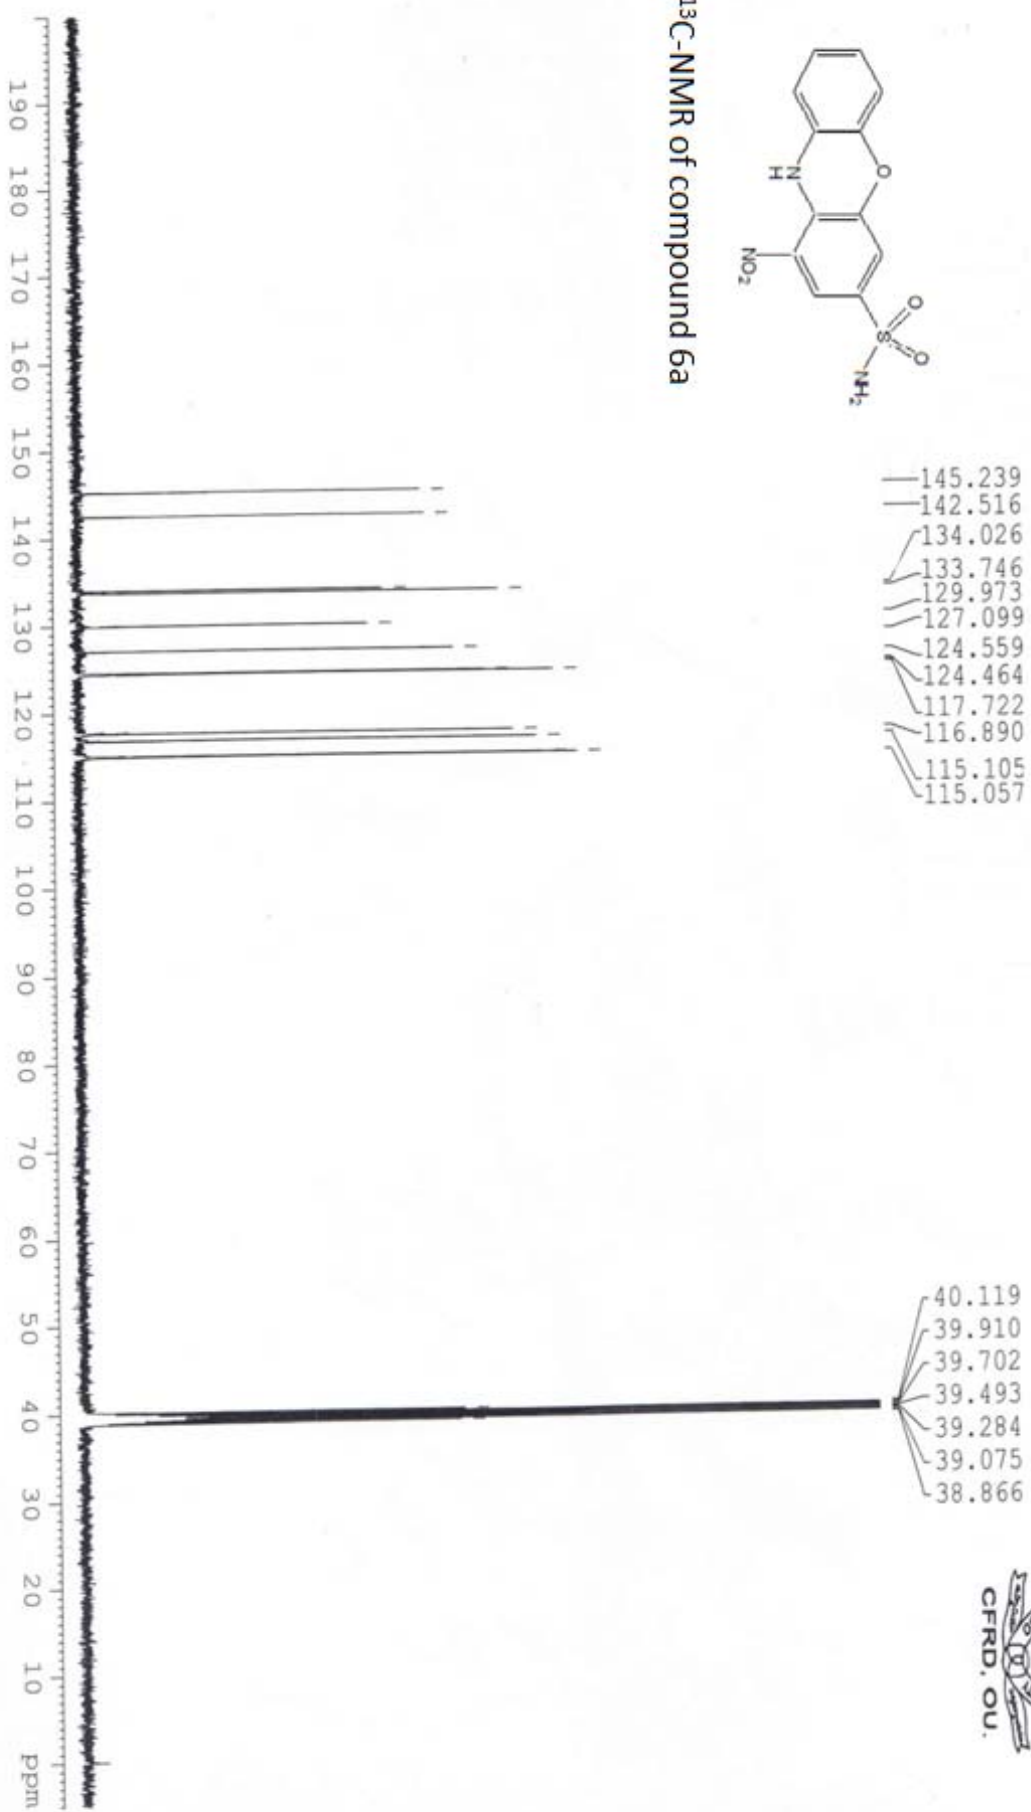

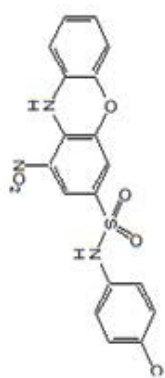

<sup>1</sup>H-NMR of compound 6b

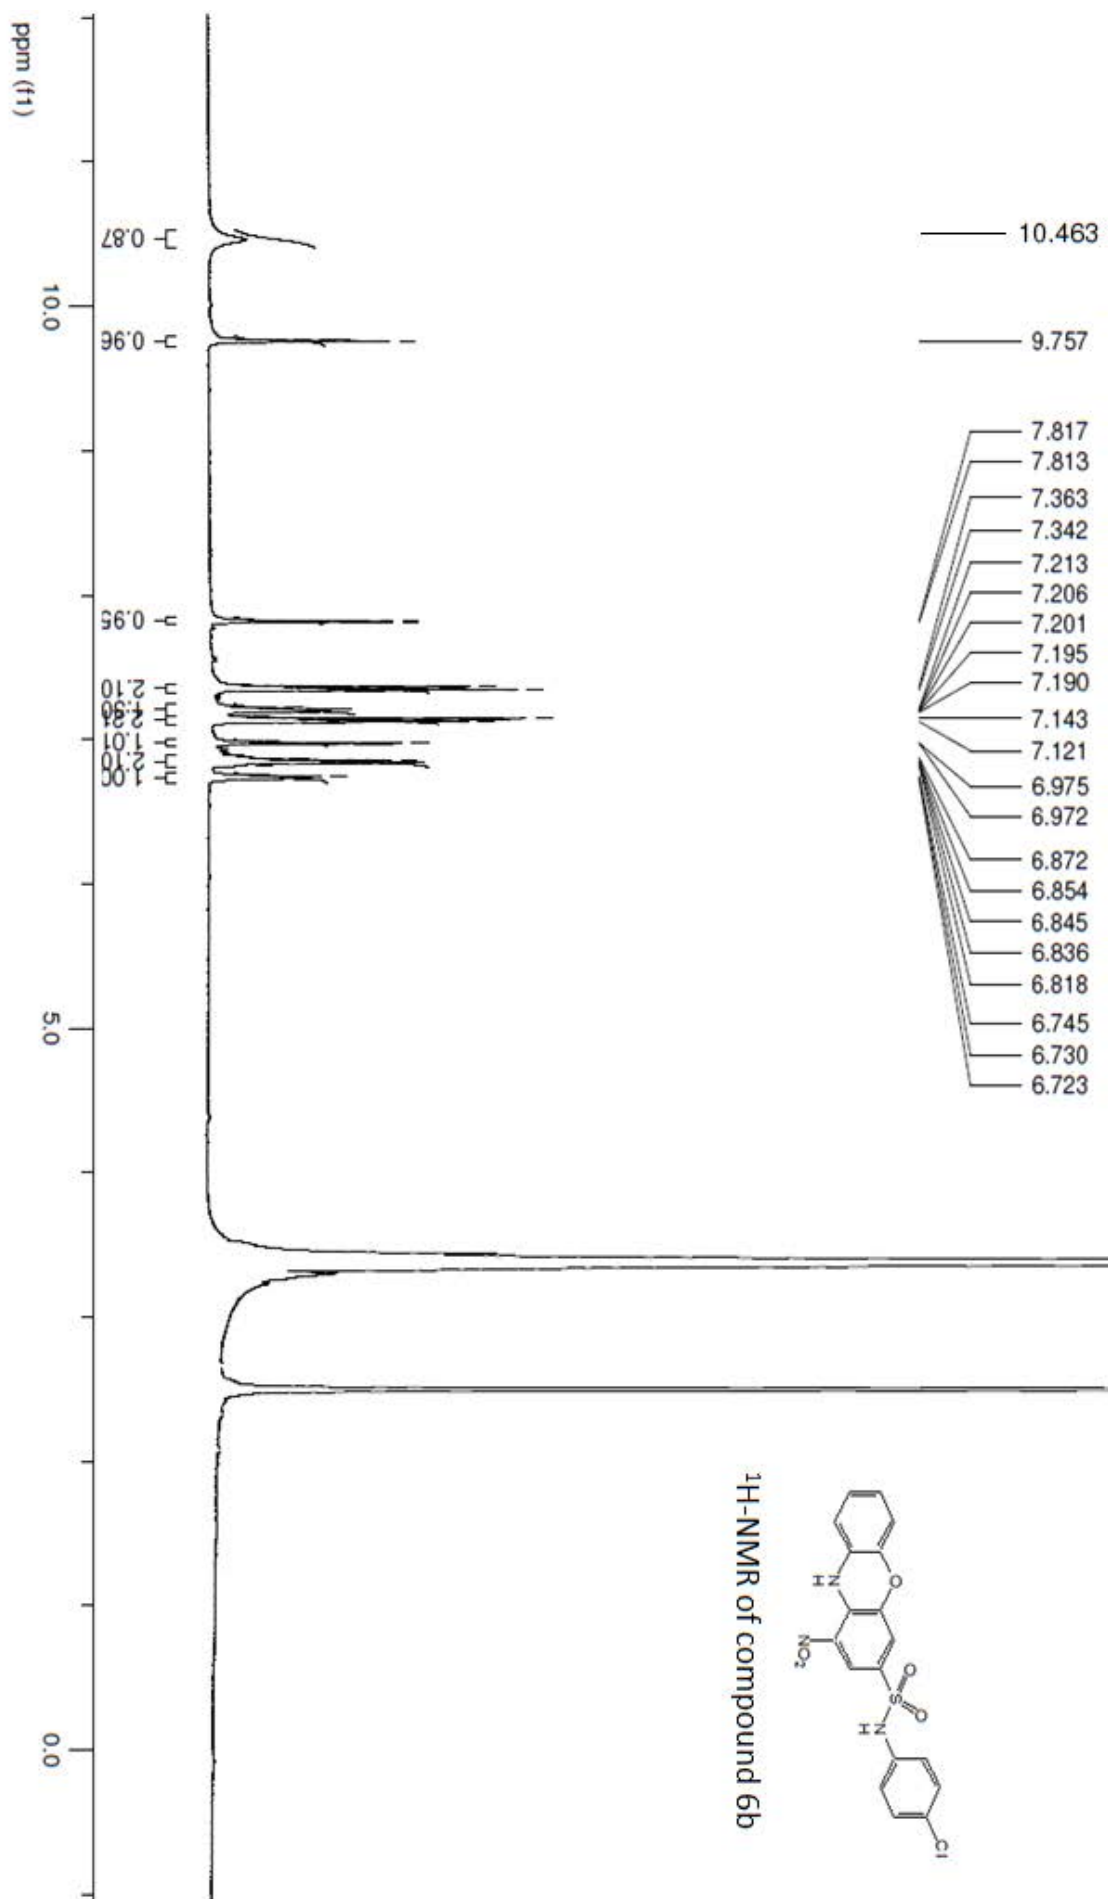

ILS-PVB-MP-6b in DMSO-d6  
13C Expt.  
A.R.No: 20140107\_14

Sample Name:

Data Collected on:  
wormhole-vnmrs400  
Archive directory:

Sample directory:

FidFile: CARBON

Pulse Sequence: CARBON (s2pul)  
Solvent: dms  
Data collected on: Jan 7 2014

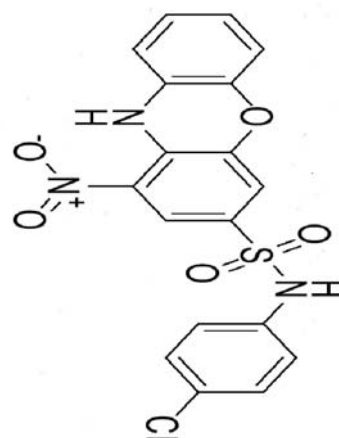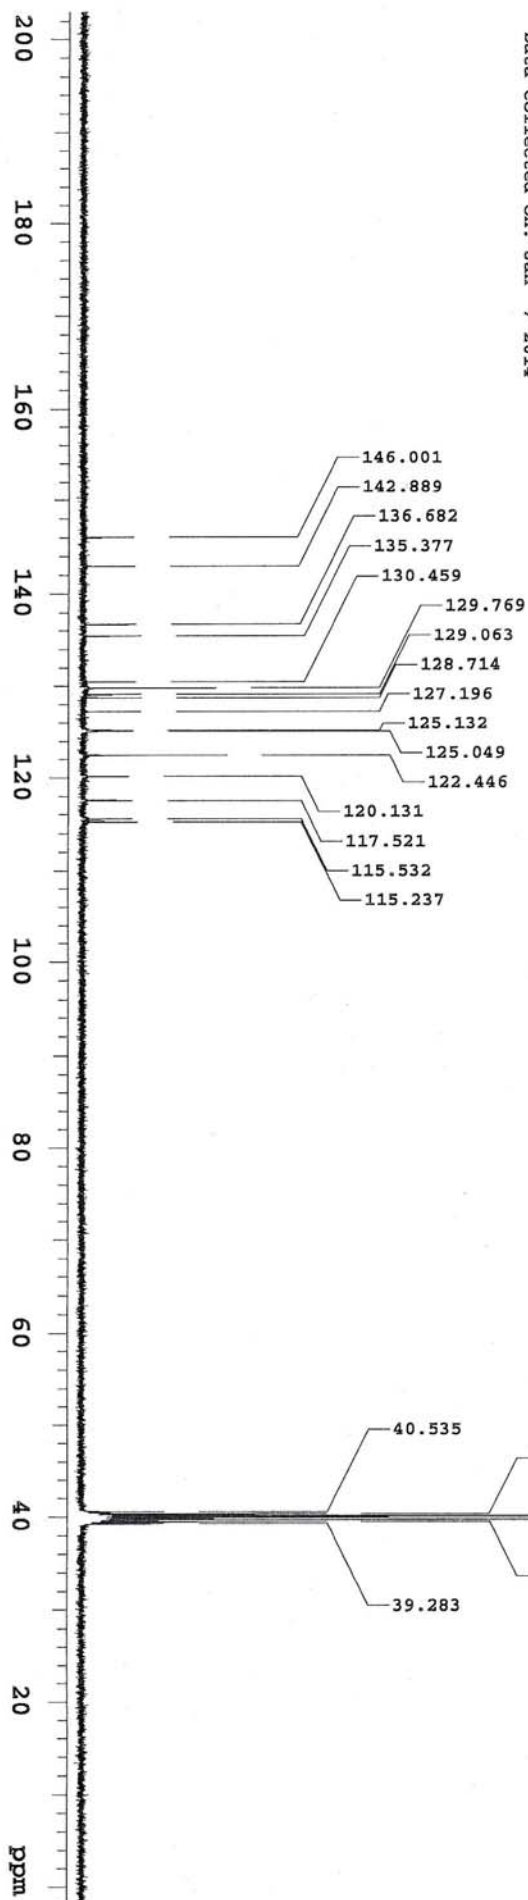



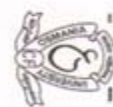

BVK/SVR/1/3

9.740  
8.330  
8.319  
8.302  
7.820  
7.815  
7.412  
7.409  
7.399  
7.396  
7.243  
7.236  
7.224  
7.219  
7.040  
7.034  
6.943  
6.937  
6.915  
6.906  
6.903  
6.894  
6.888  
6.883  
6.872  
6.865  
6.862  
6.857  
6.777  
6.773  
6.759  
6.753  
4.239  
4.229

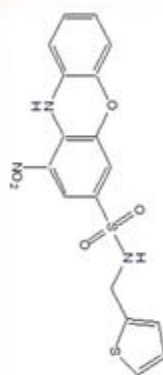

<sup>1</sup>H-NMR of compound 6c

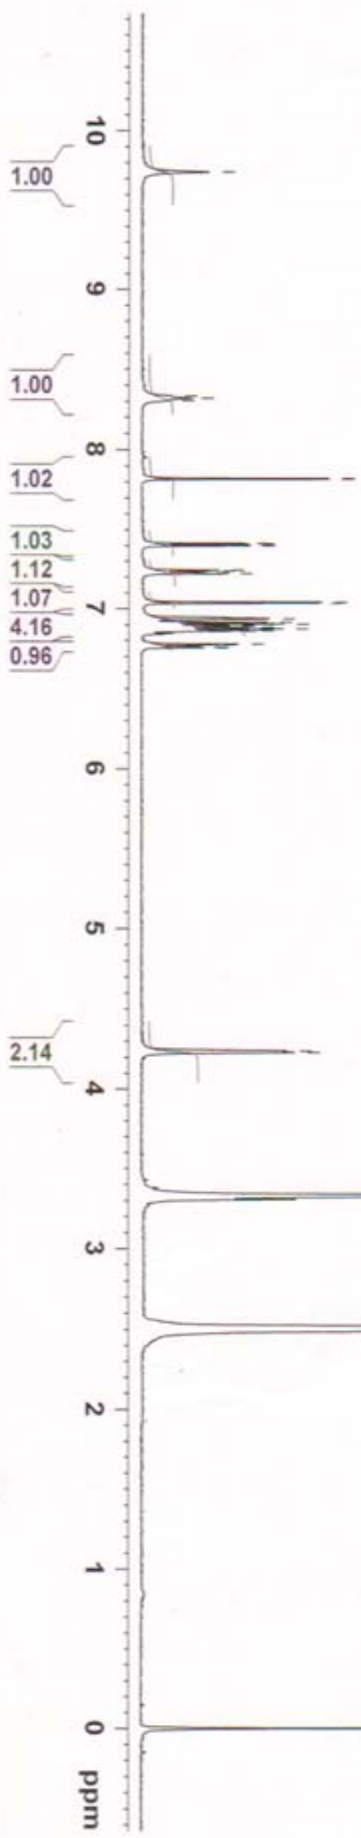

C1204-1037 BVK\SVR\1\3

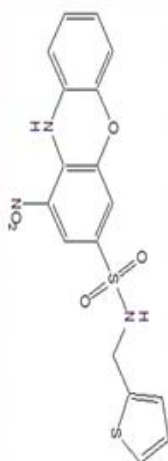

$^{13}\text{C}$ -NMR of compound 6c

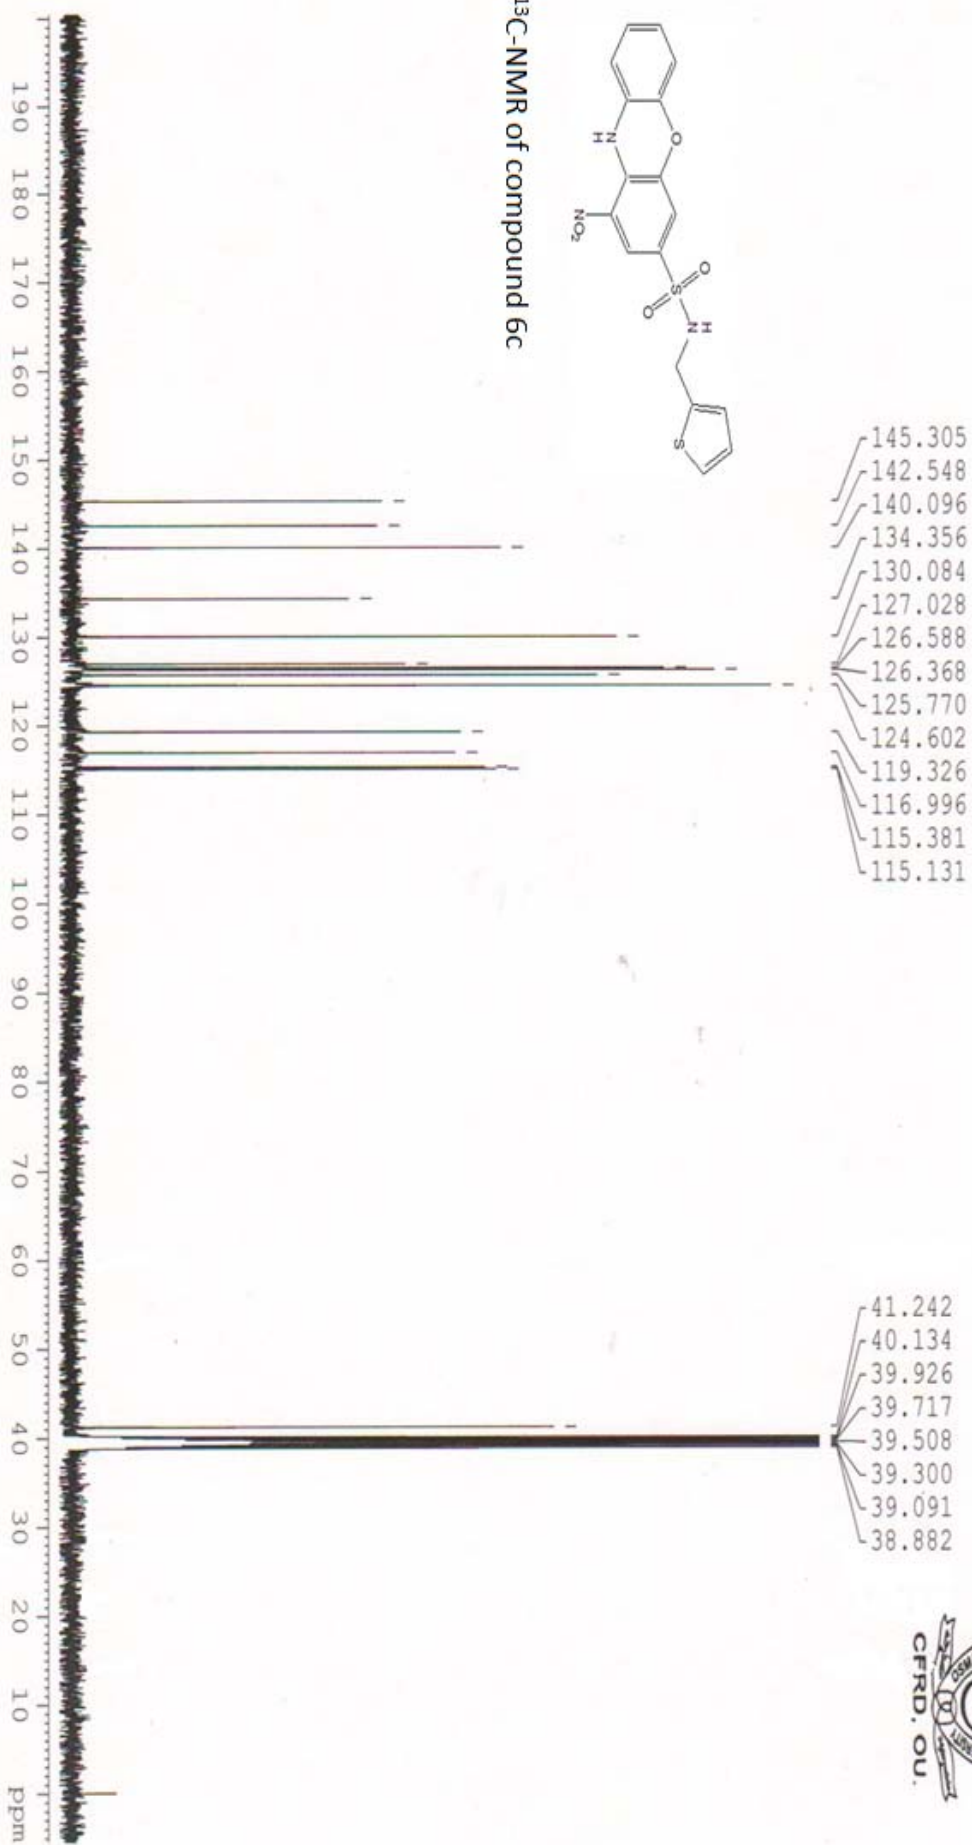

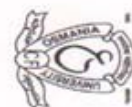

Bvk/SvR/1/4

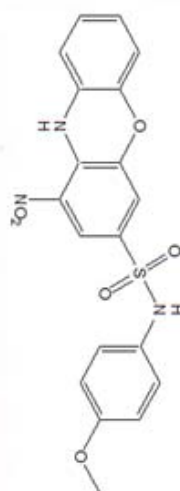

<sup>1</sup>H-NMR of compound 6d

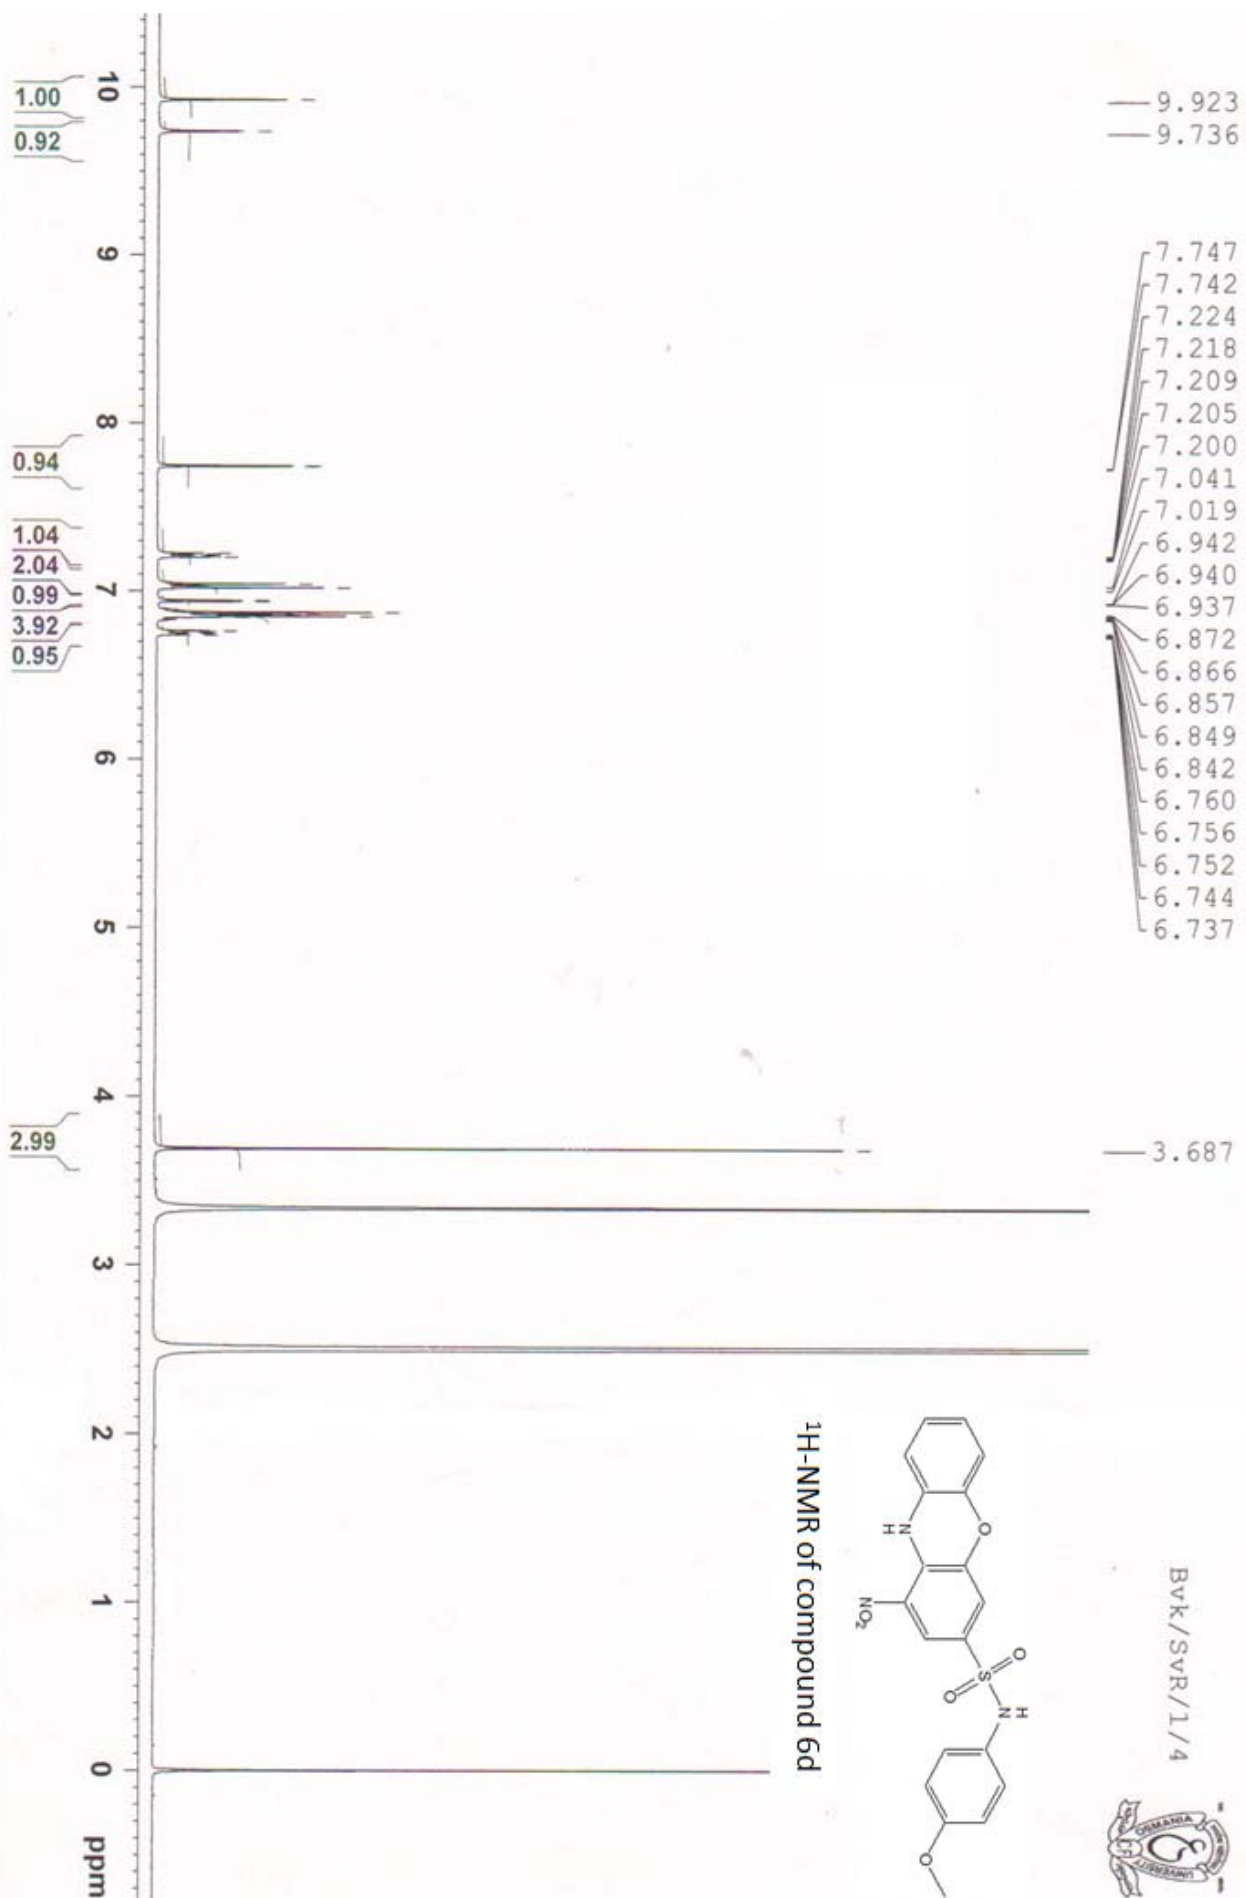

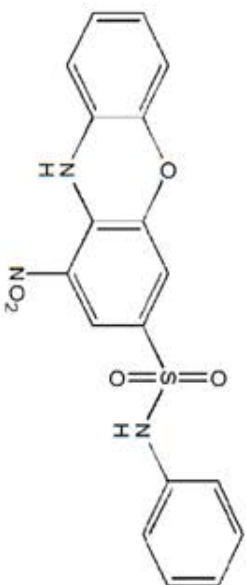

<sup>1</sup>H-NMR of compound 6e

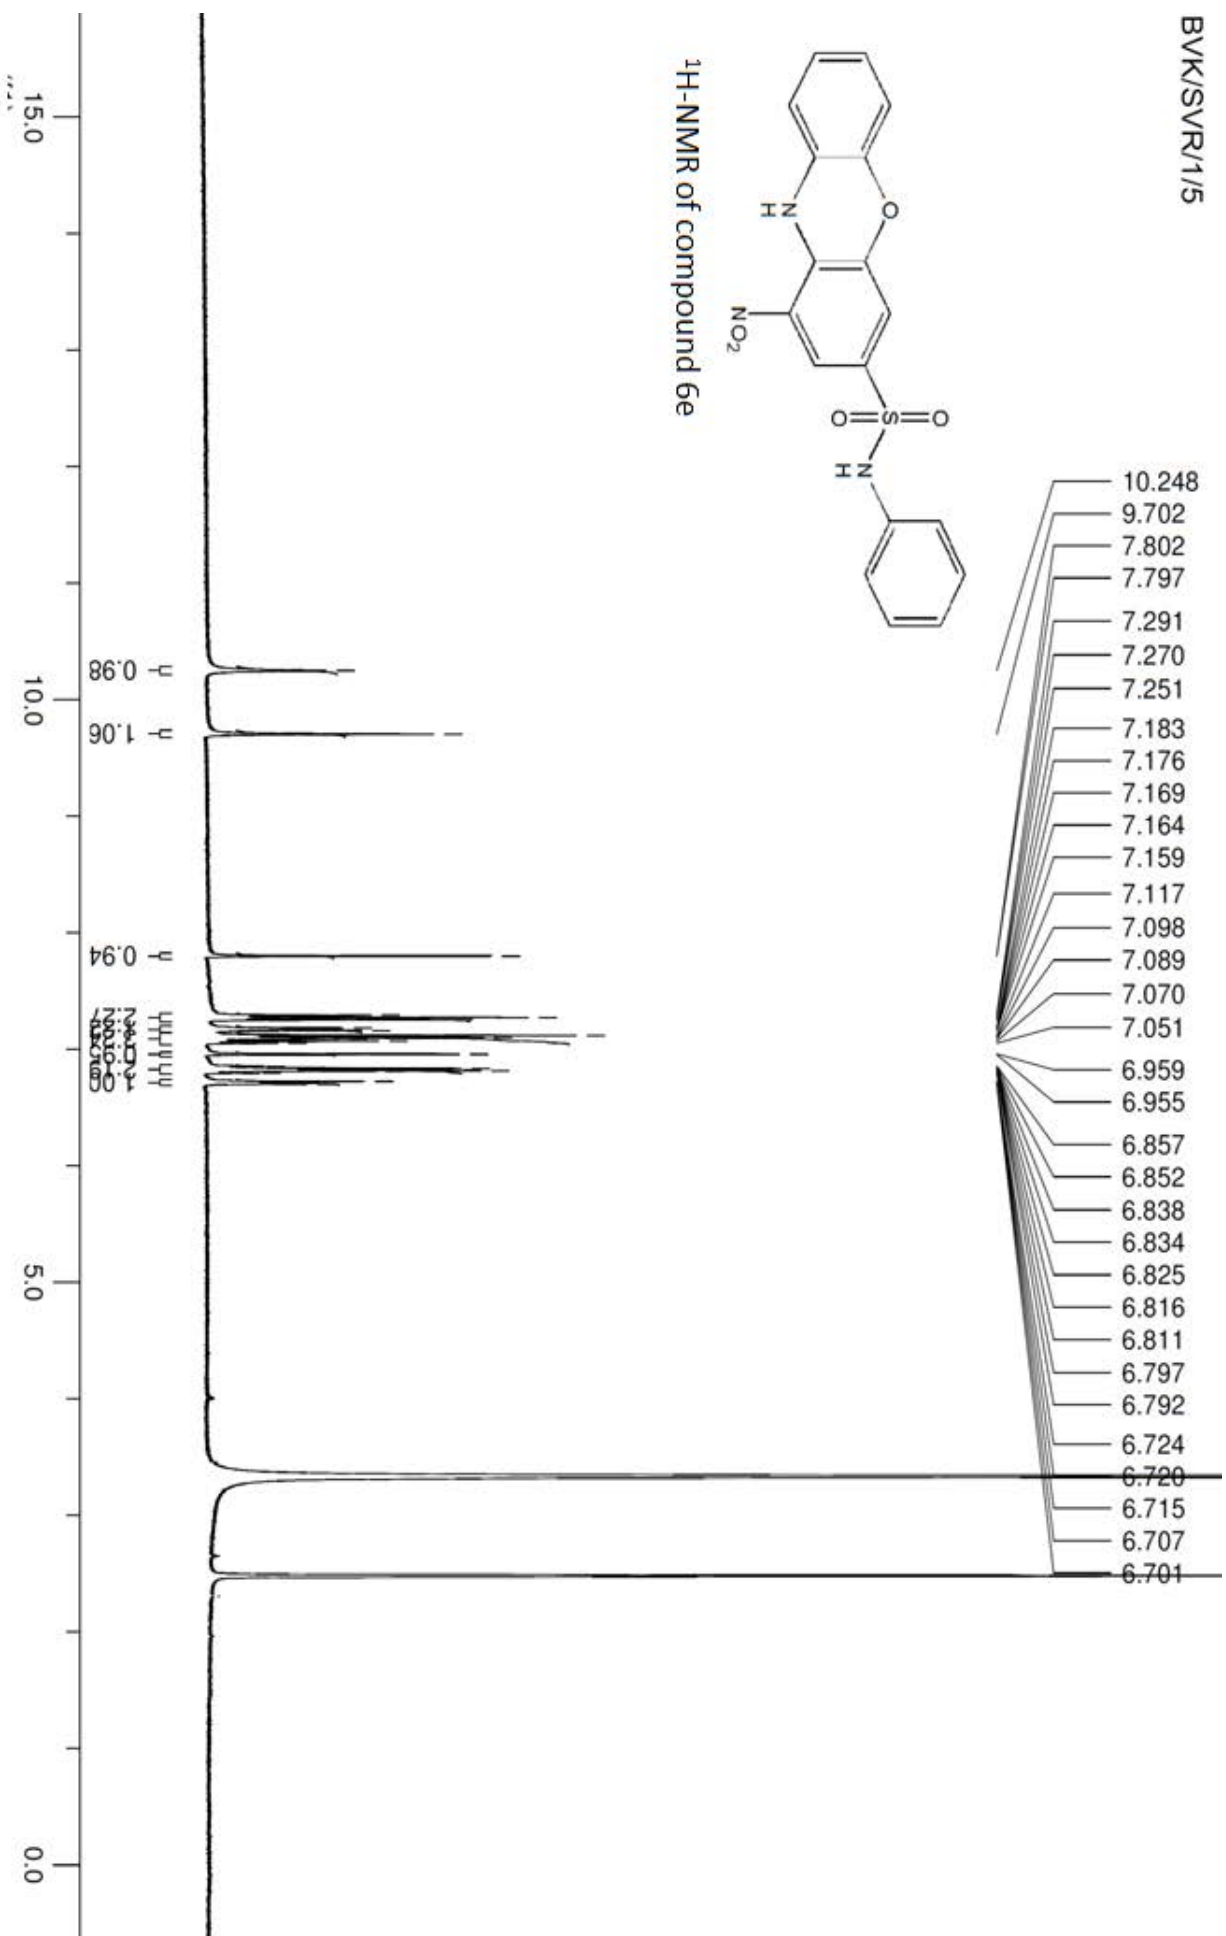

ILS-PVB-MP-66 in DMSO-d6  
13C Expt.  
A.R.No: 20140107\_15

Sample Name:

Data Collected on:  
wormhole-vnmrs400  
Archive directory:

Sample directory:

Fidfile: CARBON

Pulse Sequence: CARBON (s2pul)  
Solvent: dmsc  
Data collected on: Jan 7 2014

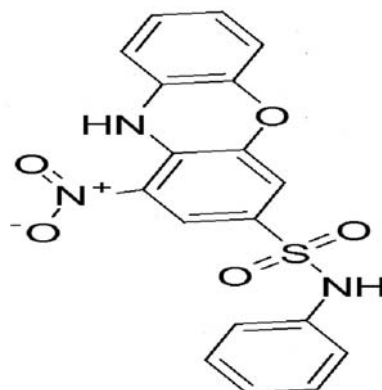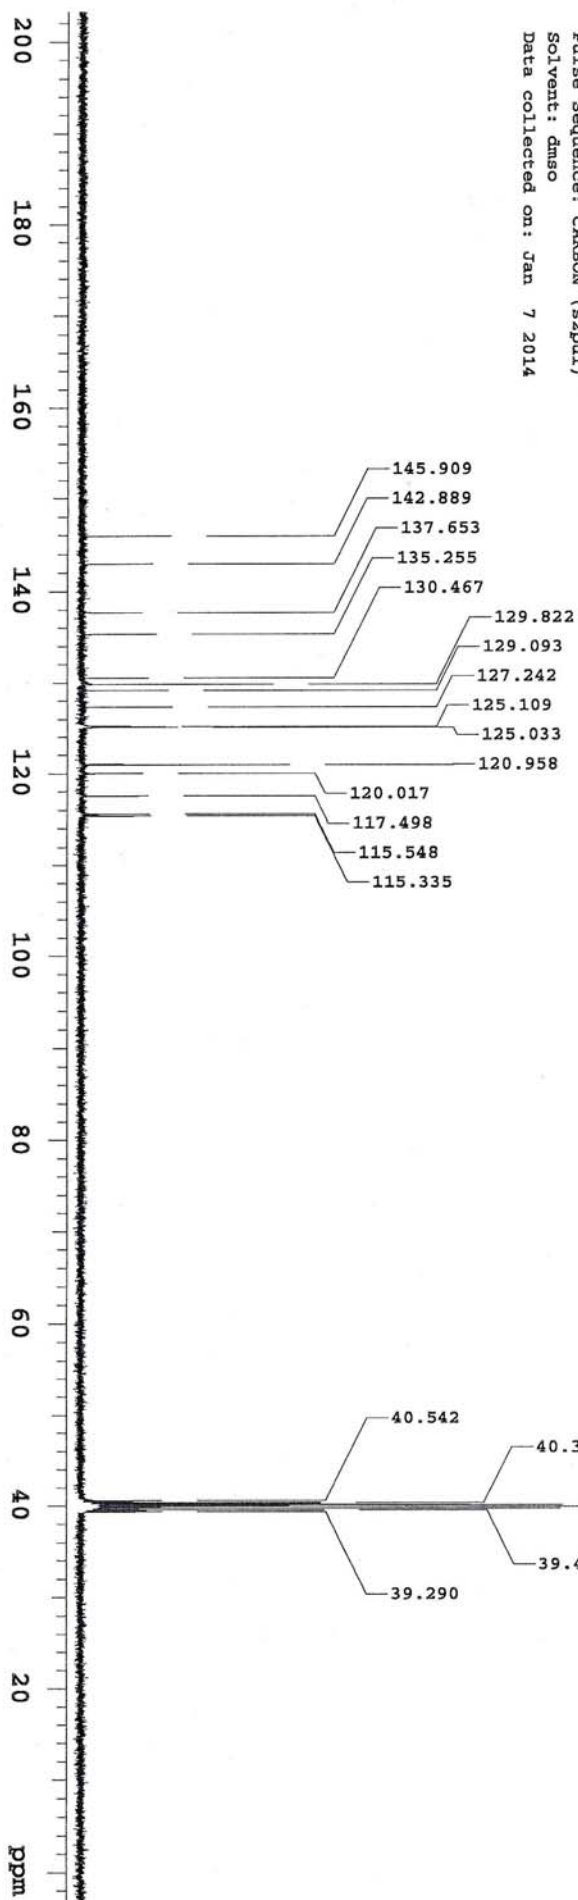

9.709  
8.153  
8.137  
8.121  
7.721  
7.716  
7.243  
7.237  
7.228  
7.224  
7.220  
7.131  
7.109  
6.914  
6.910  
6.885  
6.880  
6.870  
6.861  
6.855  
6.811  
6.789  
6.768  
6.751  
6.745

3.981  
3.965  
3.638

BVK/SVR/1/6

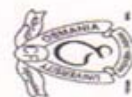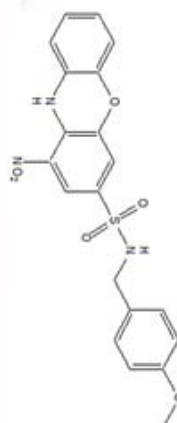

<sup>1</sup>H-NMR of compound 6f

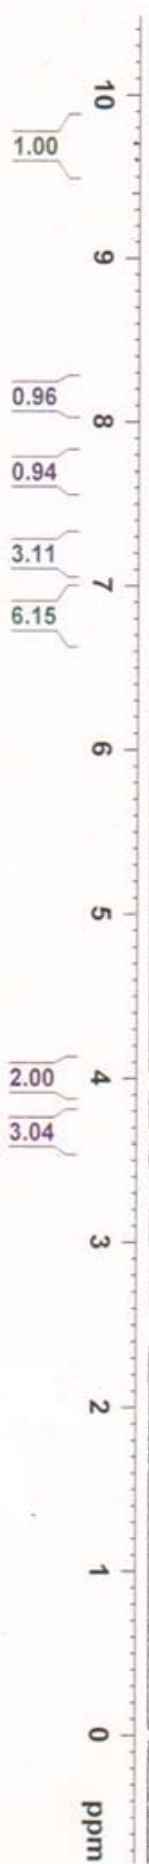

BVK/SVR/1/7

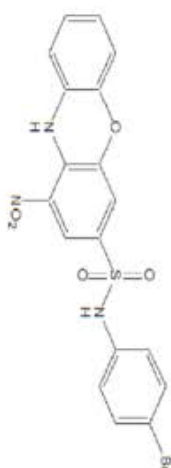

<sup>1</sup>H-NMR of compound 6g

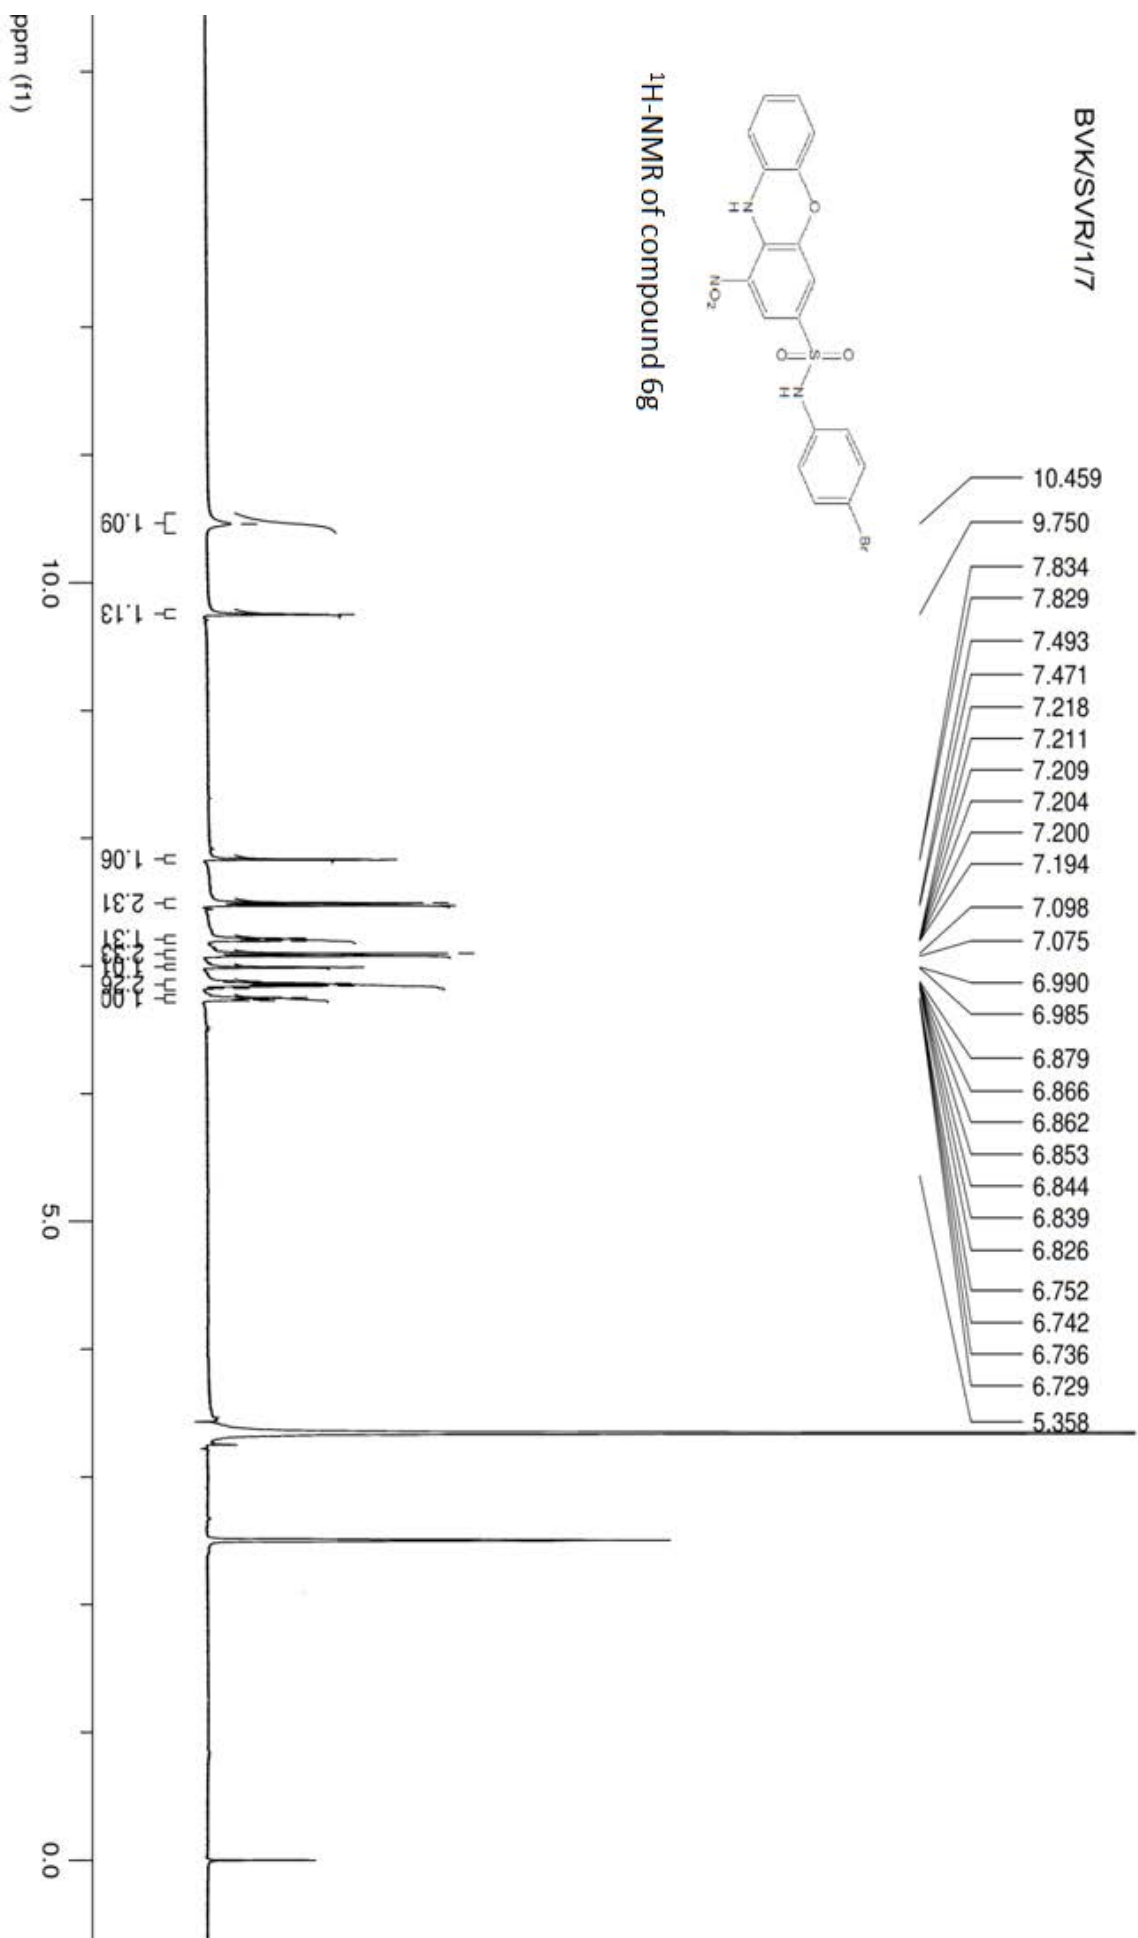



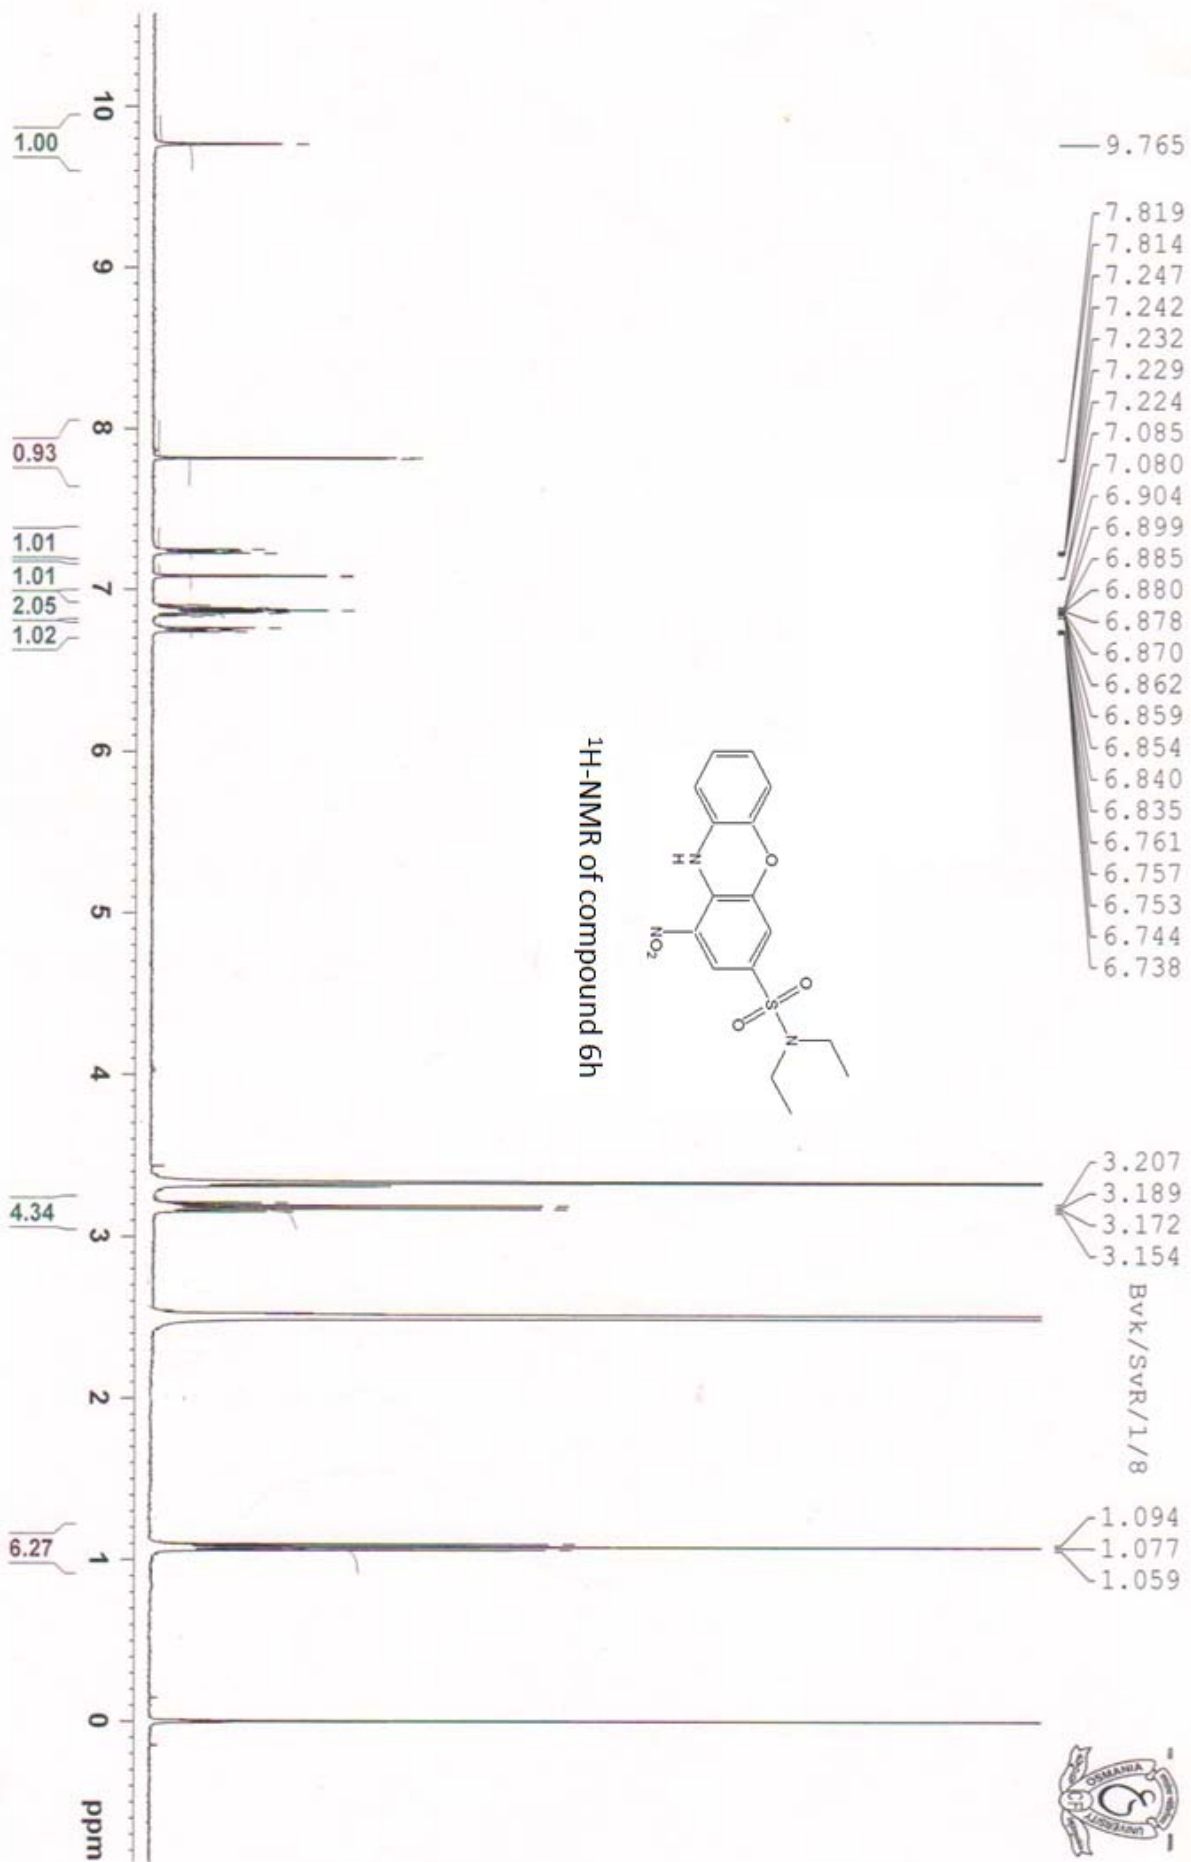



- 145.689
- 142.545
- 134.570
- 130.299
- 129.139
- 127.001
- 124.624
- 119.347
- 117.019
- 115.237
- 115.095

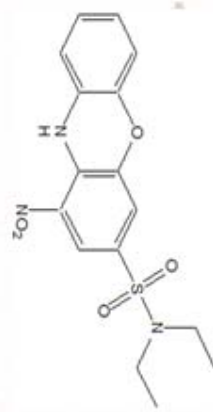

<sup>13</sup>C-NMR of compound 6h

- 41.934
- 40.138
- 39.929
- 39.720
- 39.512
- 39.303
- 39.094
- 38.885

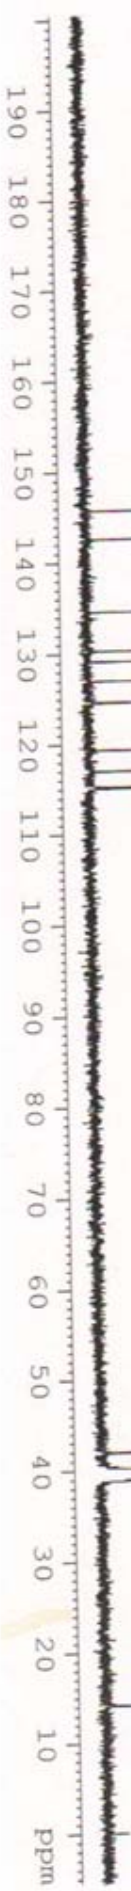

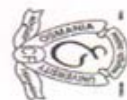

BVK/SVR/1/9

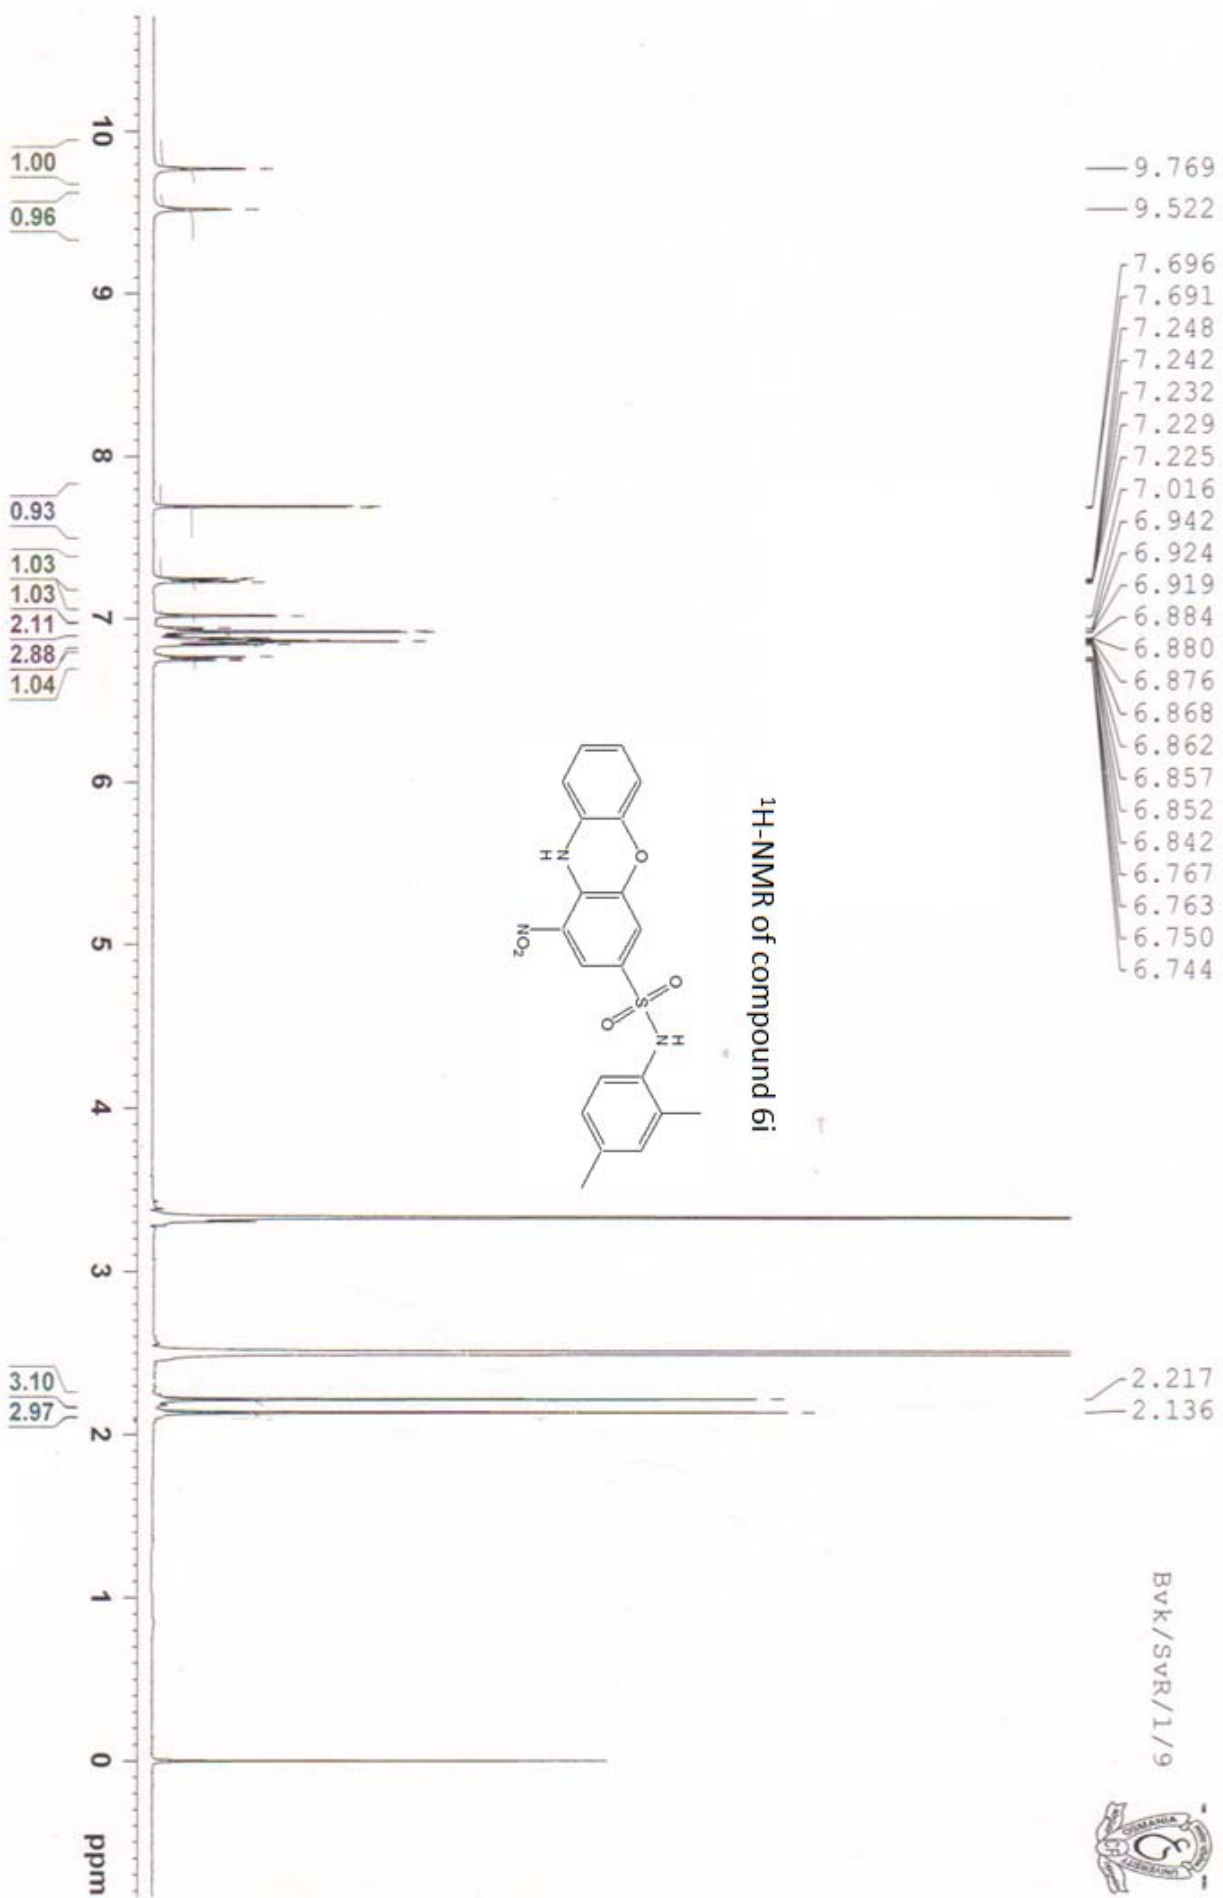

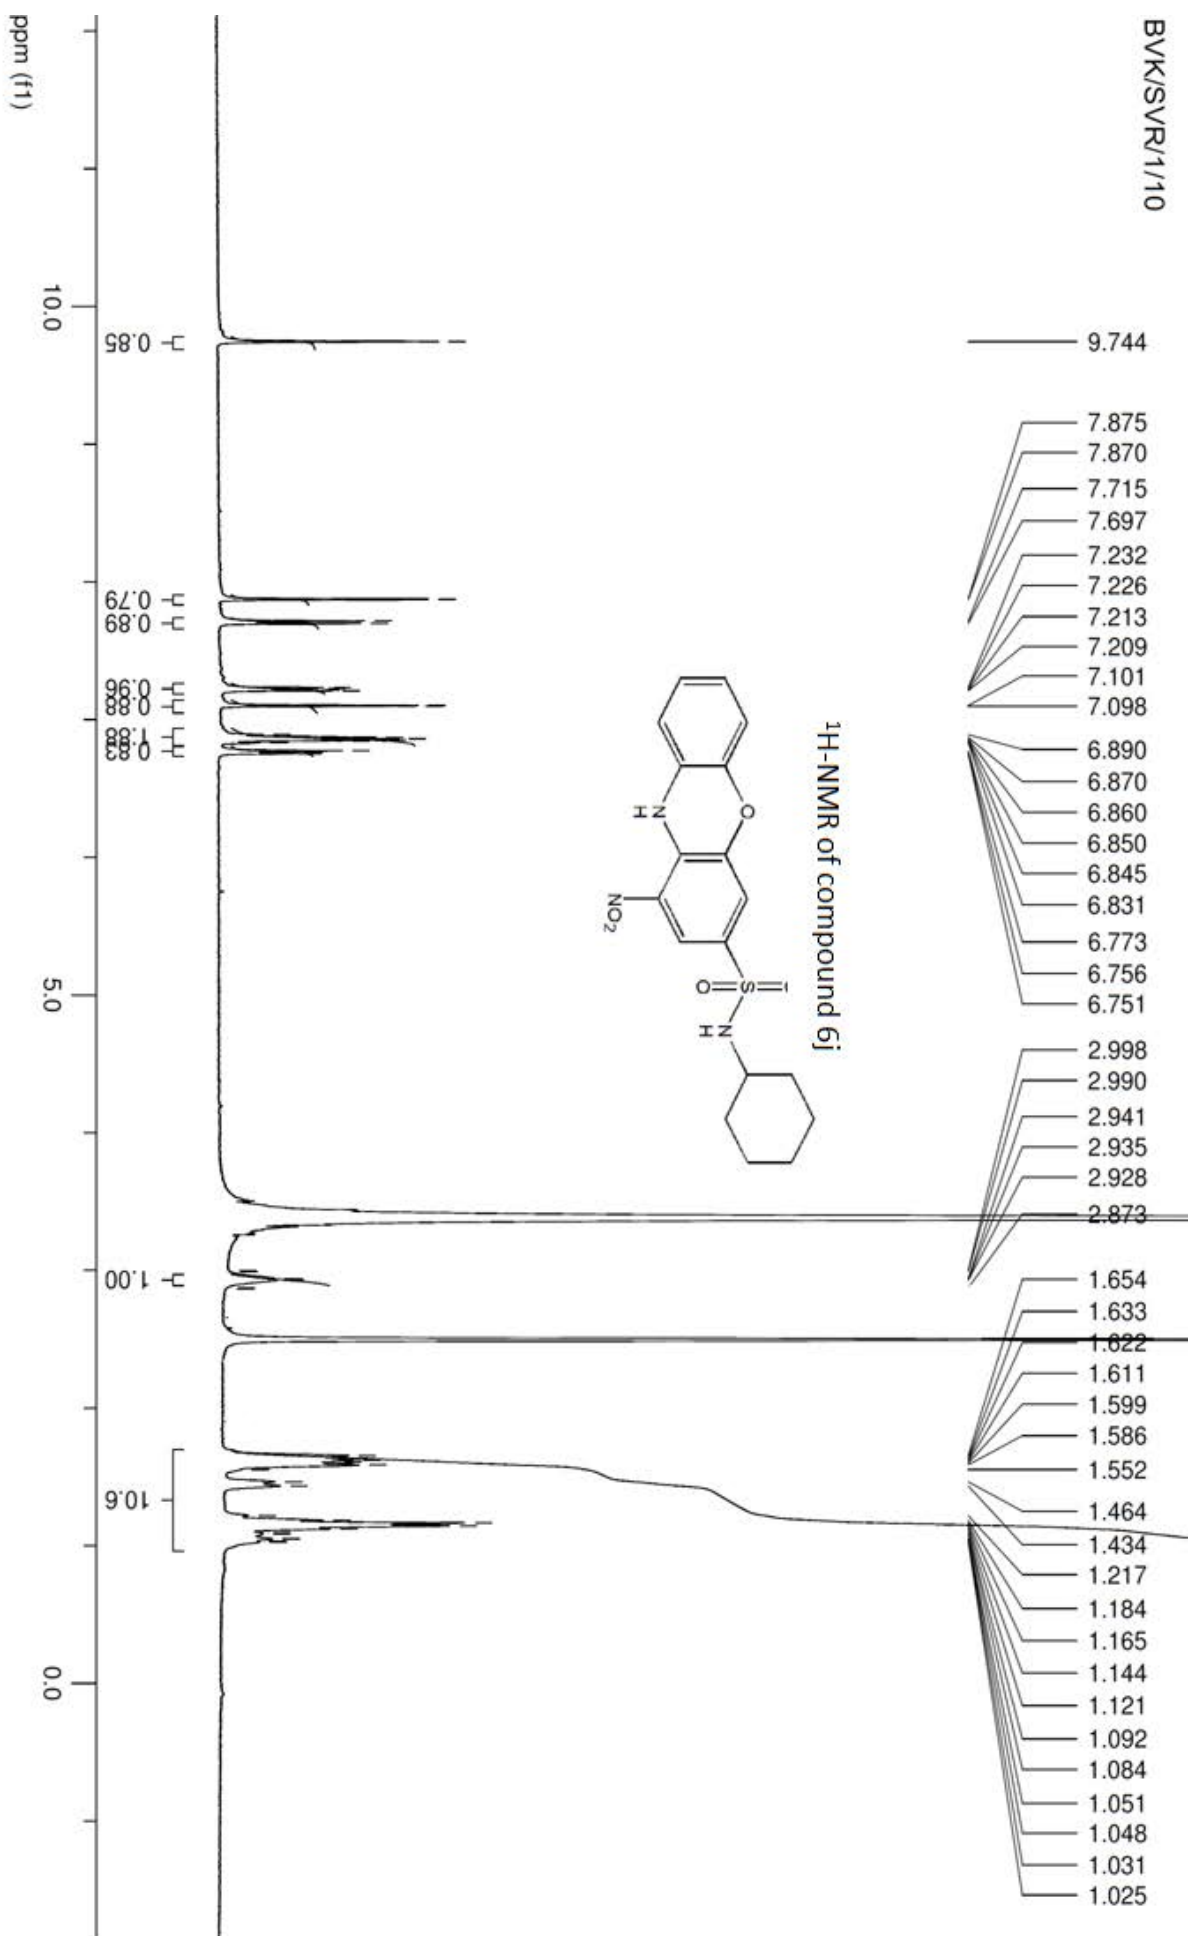

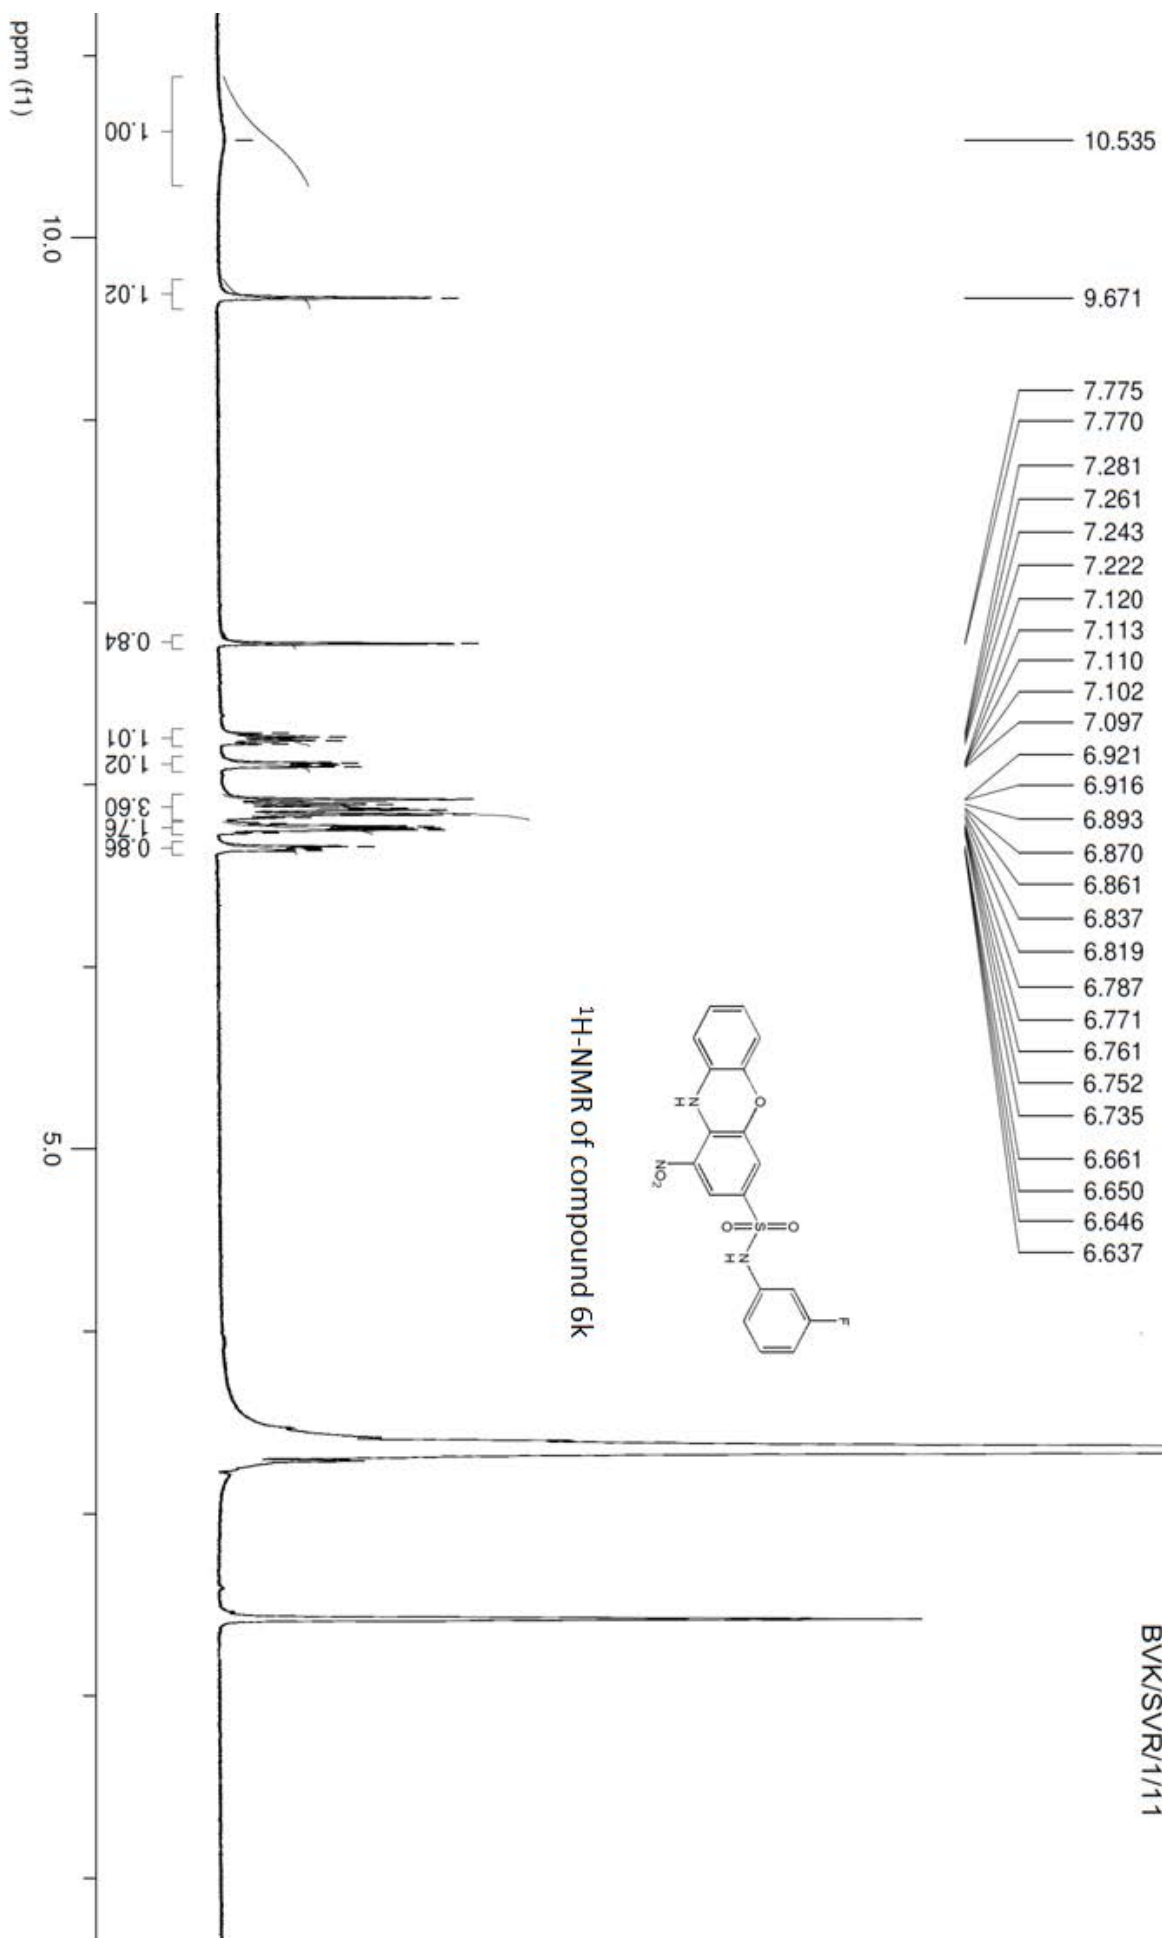

BVK/SVR/1/12

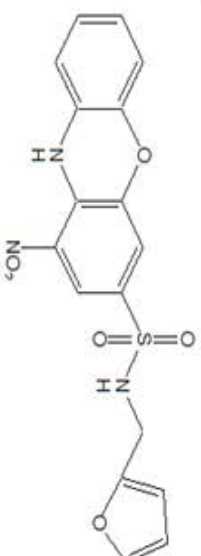

<sup>1</sup>H-NMR of compound 6I

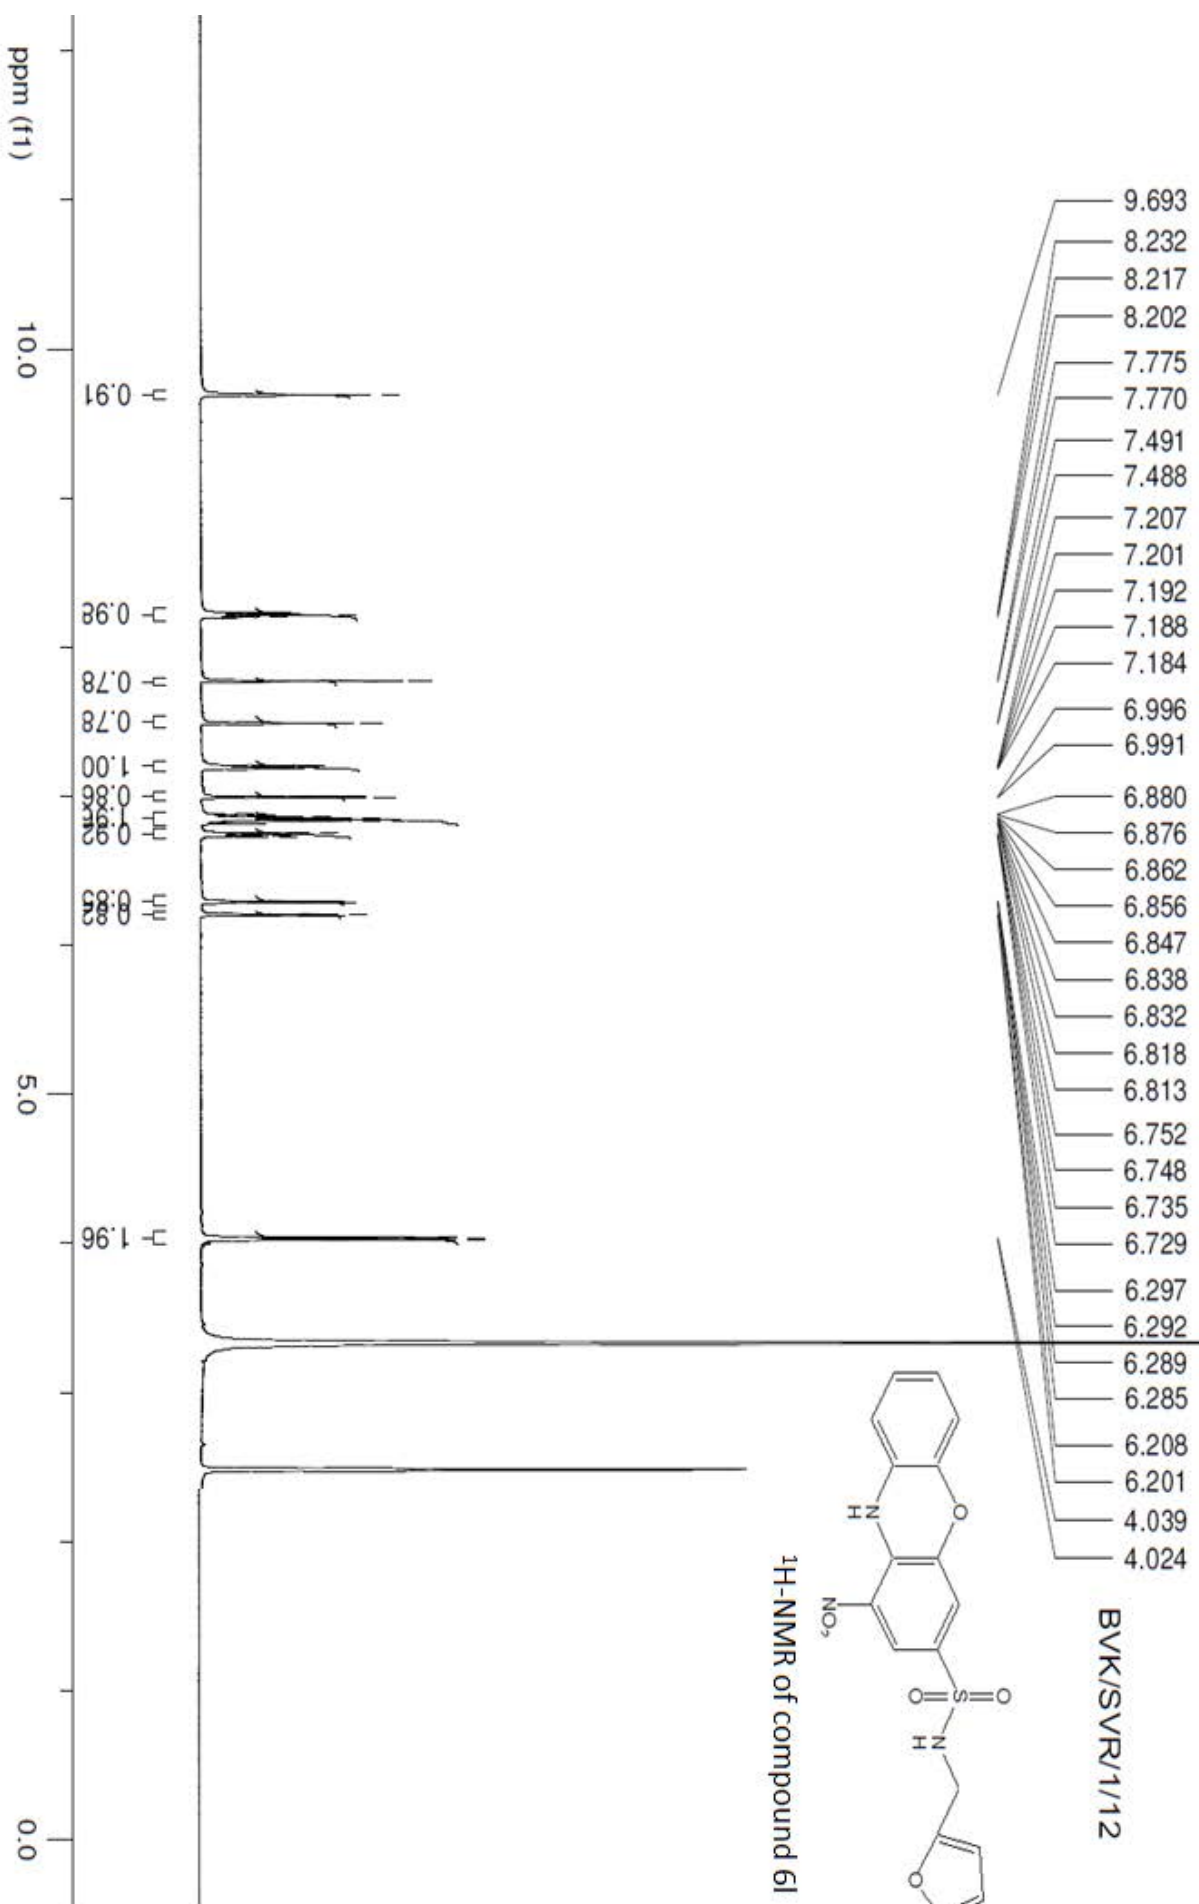

BVK/SVR/1/13

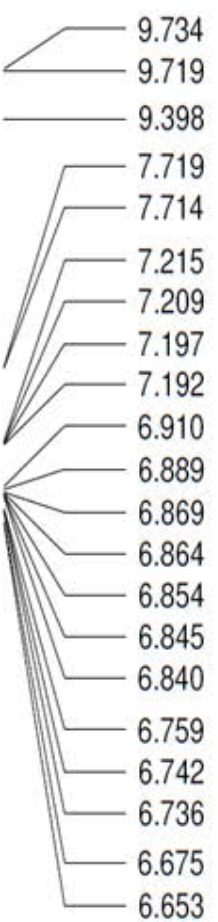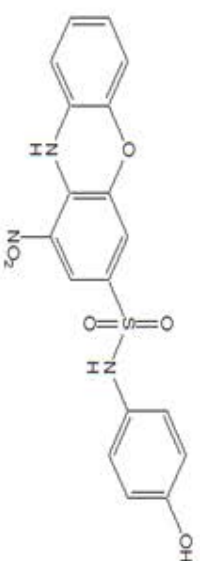

<sup>1</sup>H-NMR of compound 6m

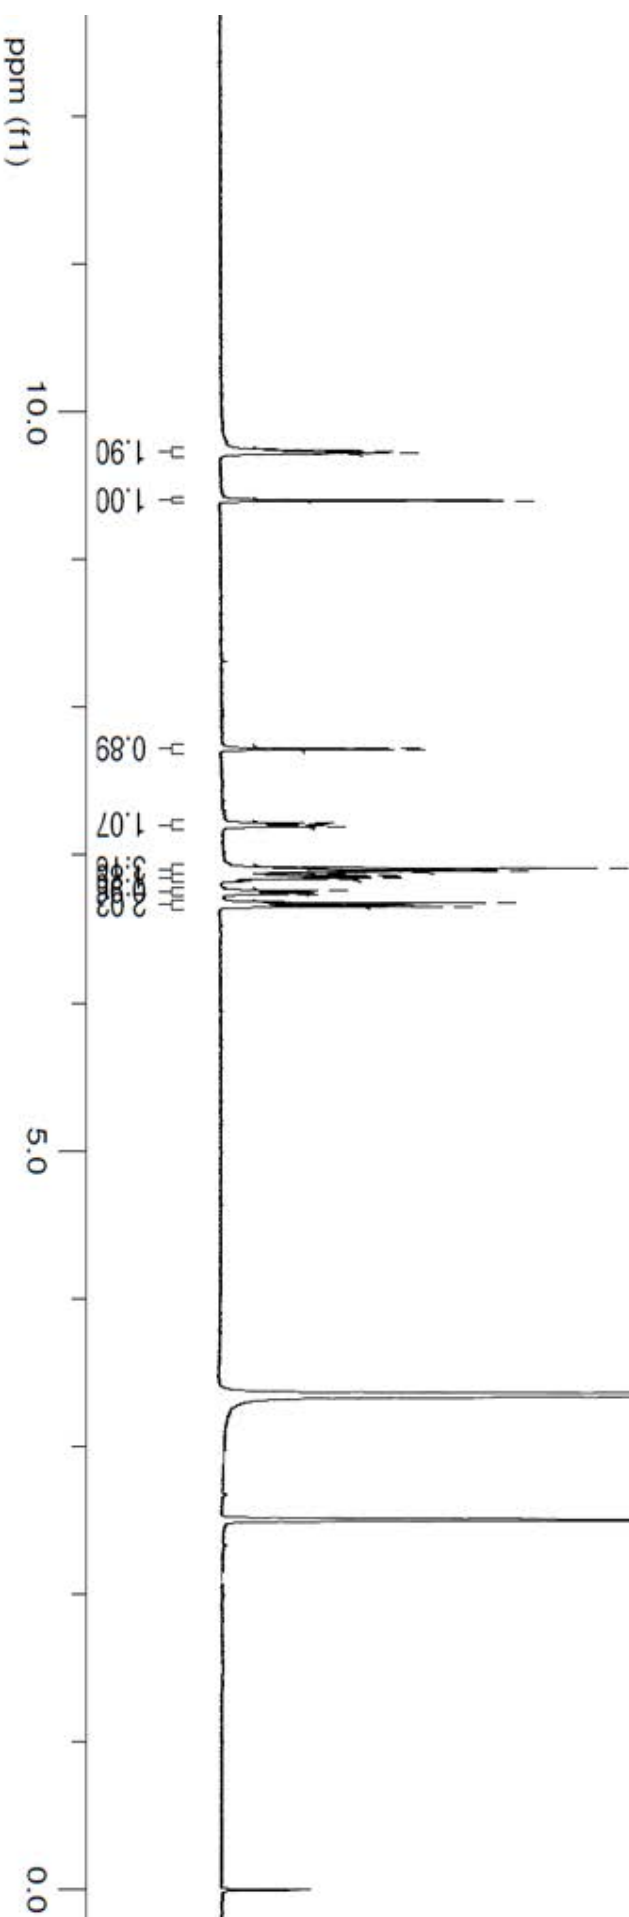

$^{13}\text{C}$  NMR of compound 6m

DMSO-d<sub>6</sub>

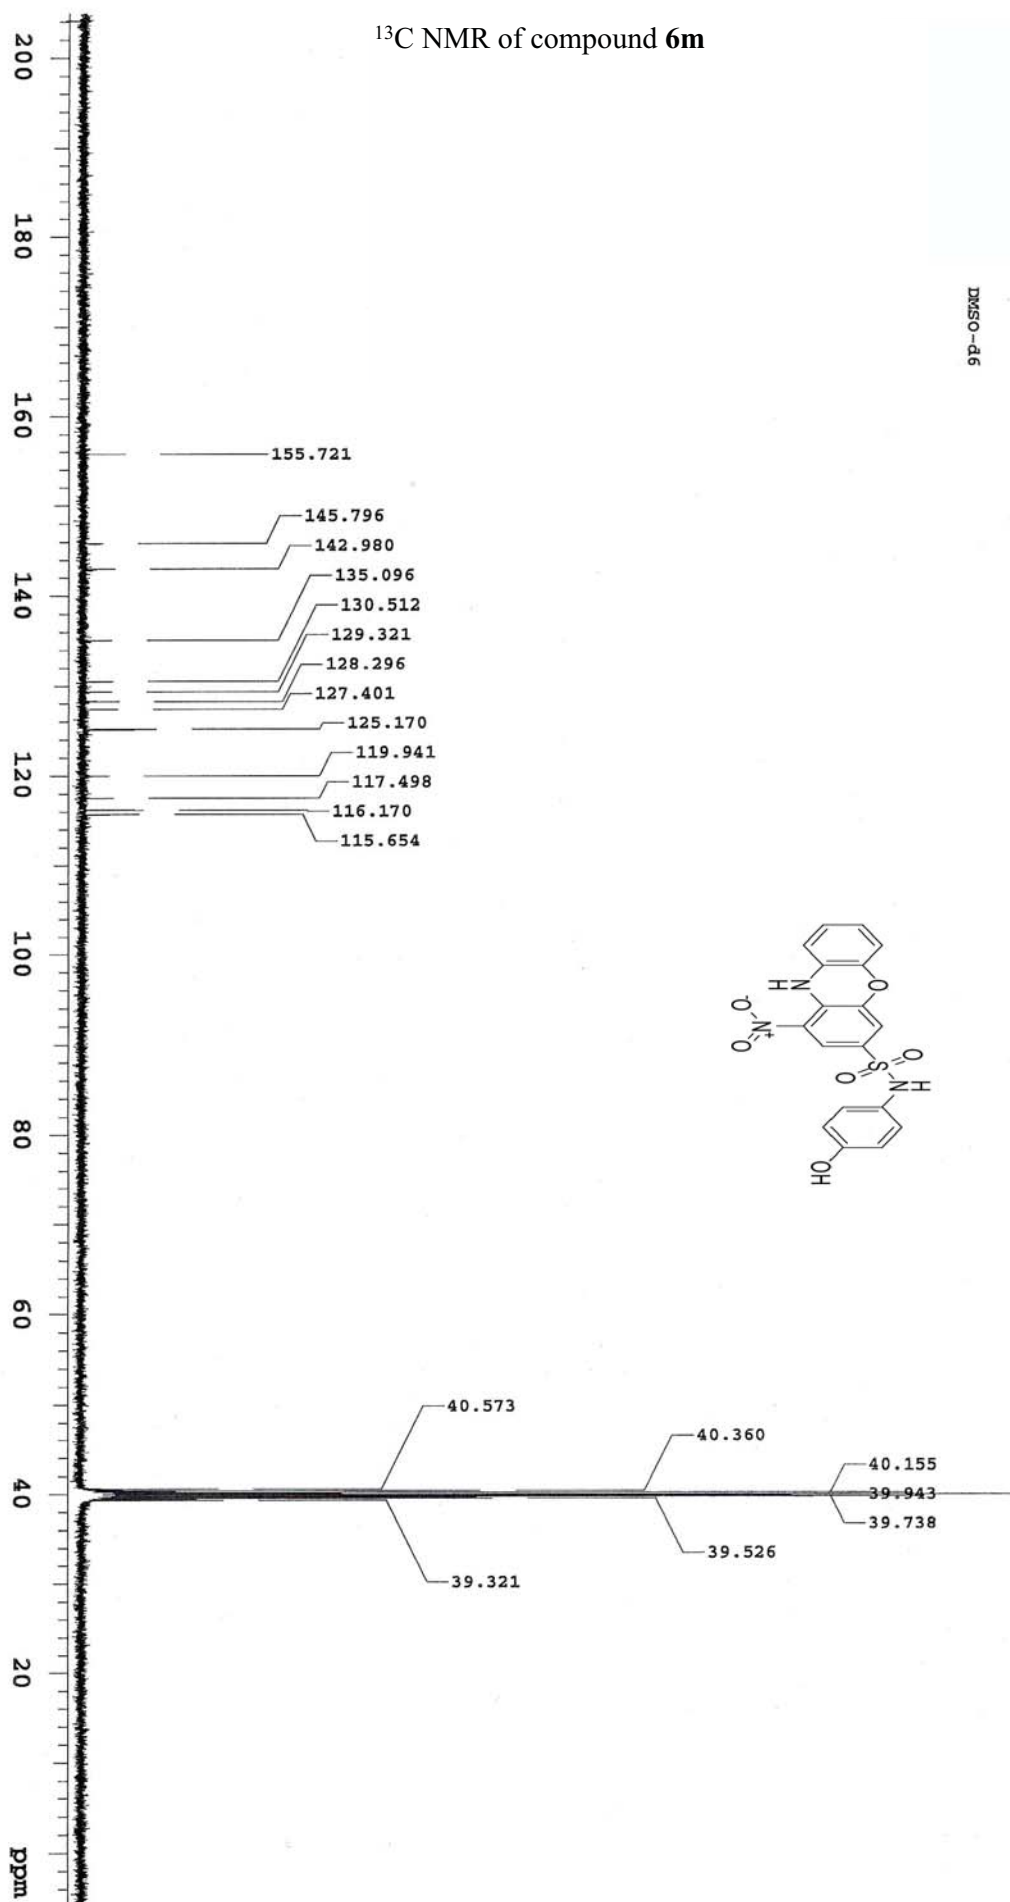

Vijay.



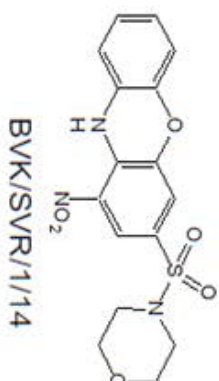

<sup>1</sup>H-NMR of compound 6n

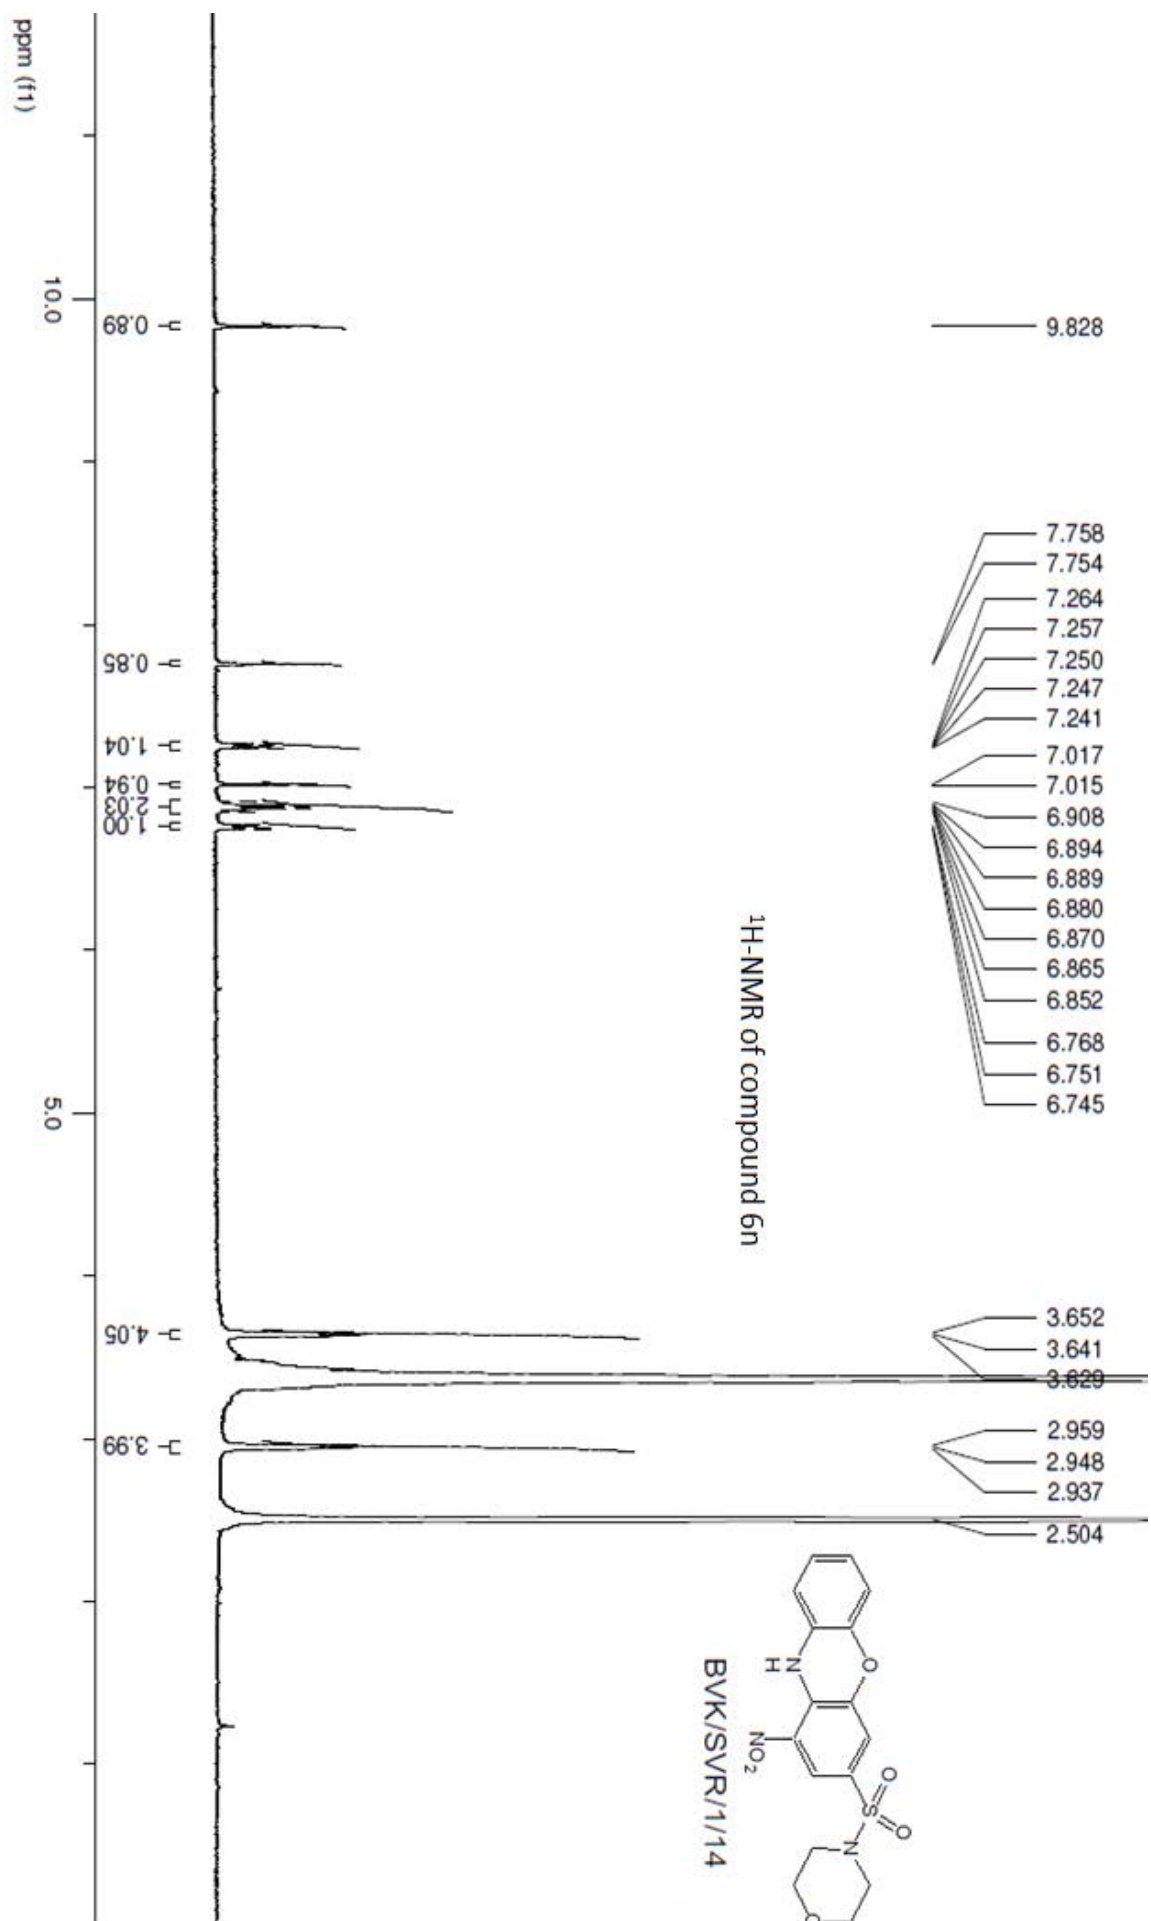



<sup>13</sup>C NMR of compound **6n**

DMSO-d<sub>6</sub>

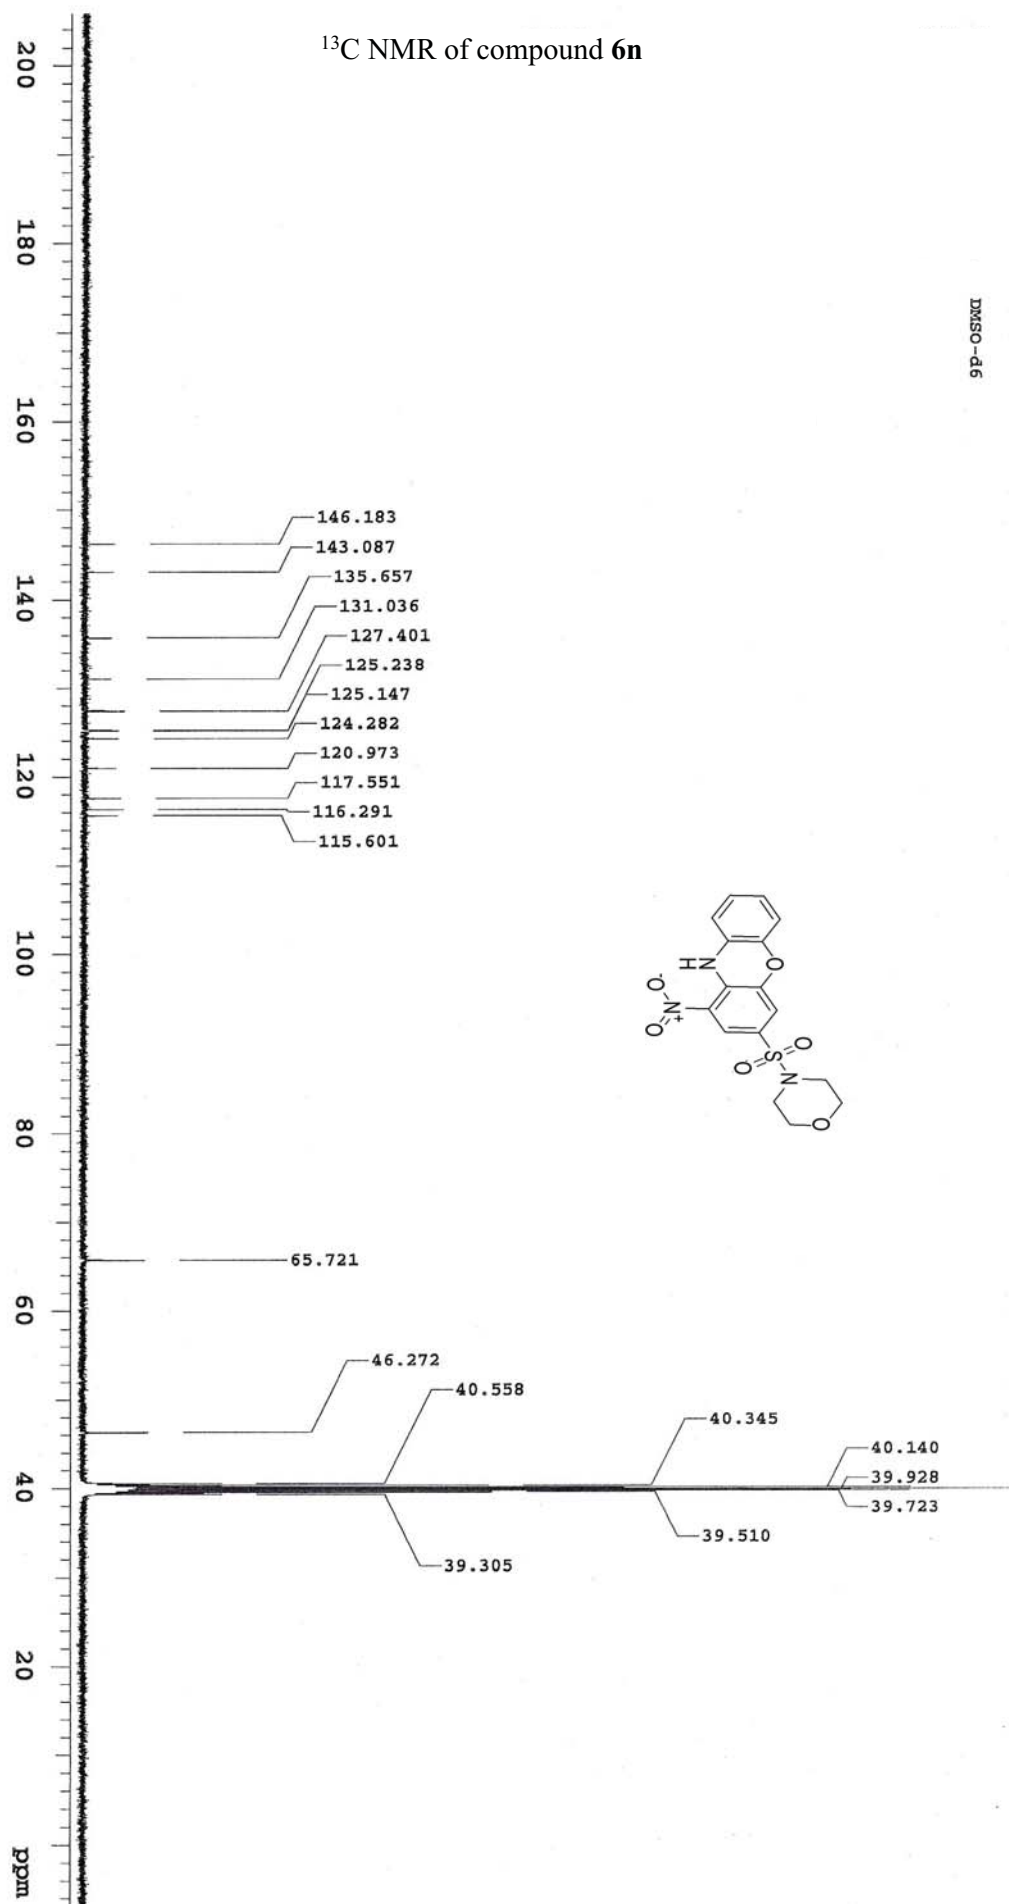

BVK/SVR/1/15

2.175

9.780  
9.651  
7.703  
7.698  
7.245  
7.239  
7.222  
7.213  
7.210  
7.199  
7.150  
7.142  
7.136  
7.127  
7.009  
6.999  
6.995  
6.986  
6.976  
6.922  
6.918  
6.898  
6.894  
6.875  
6.864  
6.856  
6.853  
6.848  
6.834  
6.830  
6.762  
6.744  
6.740

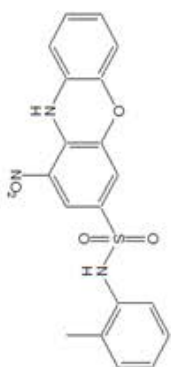

<sup>1</sup>H-NMR of compound 6o

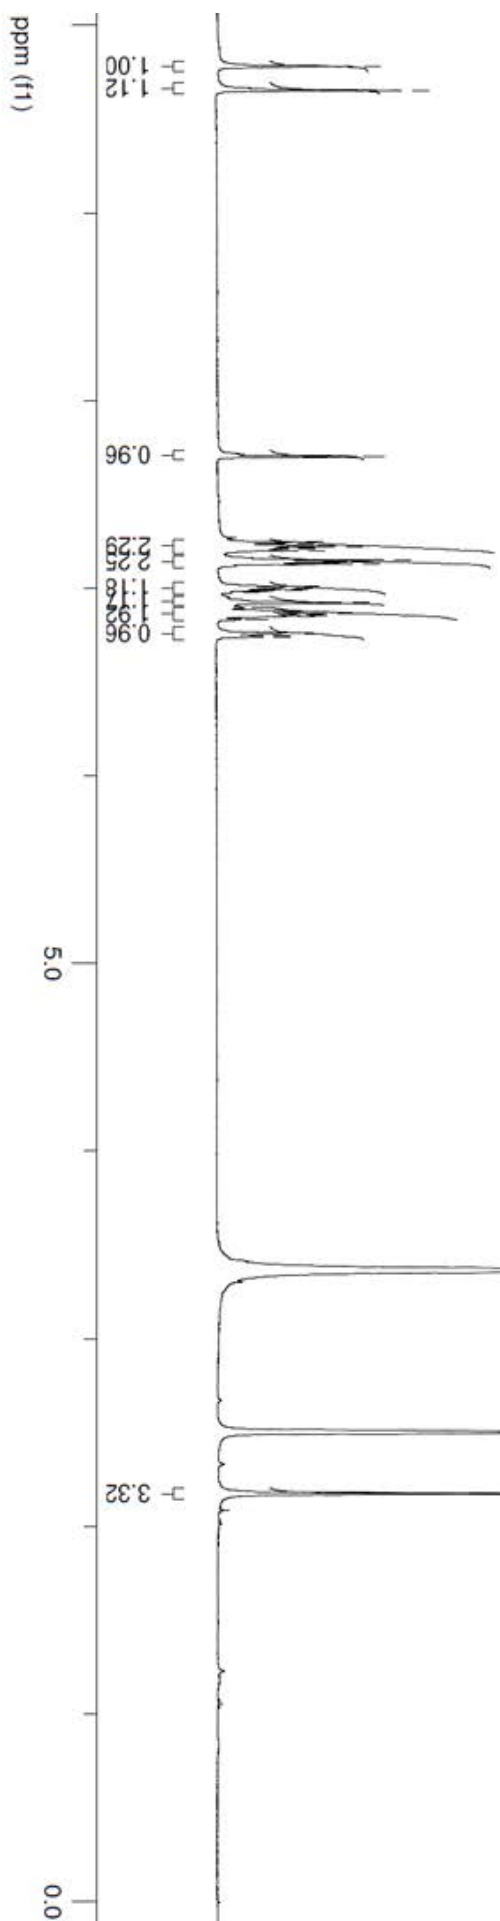

<sup>13</sup>C NMR of compound 60

DMSO-d<sub>6</sub>

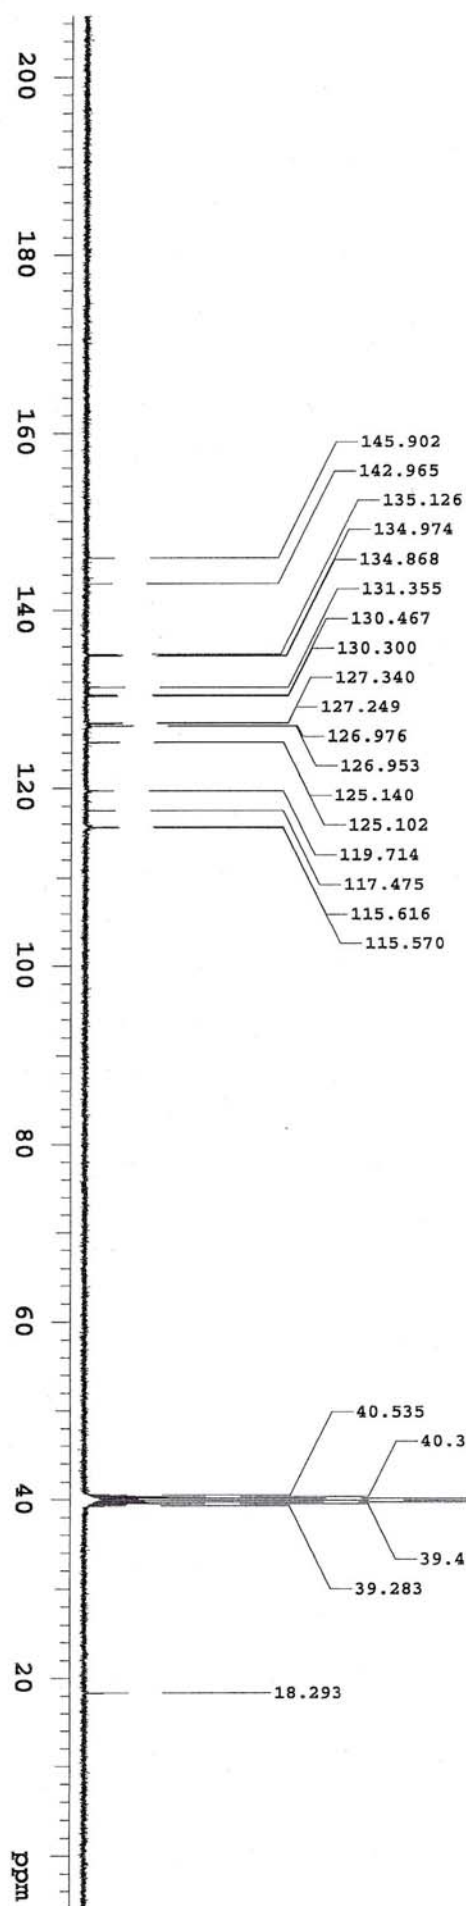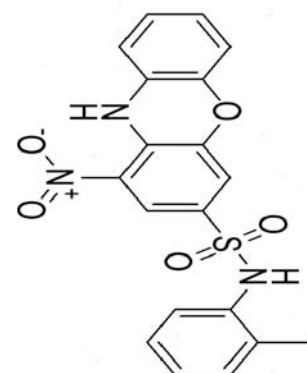

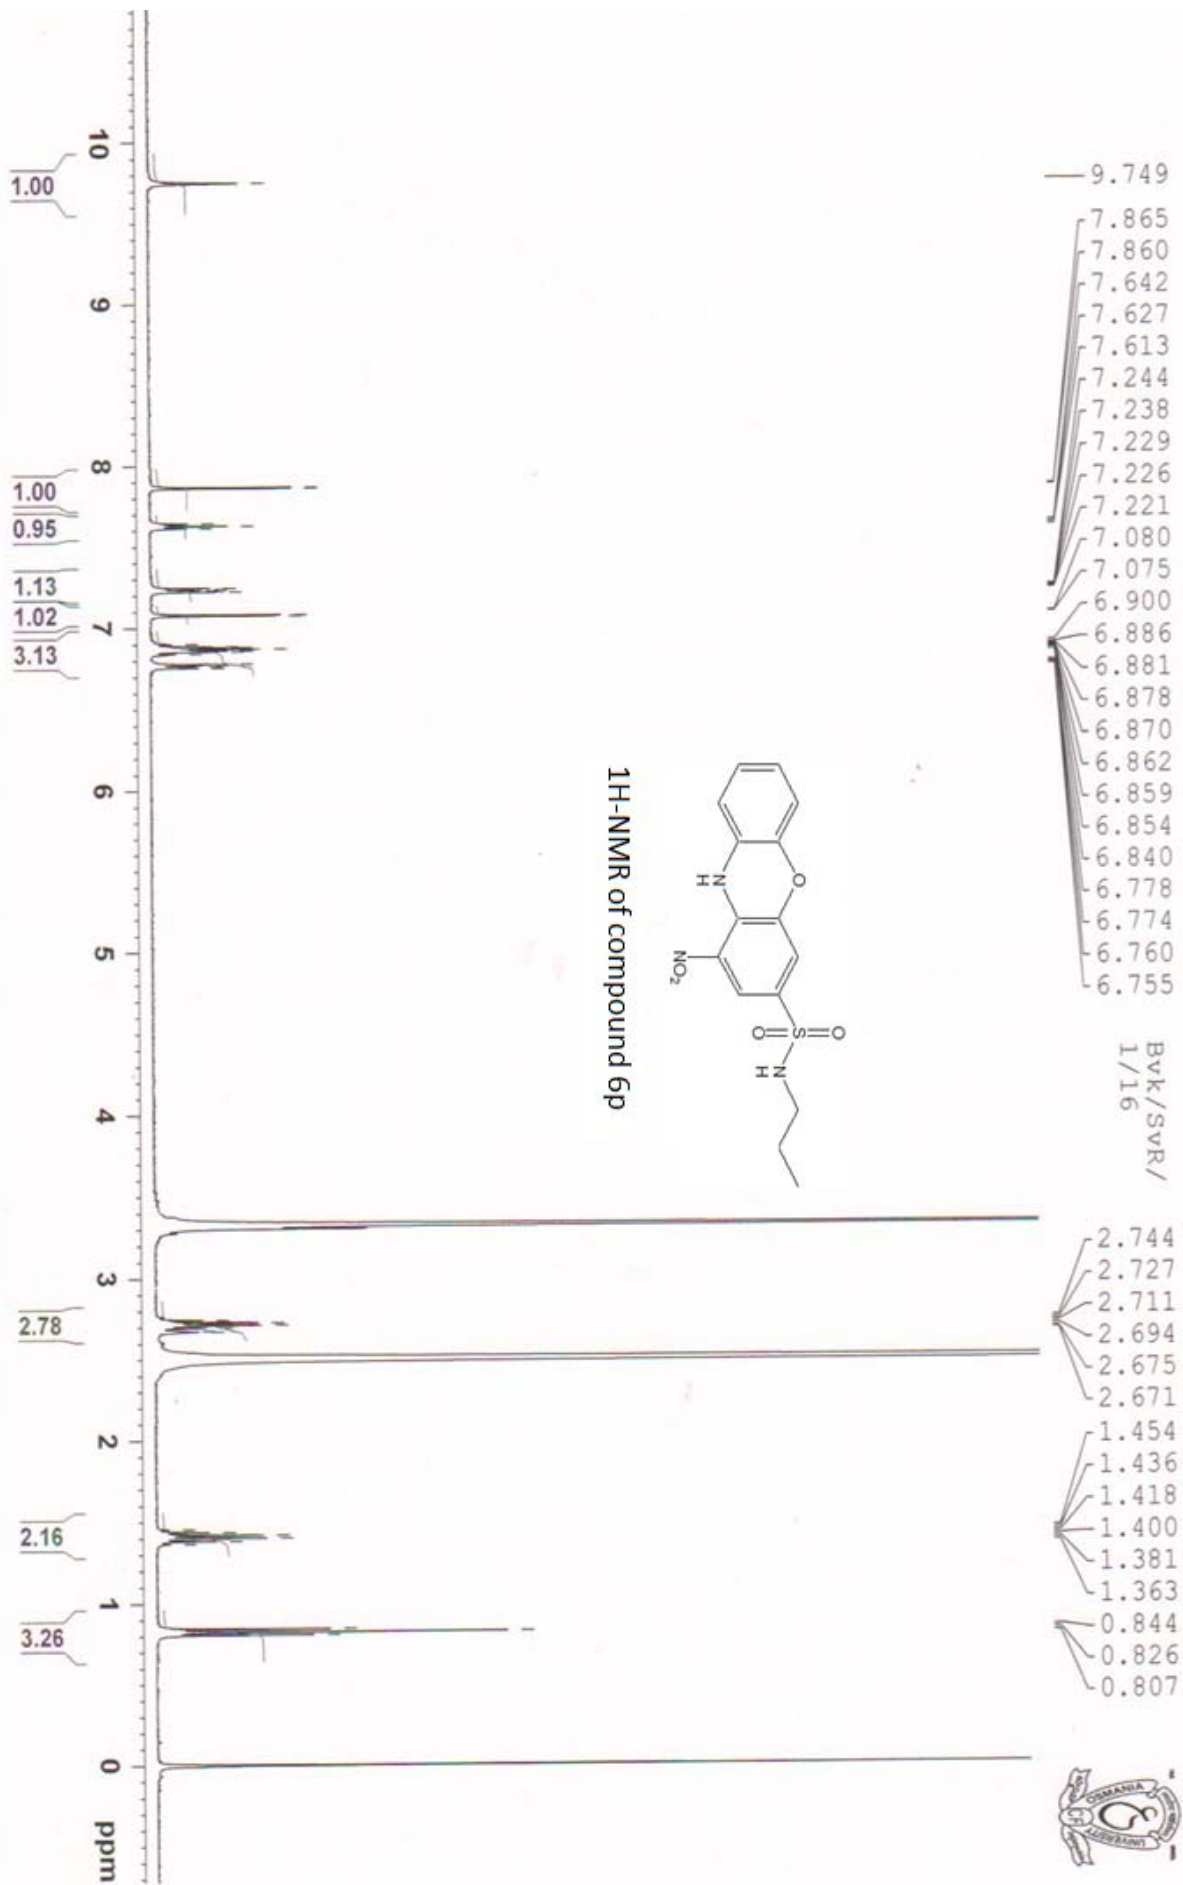

<sup>13</sup>C NMR of compound 6p

DMSO-d<sub>6</sub>

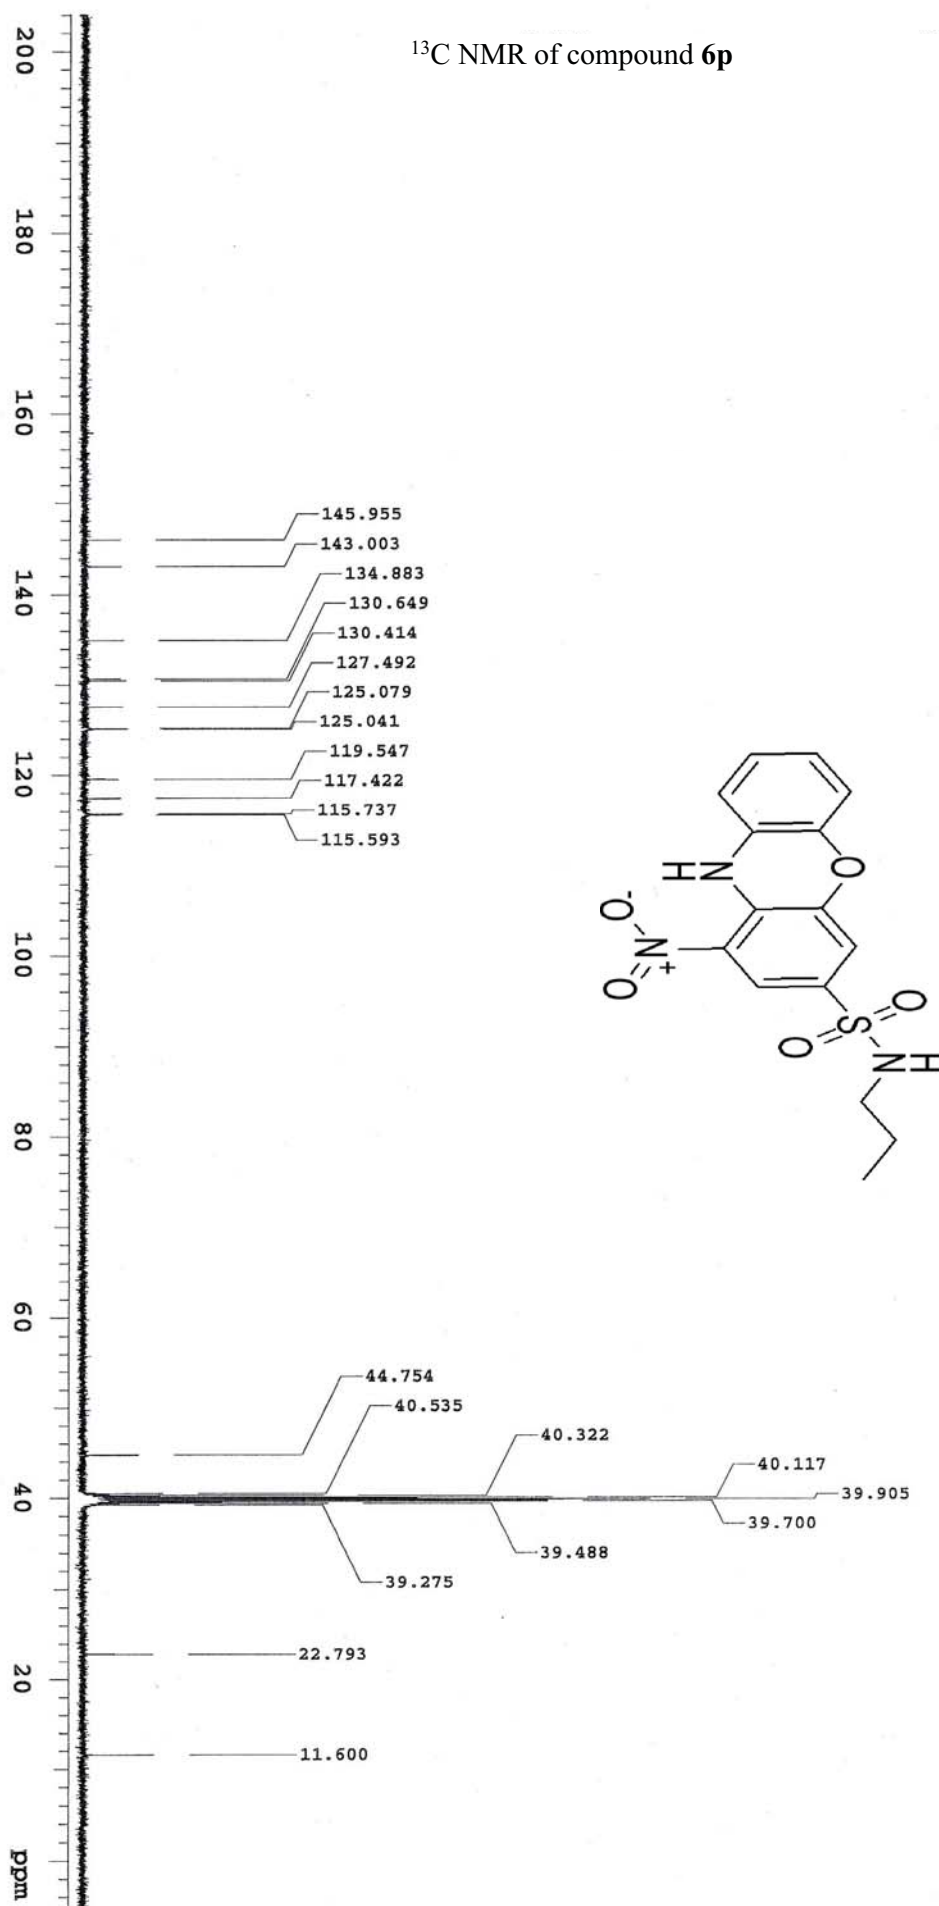

bvk/svr/1/17

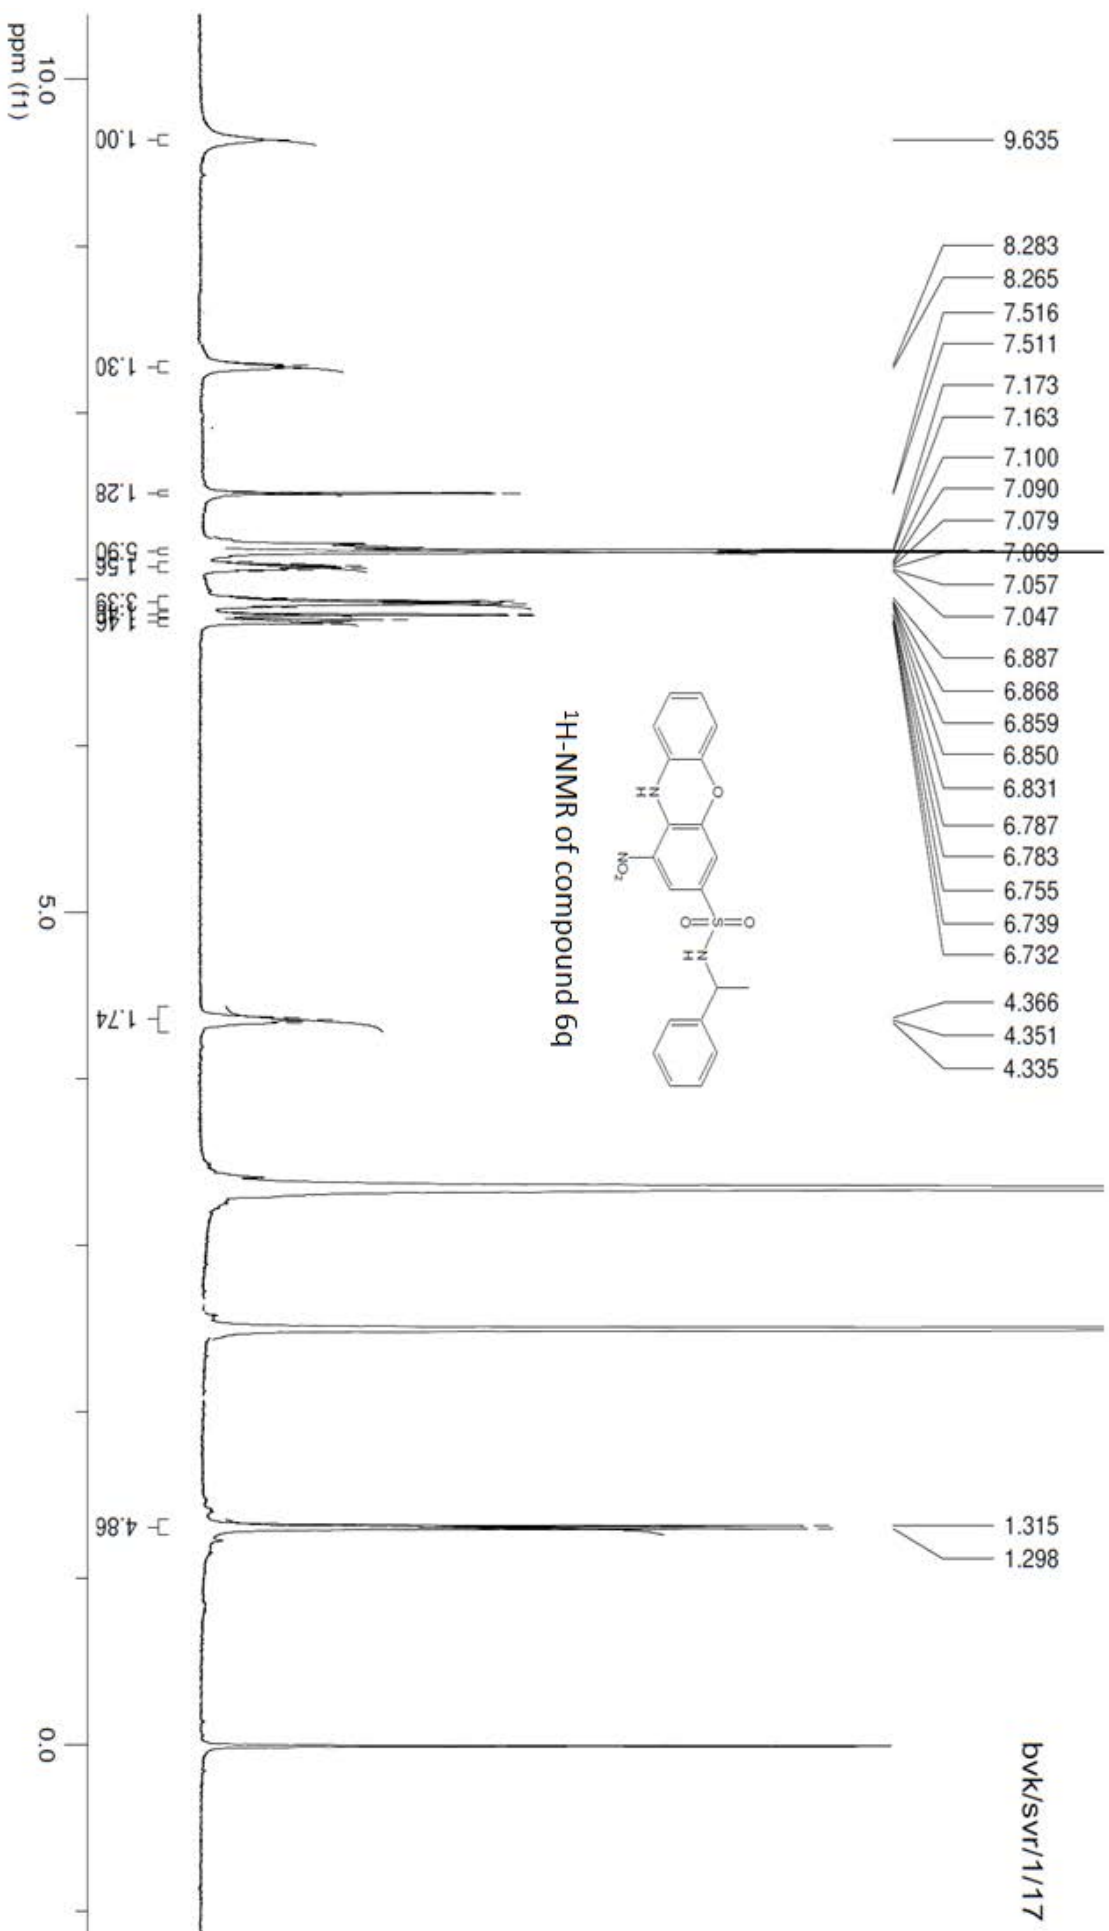

<sup>13</sup>C NMR of compound 6q

DMSO-d<sub>6</sub>

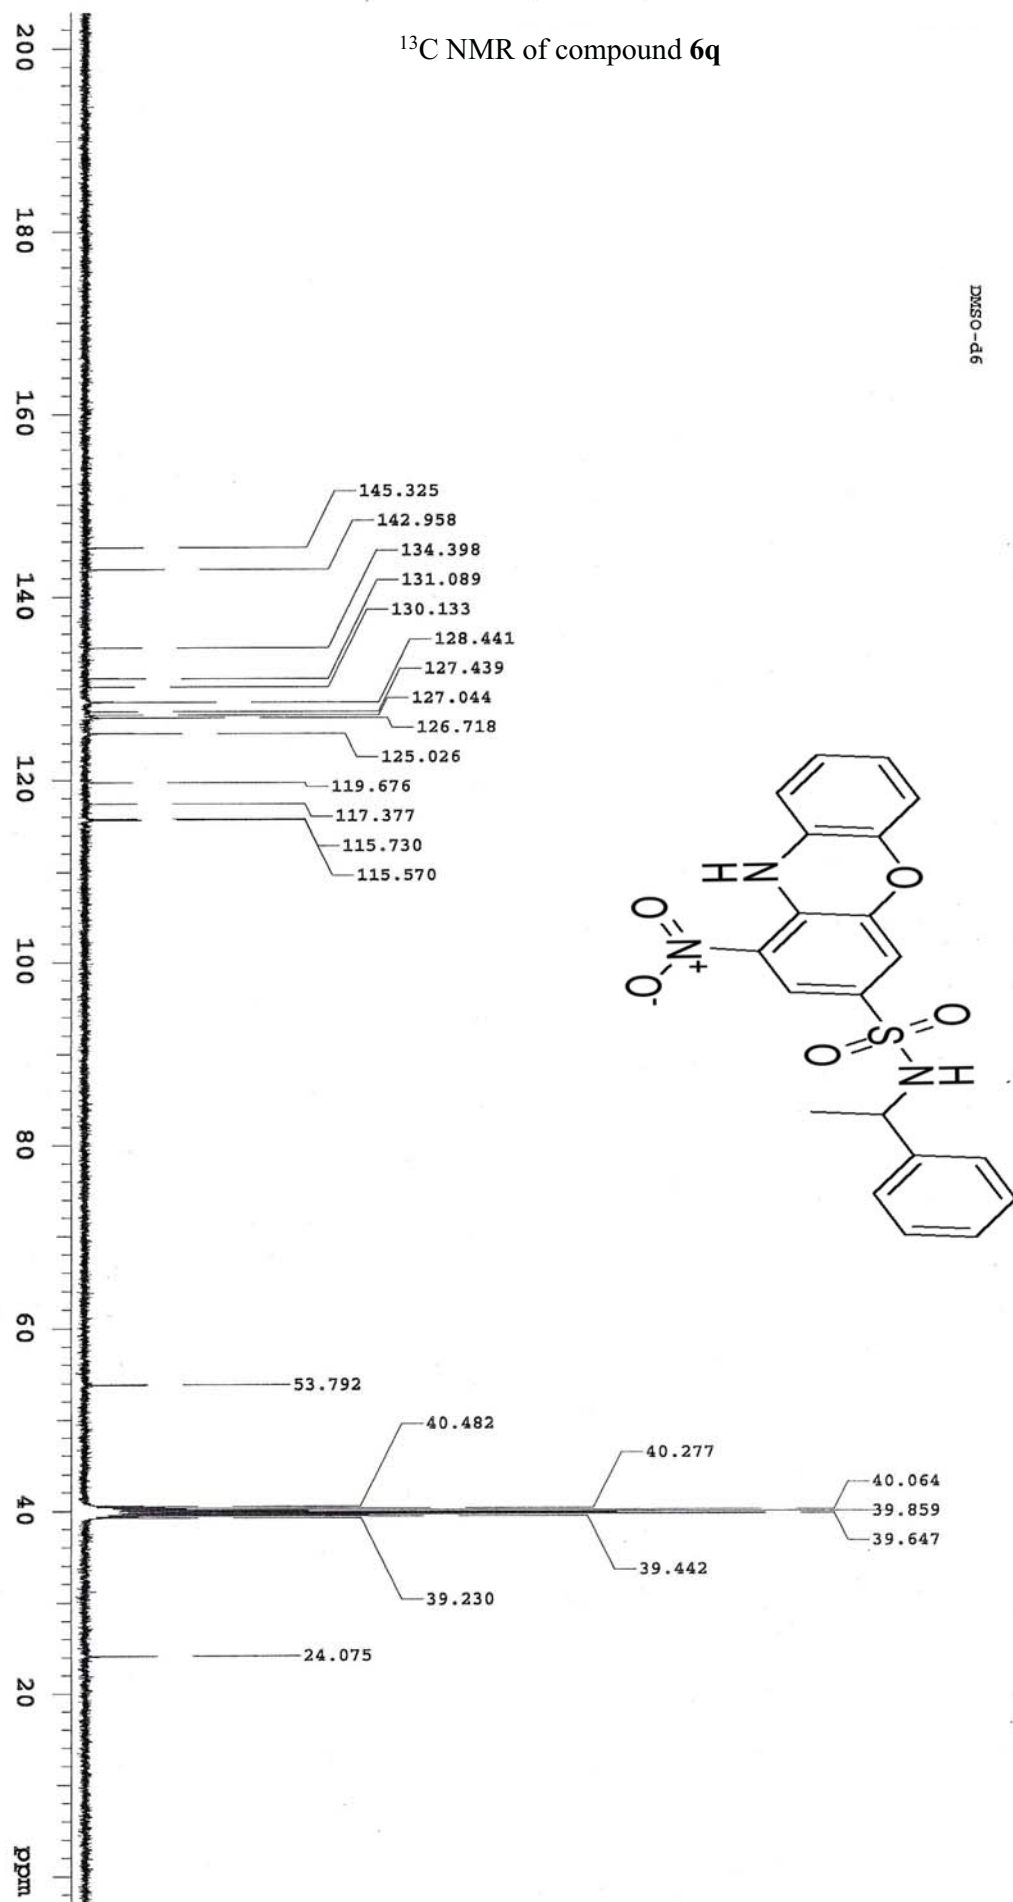

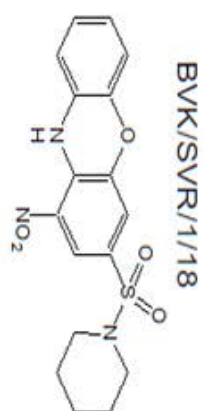

<sup>1</sup>H-NMR of compound 6r

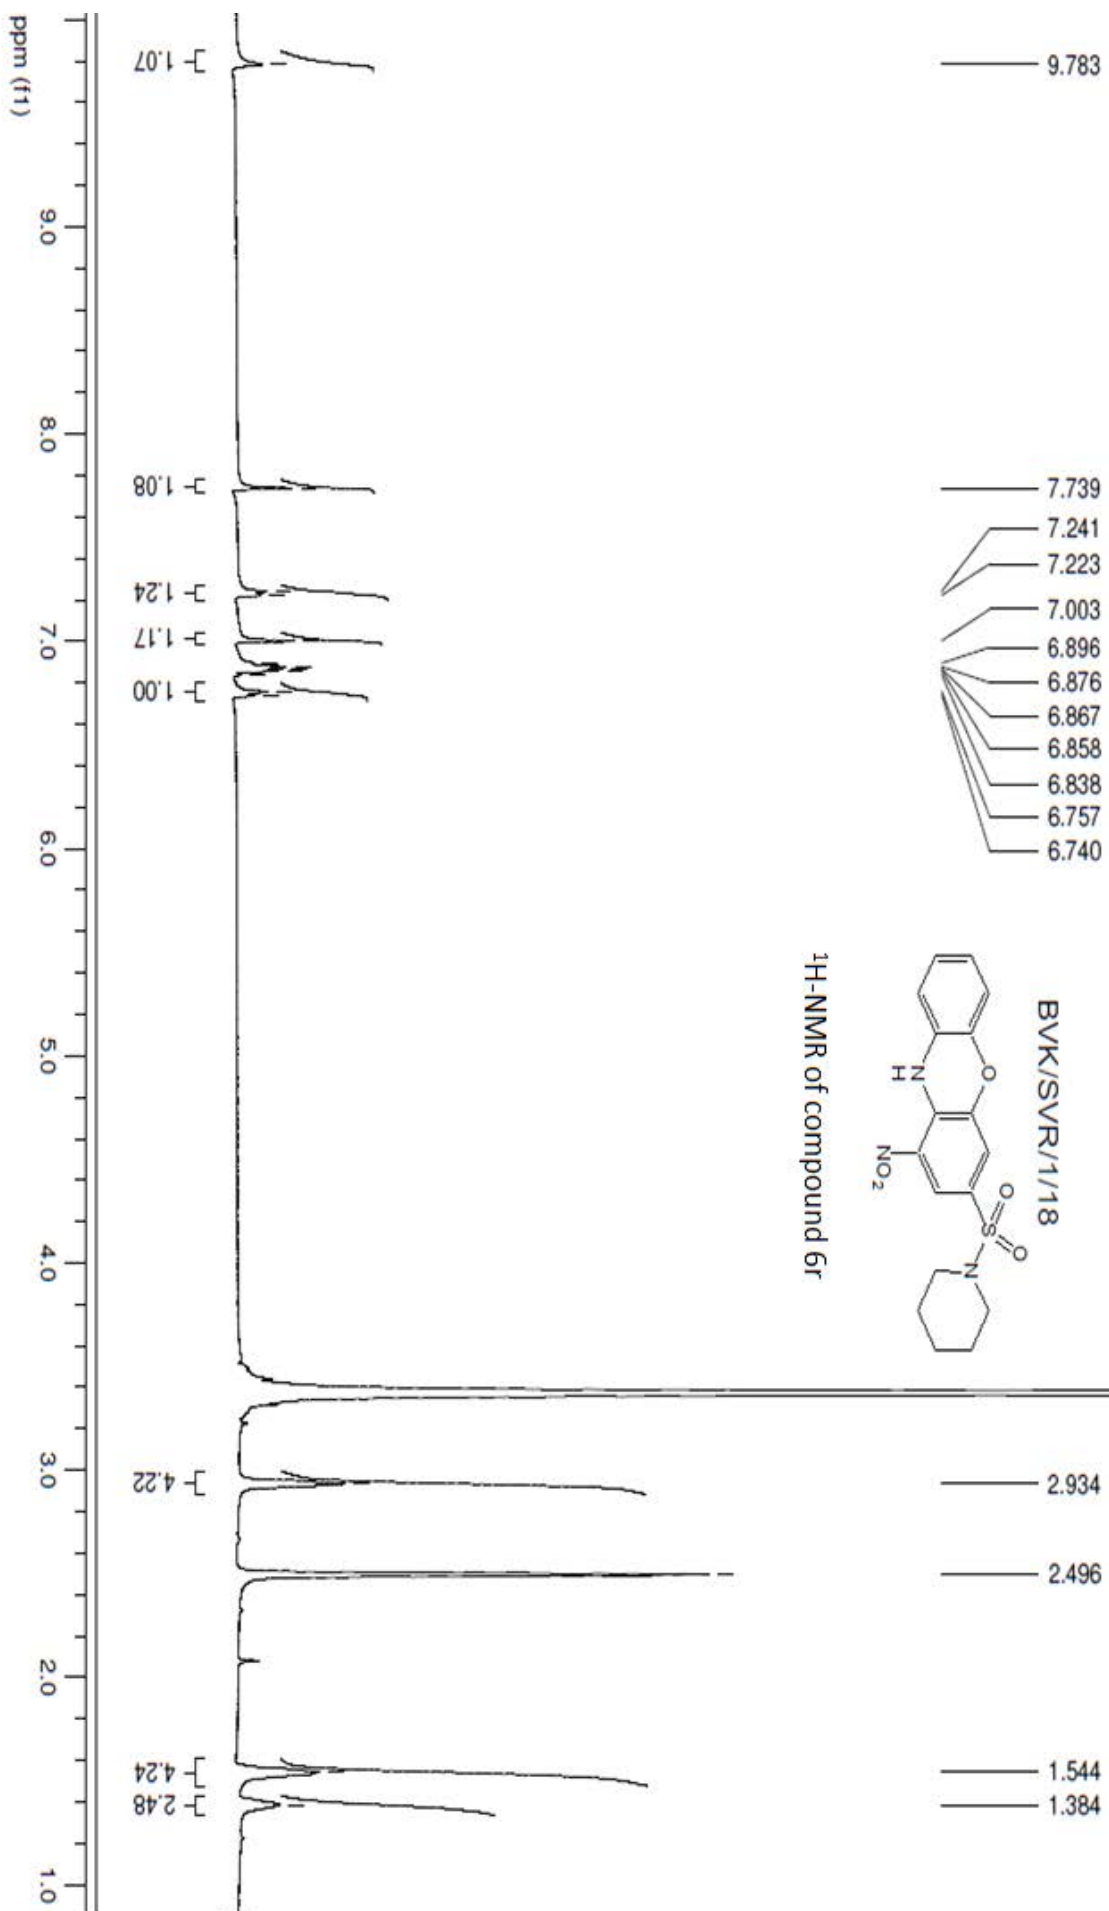



<sup>13</sup>C NMR of compound **6r**

DMSO-d<sub>6</sub>

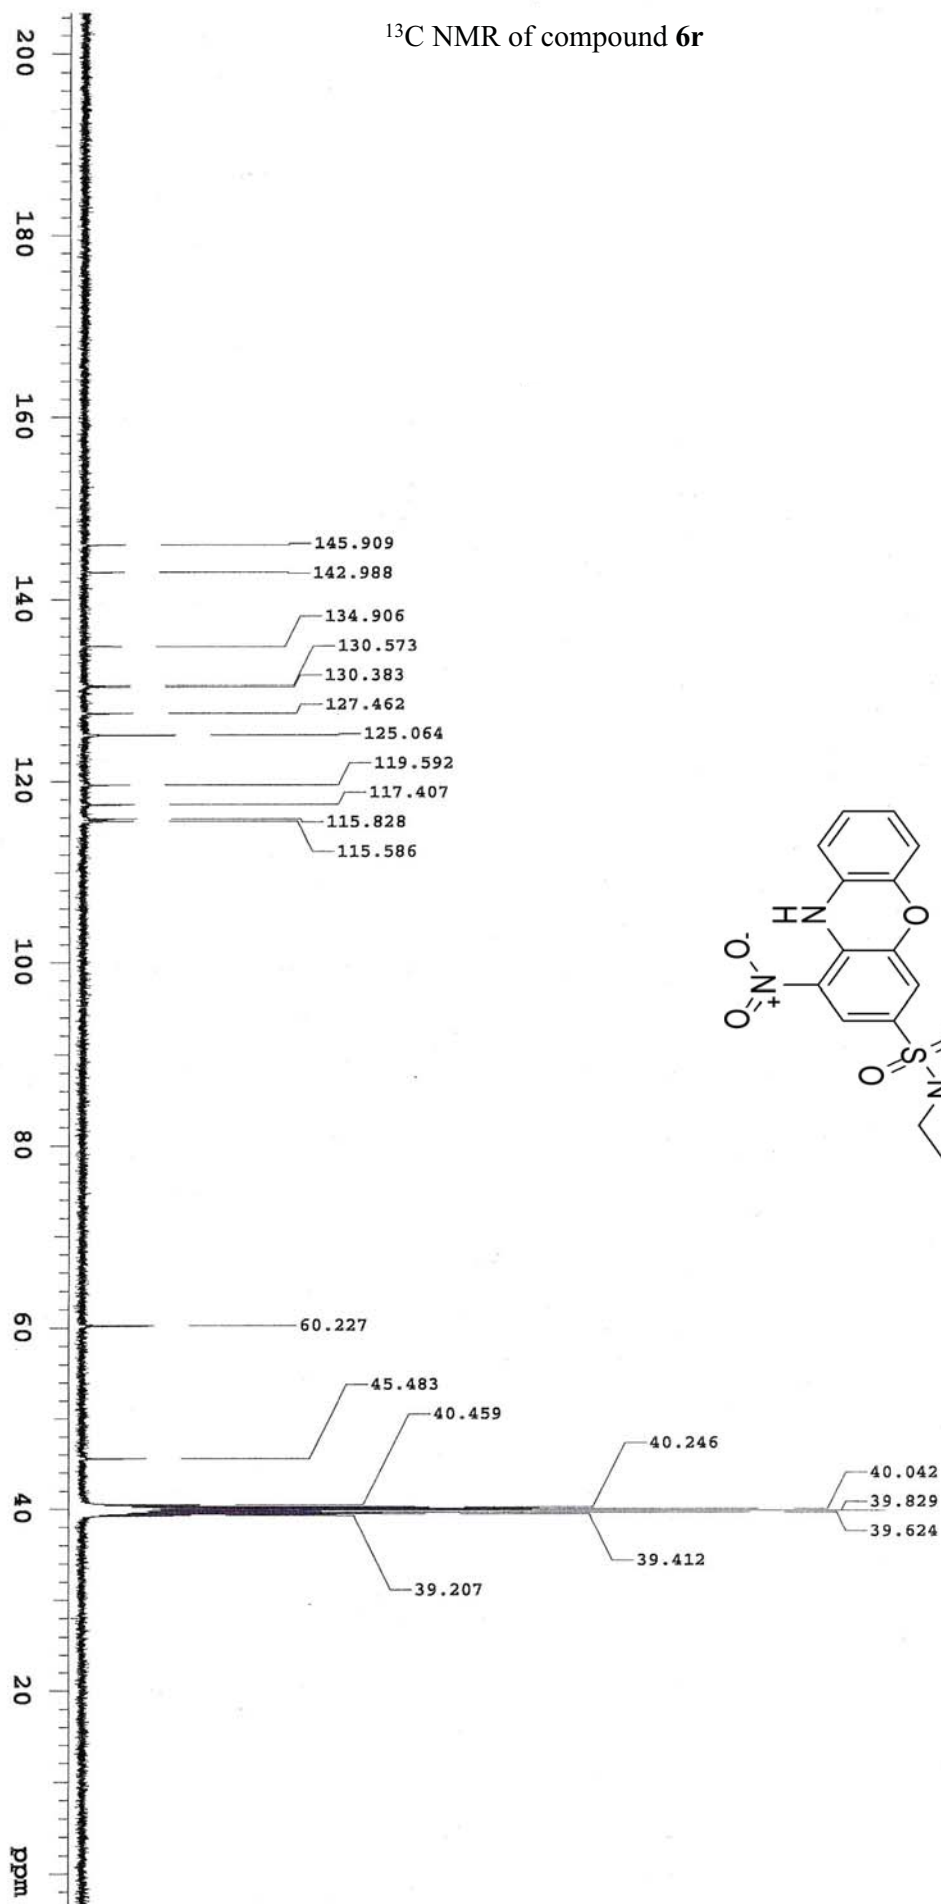

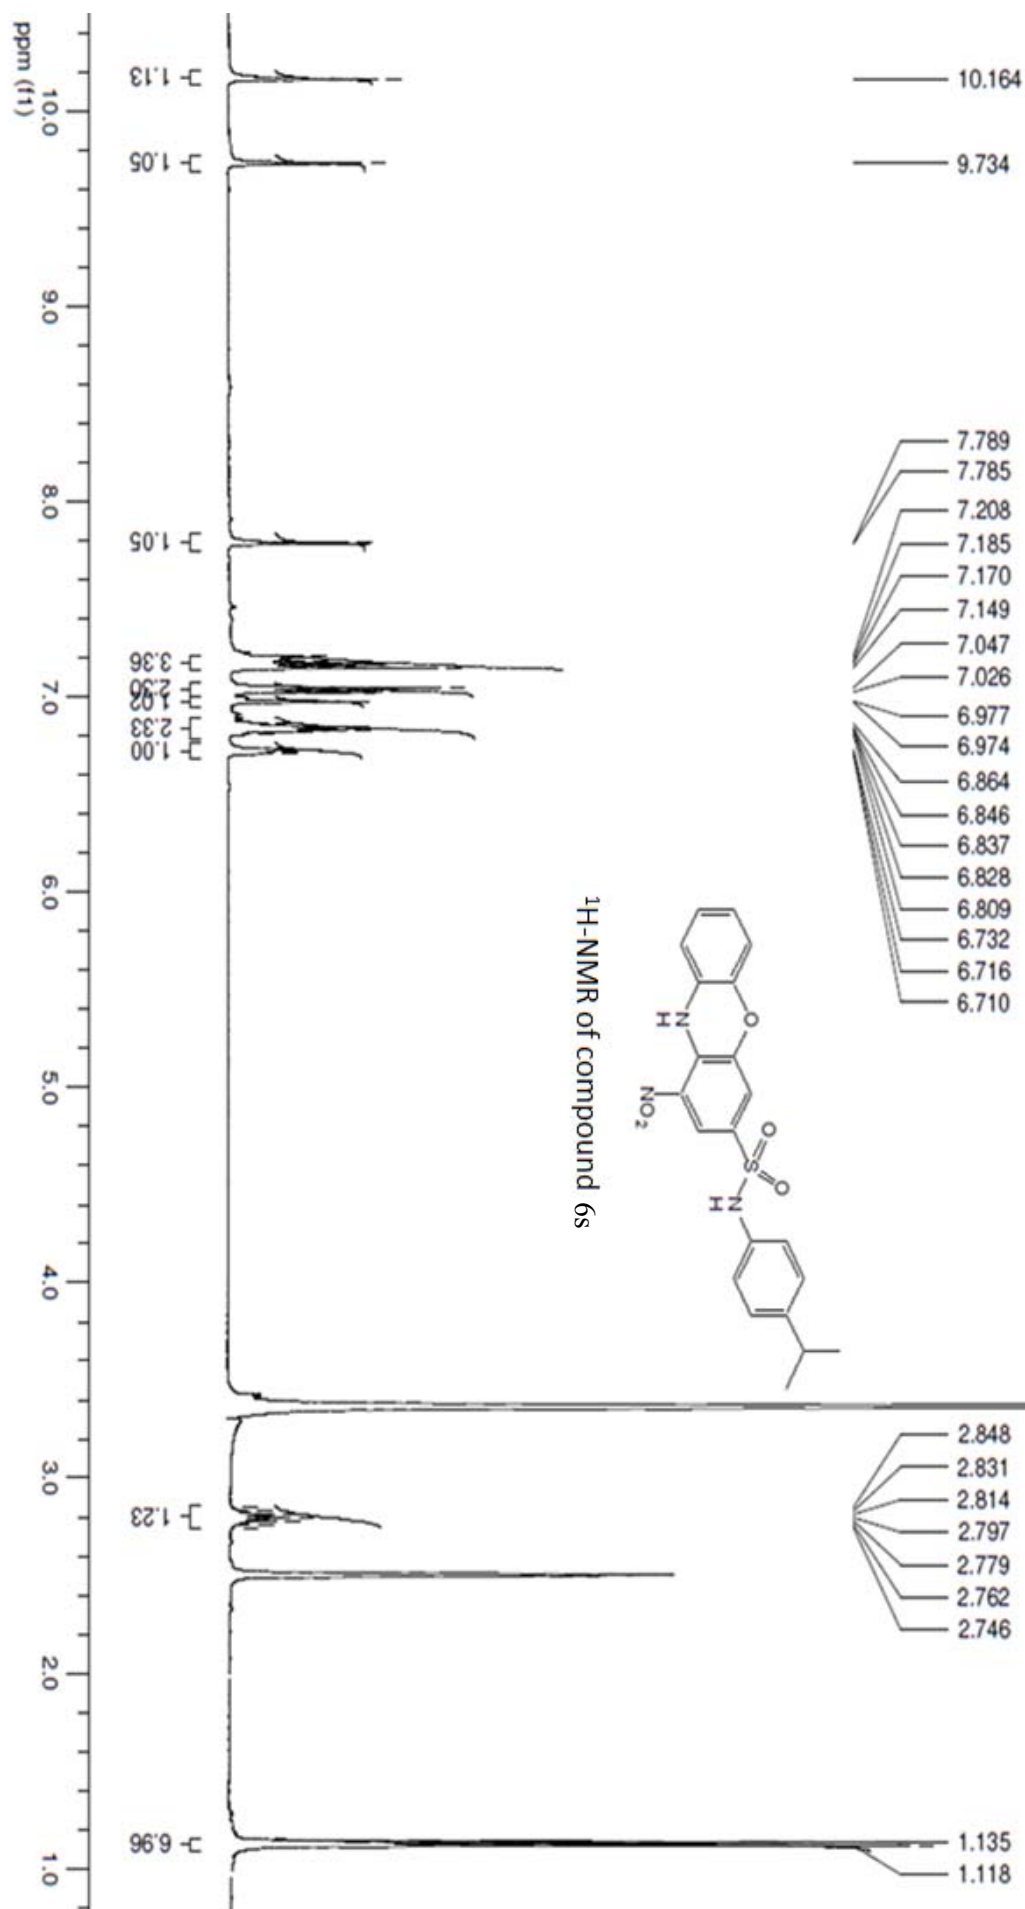

<sup>13</sup>C NMR of compound 6s

DMSO-d<sub>6</sub>

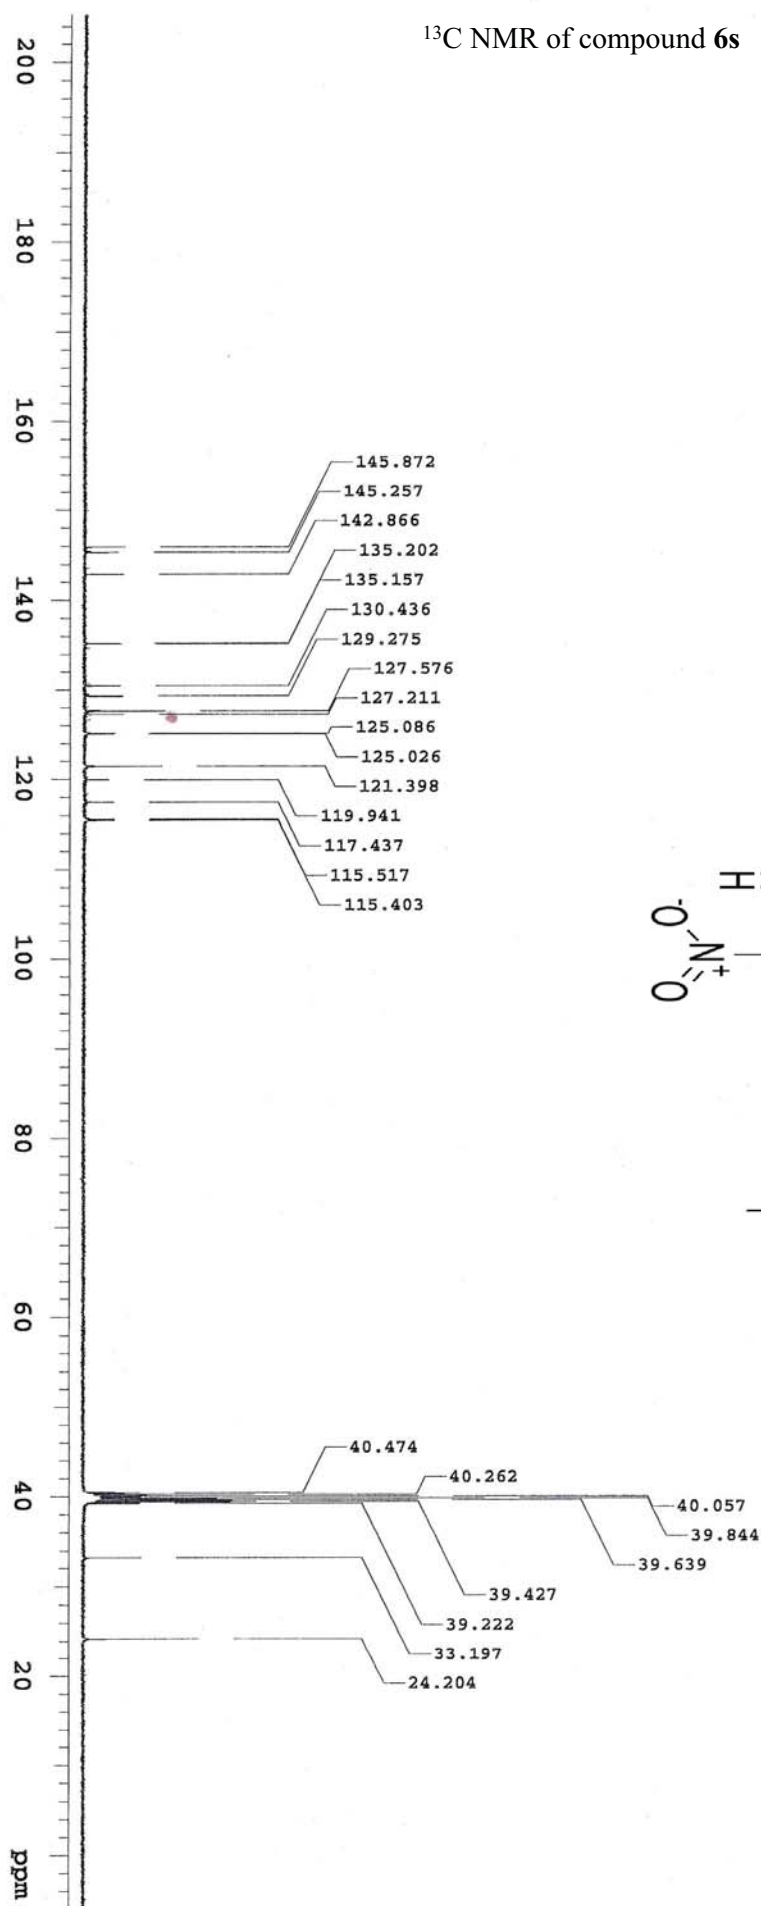

<sup>1</sup>H-NMR of compound 6t

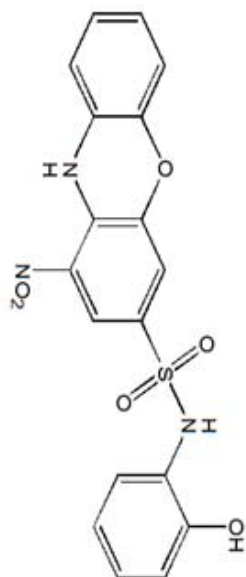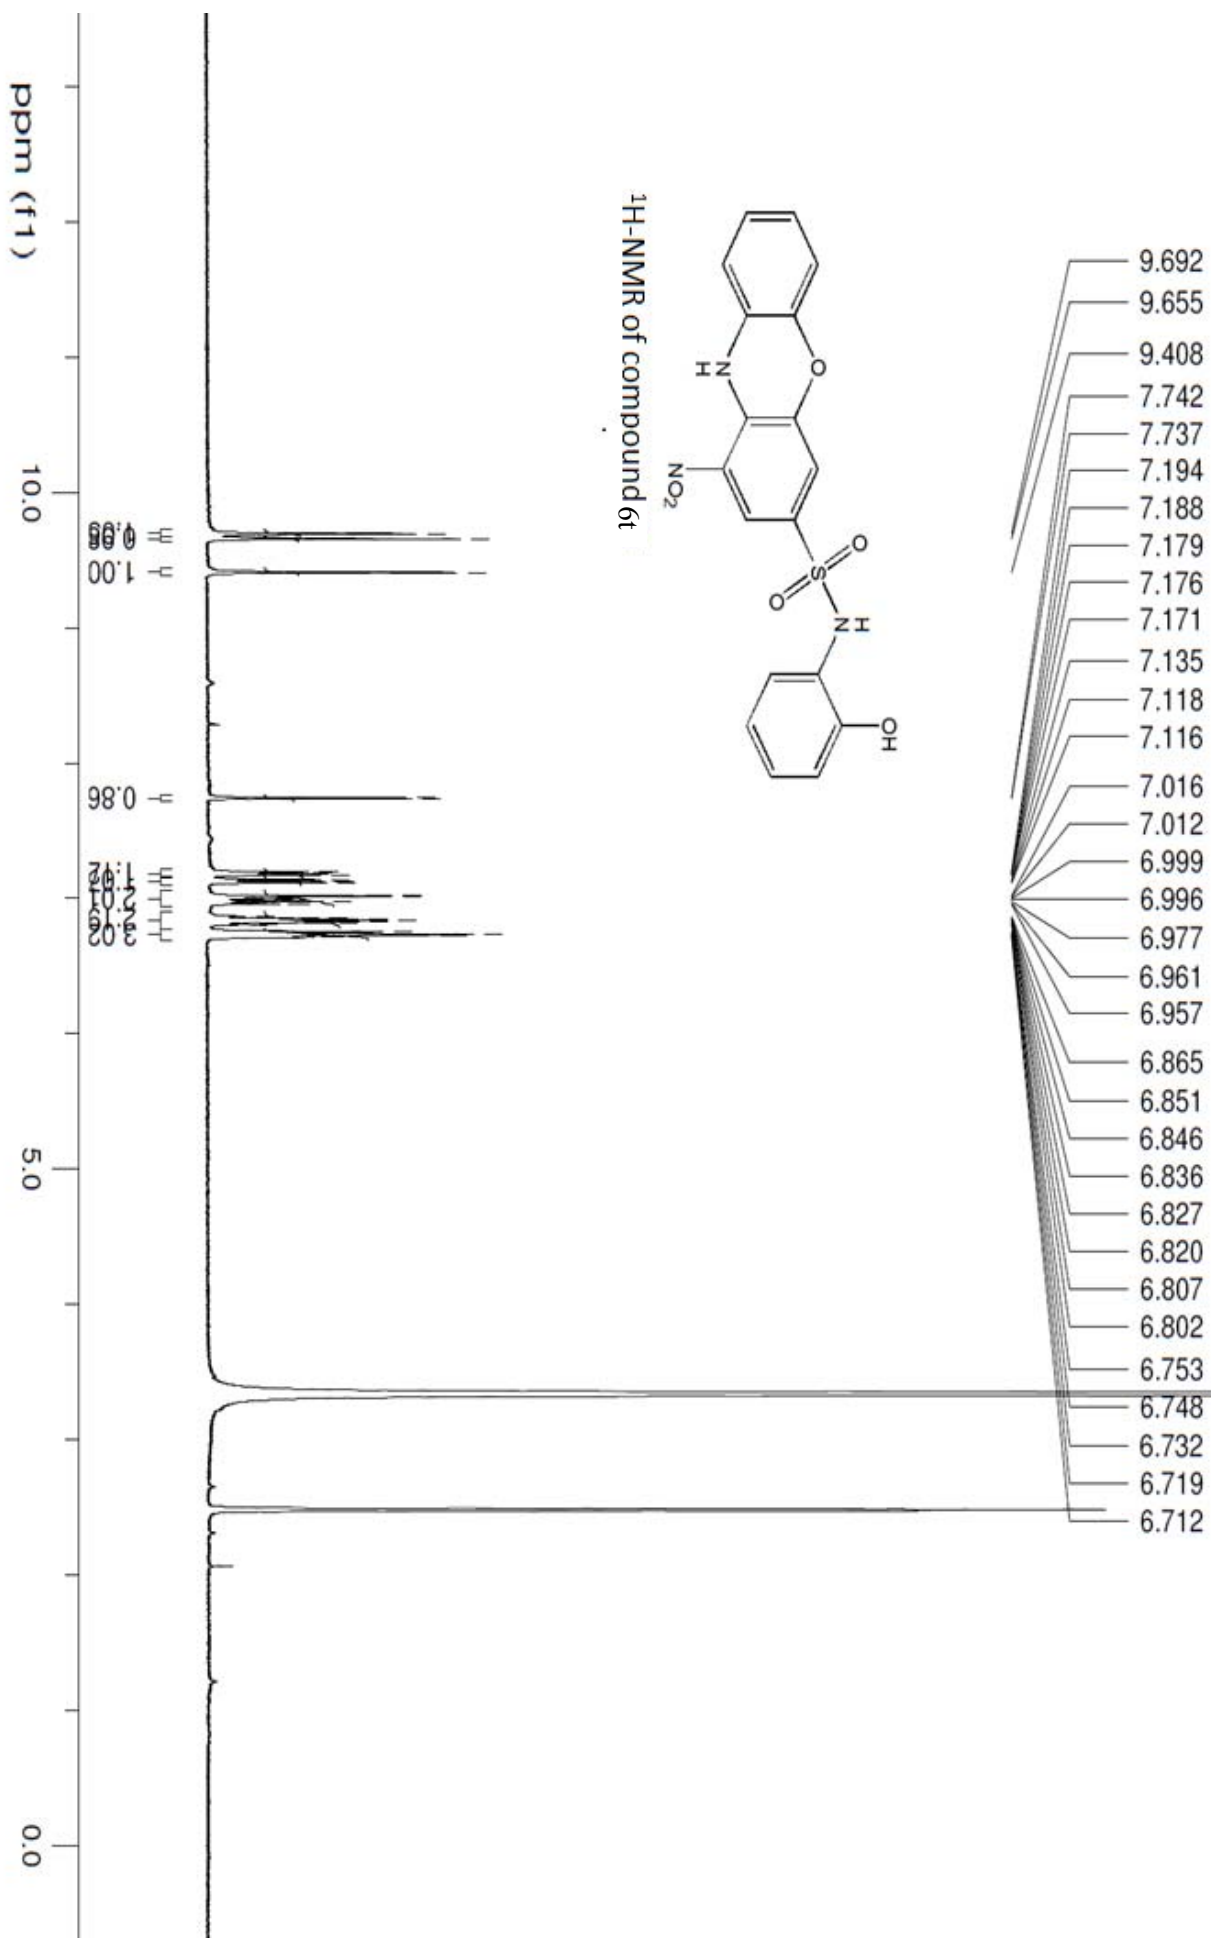

<sup>13</sup>C NMR of compound 6t

DMSO-d<sub>6</sub>

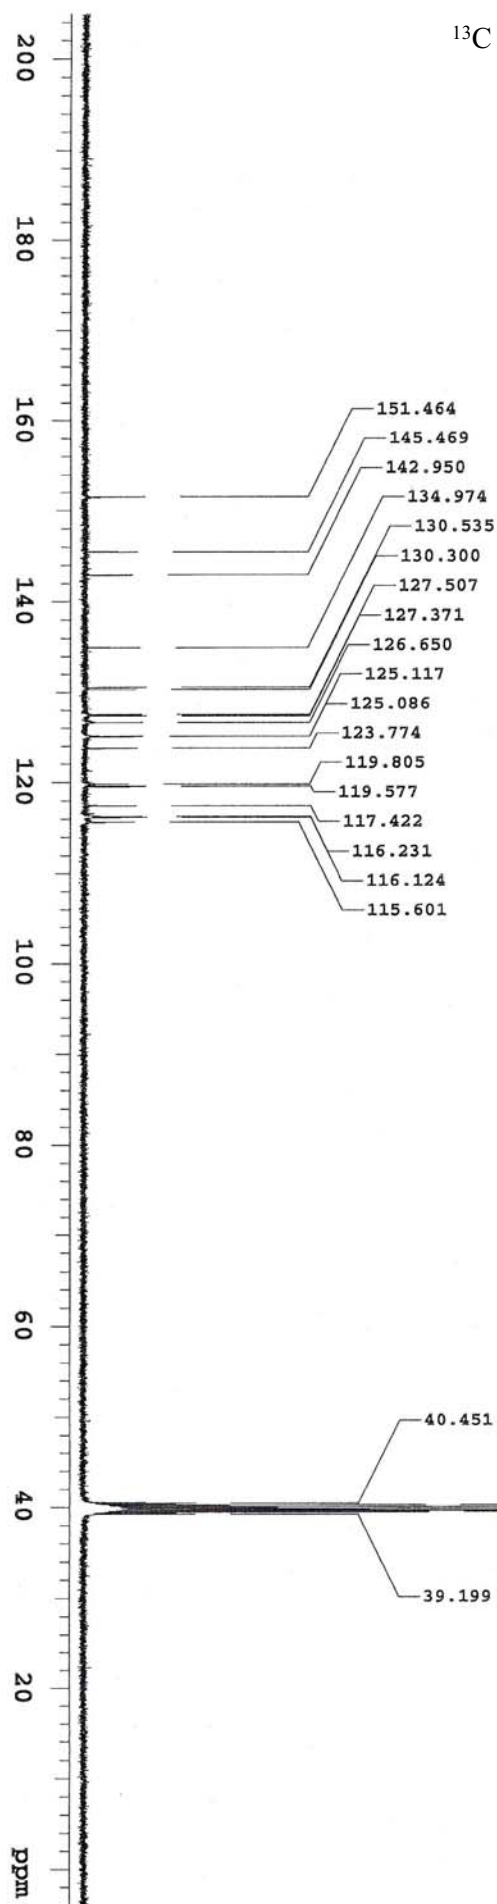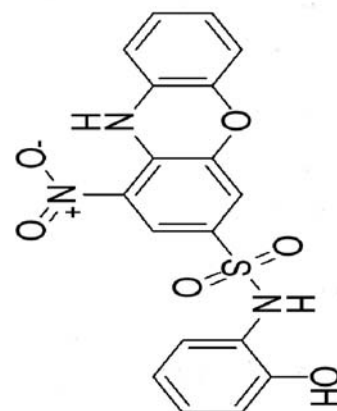

BVK/SVR/1/19

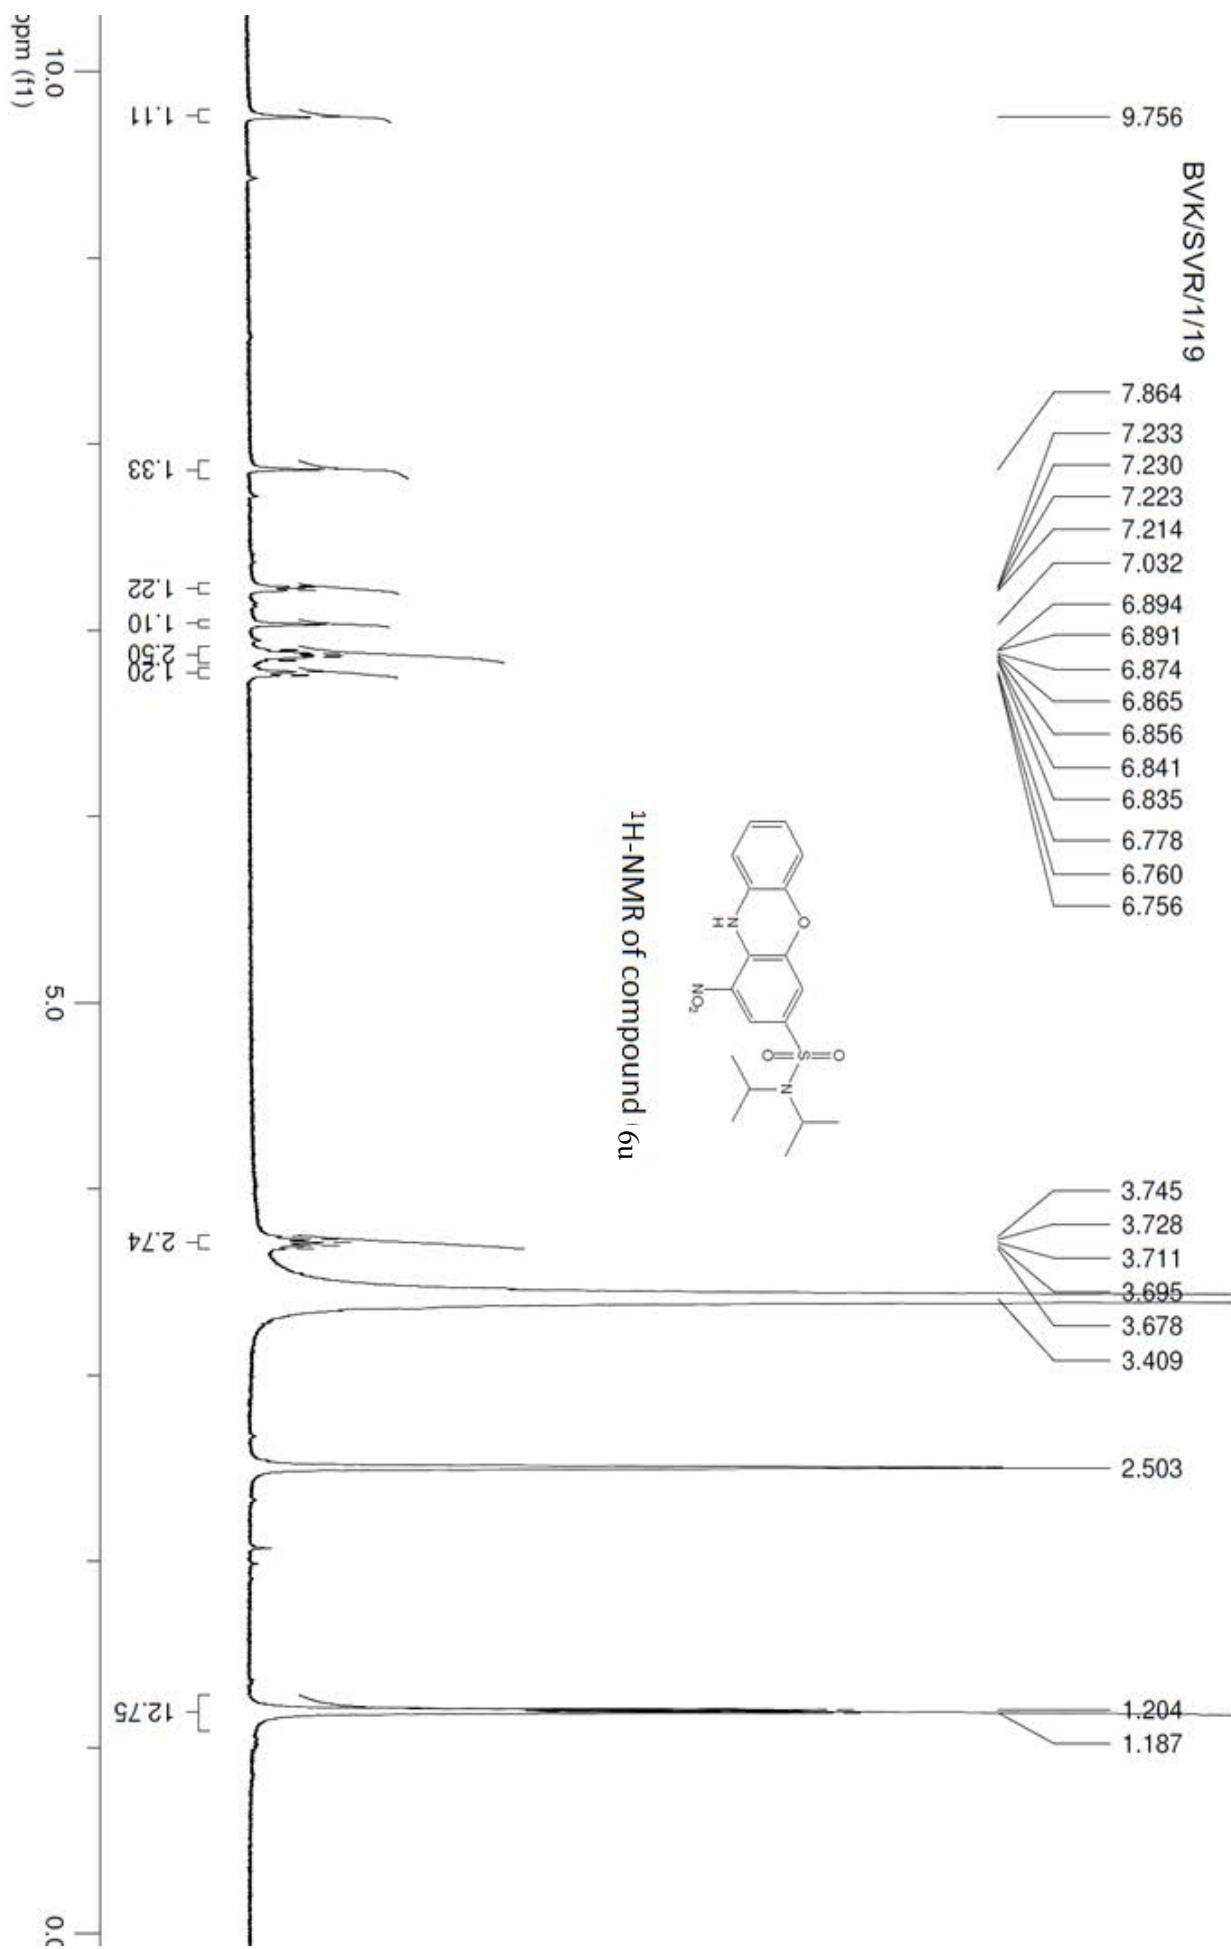

<sup>13</sup>C NMR of compound **6u**

DMSO-d<sub>6</sub>

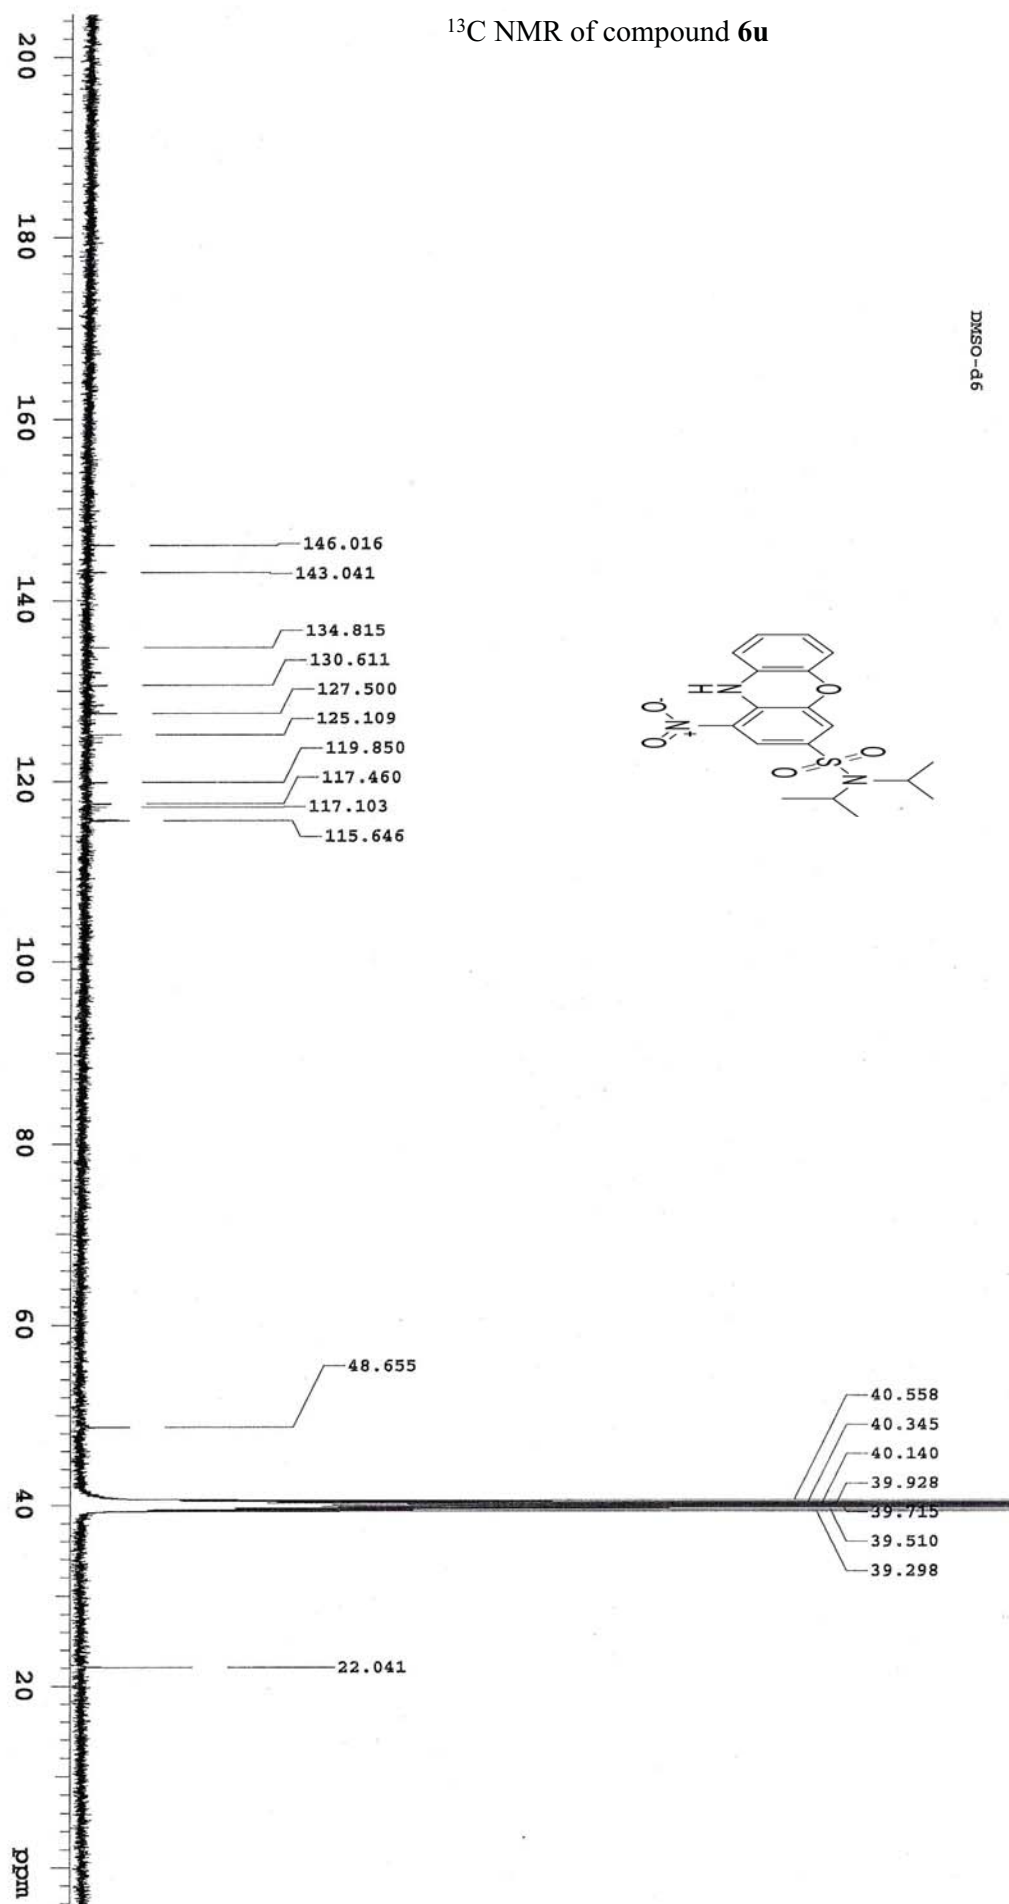

Supplement: c3md00377a4.pdf [file c3md00377a4.pdf]
