# Supplementary material for: Construction of phenoxazine rings containing nitro and sulfonic acid groups leading to phenoxazine-3-sulfonamide derivatives: their evaluation as novel and potential insulin secretagogues
Source: Royal Society of Chemistry journal article supplement (doi:10.1039/c3md00377a), 2014-01-01
Supplement: c3md00377a2.pdf [file c3md00377a2.pdf]

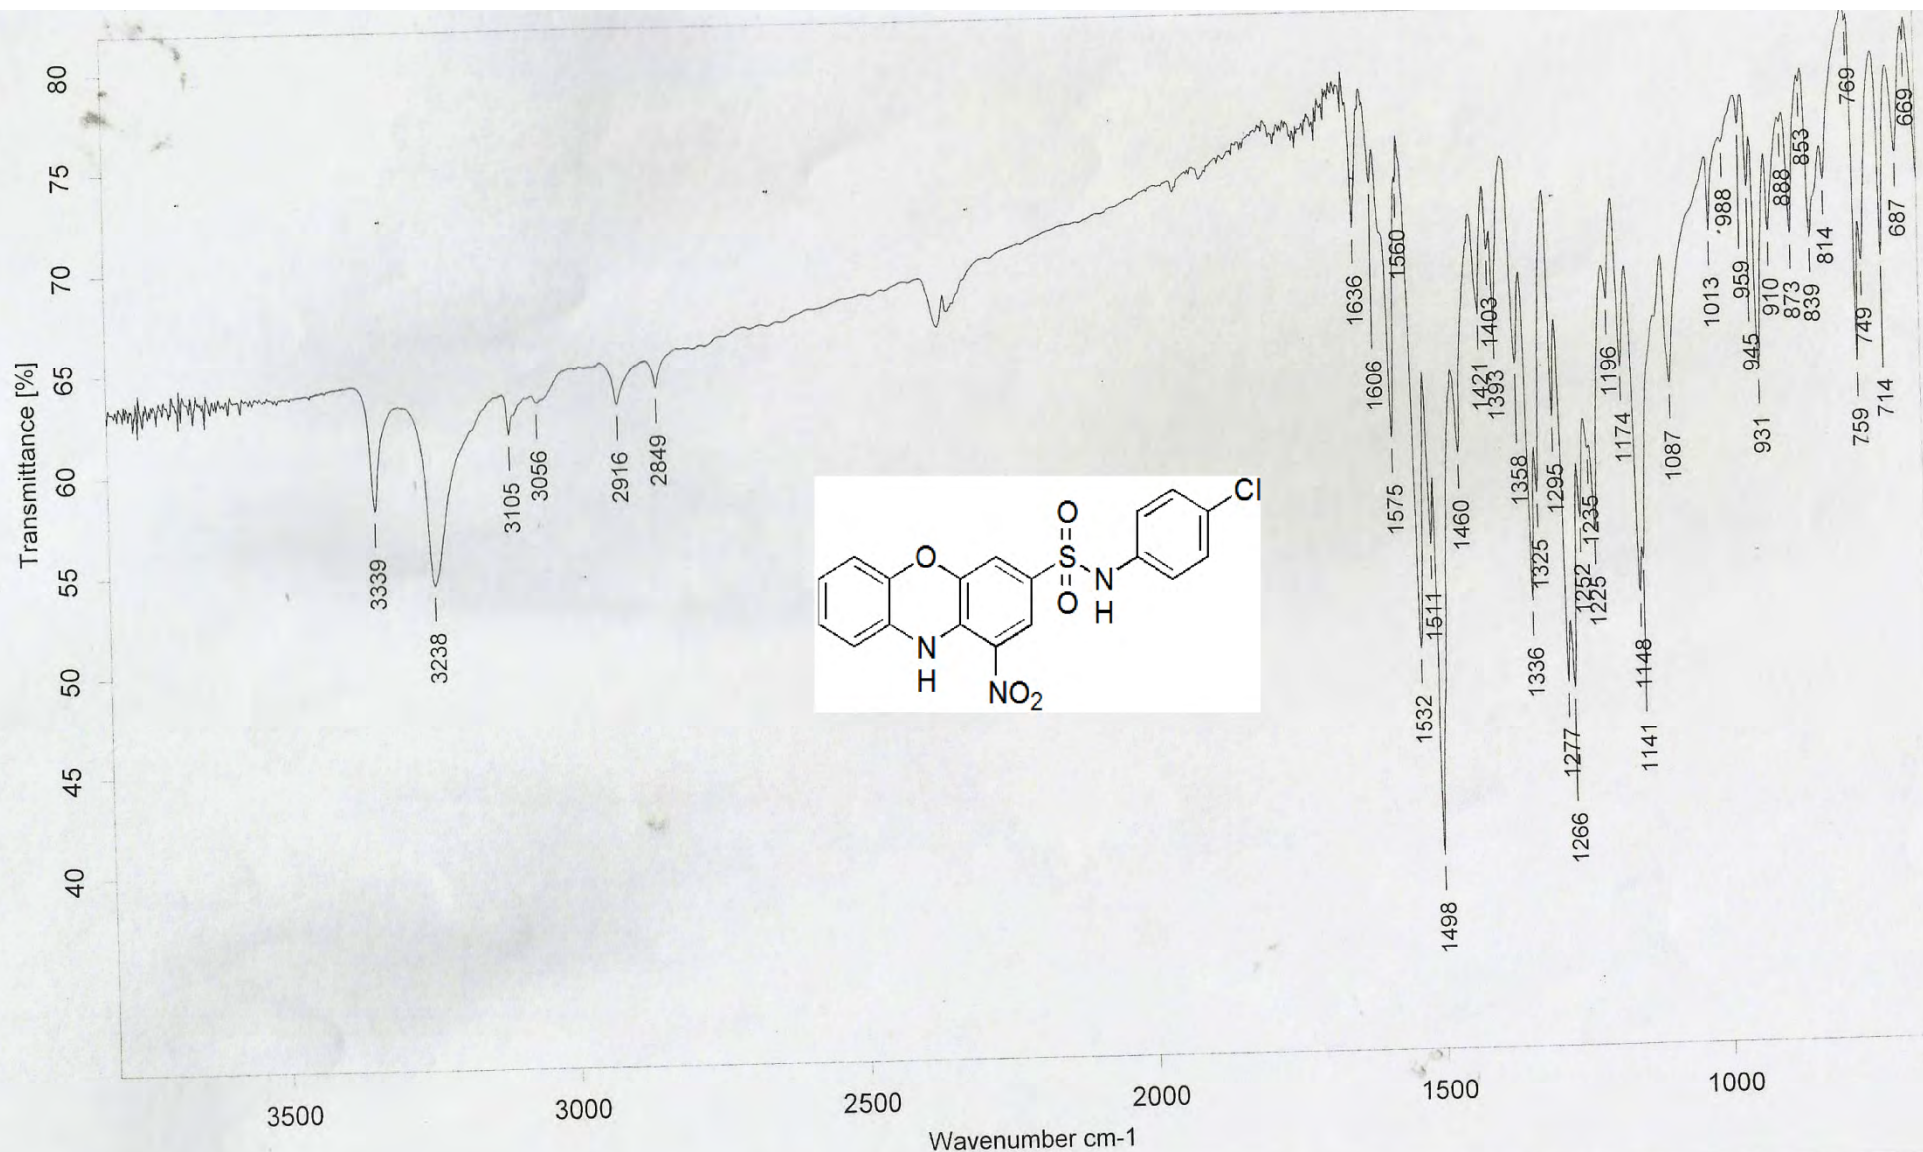

|                                   |                               |                                                    |
|-----------------------------------|-------------------------------|----------------------------------------------------|
| Sample Name: 6 b 417.8            | Sample Form: Pellet           | File Name: III21121307.0                           |
| Sample Scans: 16                  | Resolution: 2                 | Experiment: Symed.MIR_TR.XPM                       |
| Date of Measurement: 21/12/2013   | Time of Measurement: 11:28:46 | Path of File: D:\OPUS\DATA-2013\December\III211213 |
| Analysed By: Divyateja 21.12.2013 | Operator Name: Divya Teja     | Checked By: Divya Teja 21/12/2013                  |



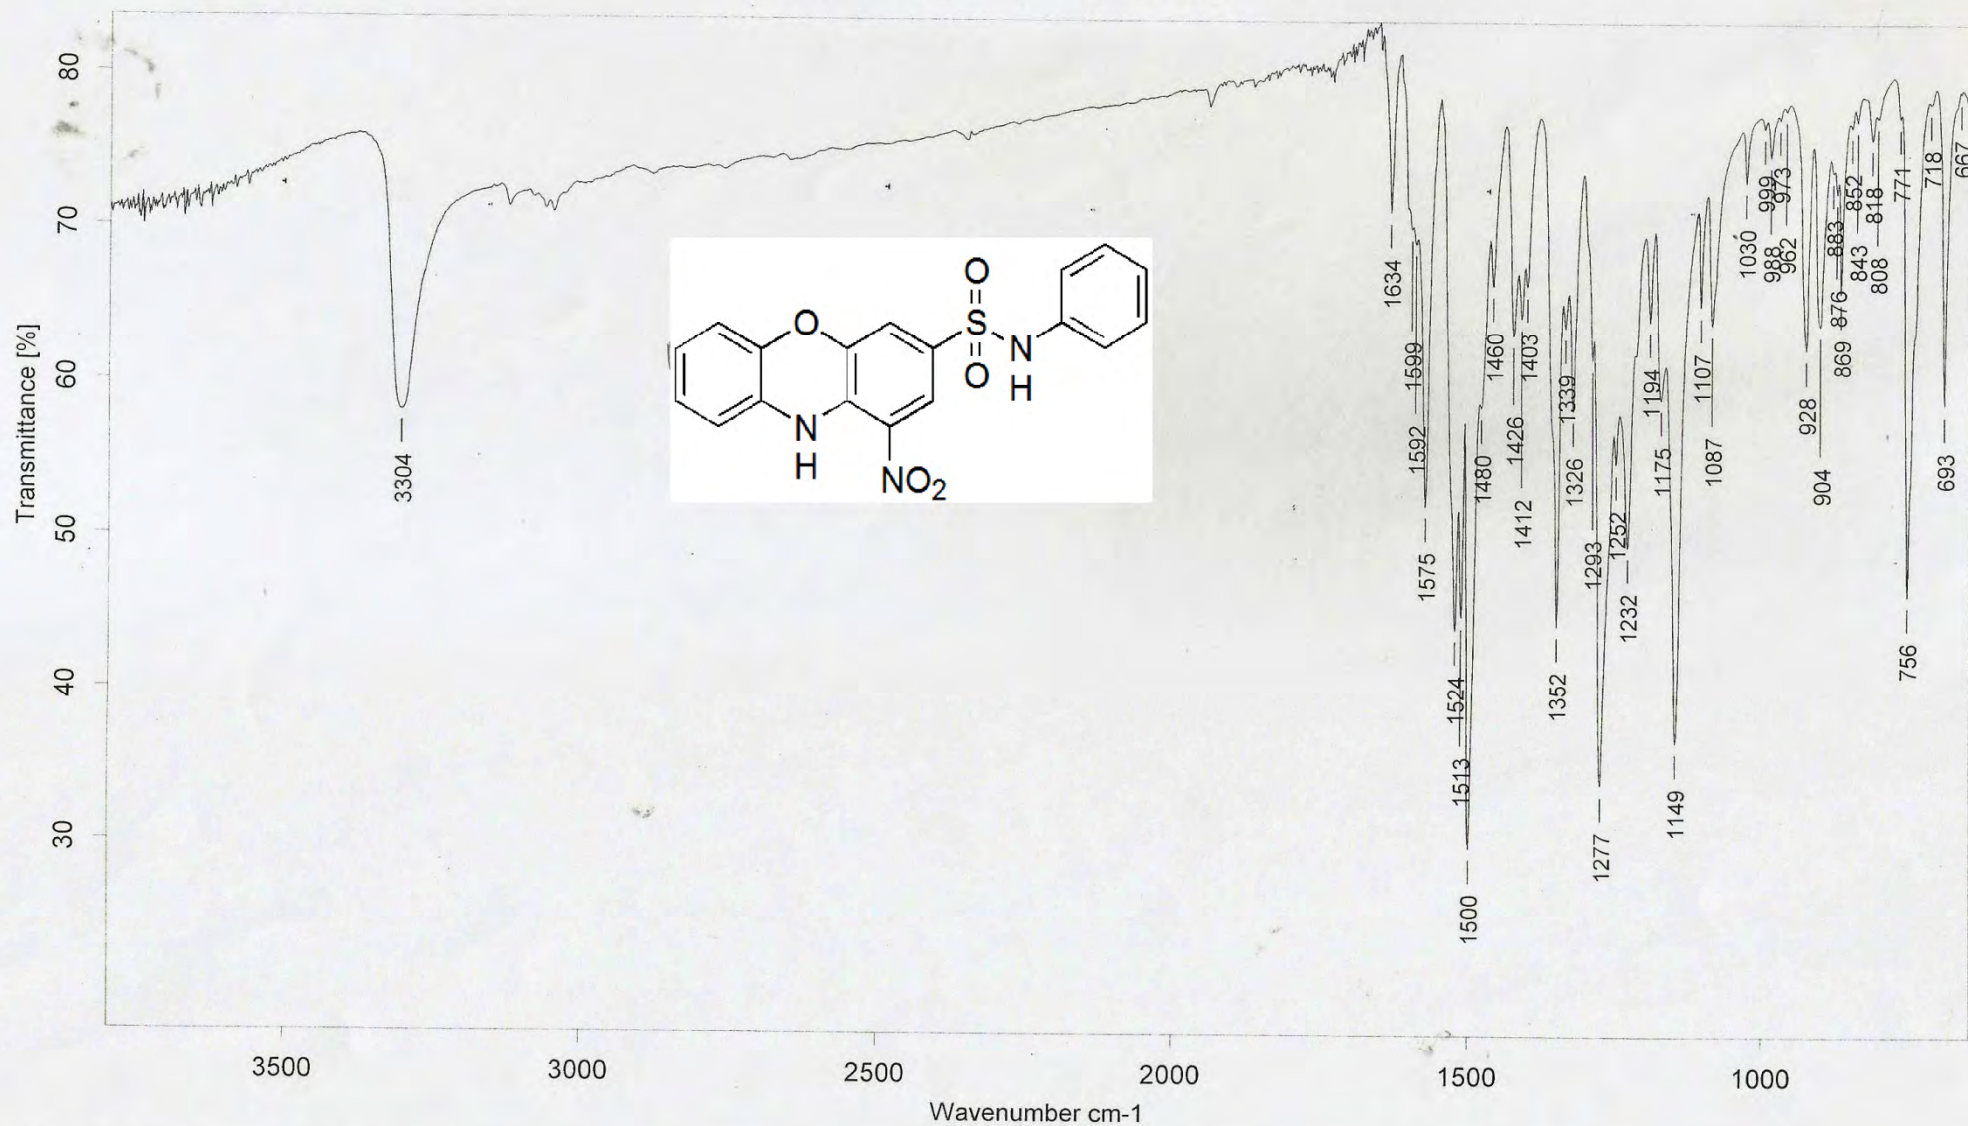

|                                   |                               |                                                    |
|-----------------------------------|-------------------------------|----------------------------------------------------|
| Sample Name: 6 e M.383            | Sample Form: Pellet           | File Name: III21121311.0                           |
| Sample Scans: 16                  | Resolution: 2                 | Experiment: Symed.MIR_TR.XPM                       |
| Date of Measurement: 21/12/2013   | Time of Measurement: 13:33:38 | Path of File: D:\OPUS\DATA-2013\December\III211213 |
| Analysed By: Divyateja 21.12.2013 | Operator Name: Divya Teja     | Checked By: Divya Teja 21/12/2013                  |



# SYMED RESEARCH CENTRE

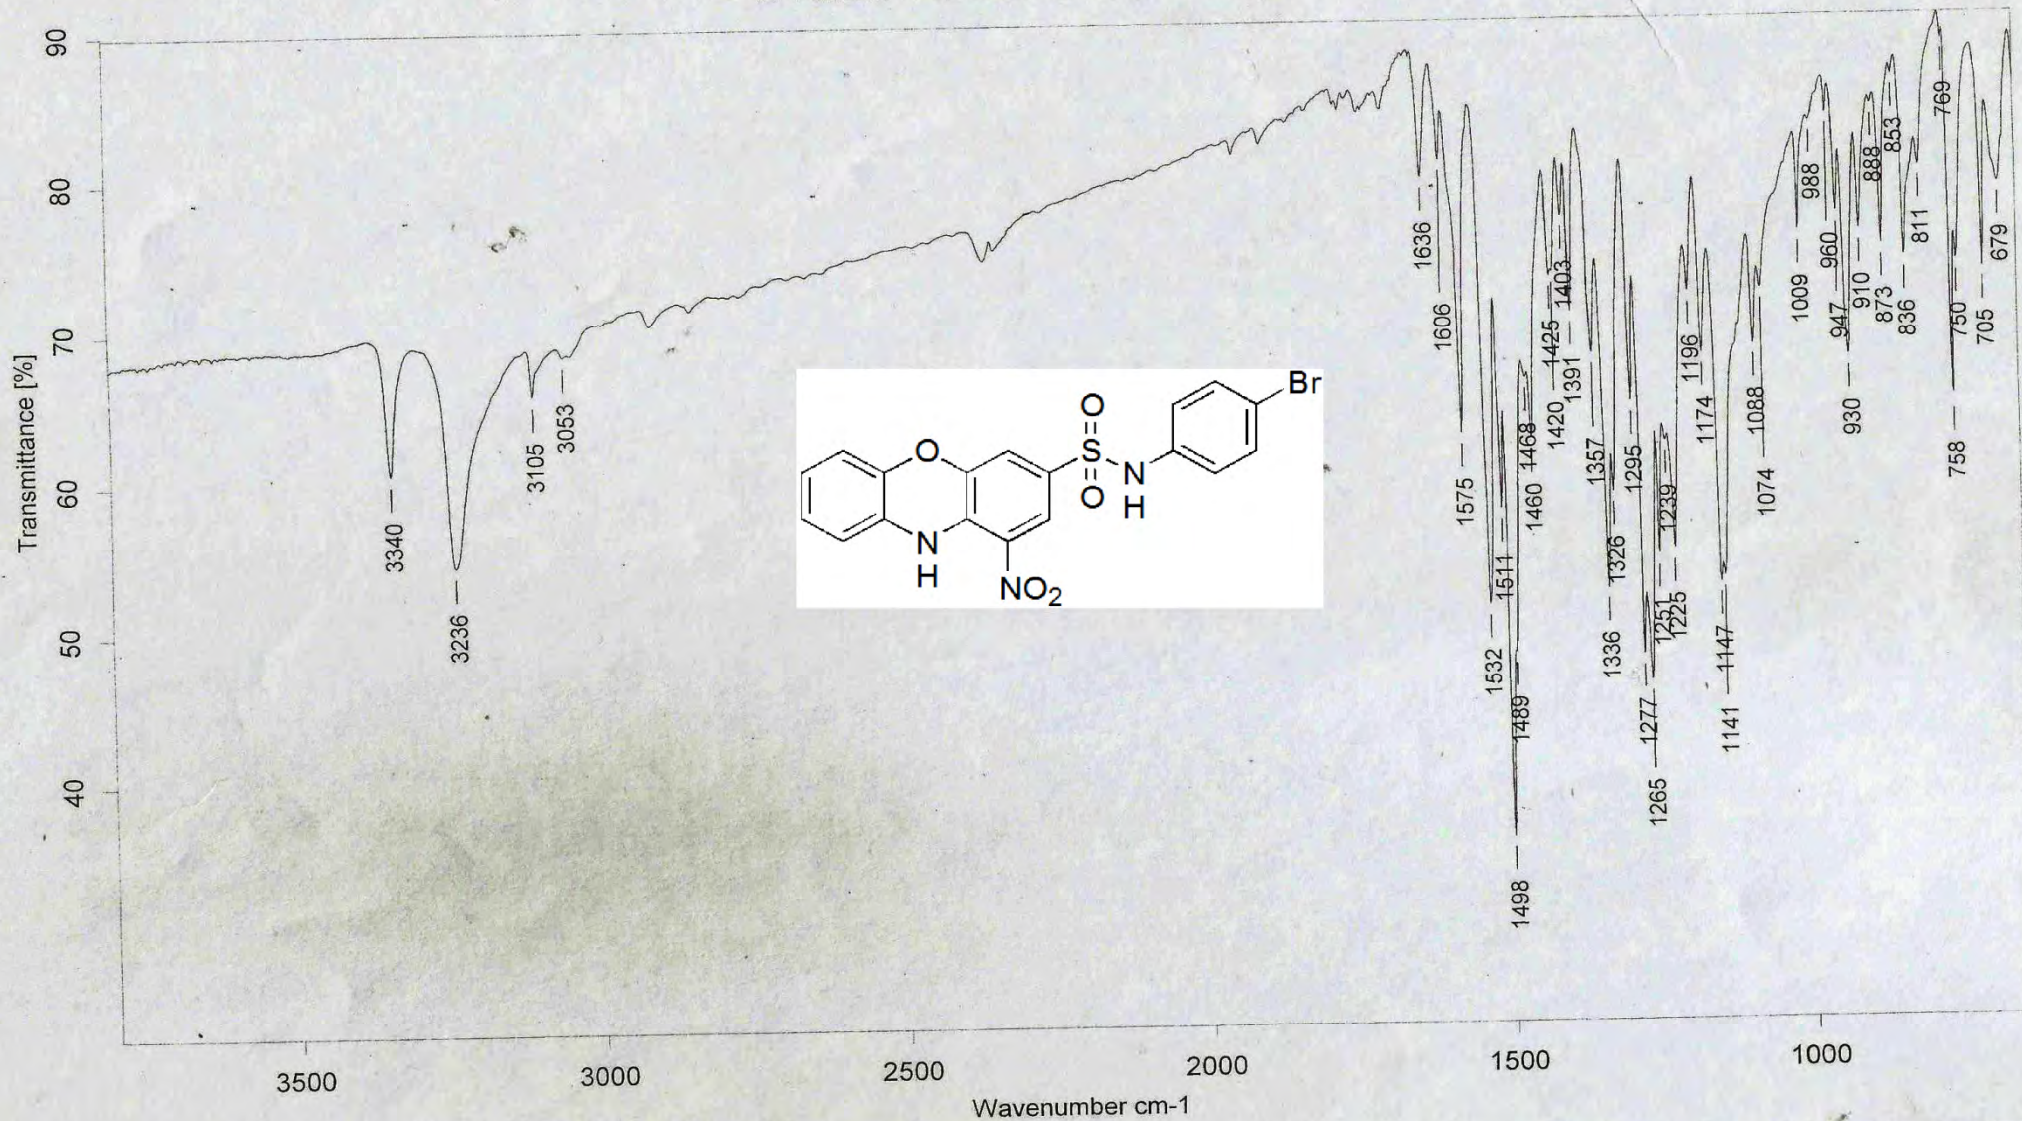

|                                   |                               |                                                    |
|-----------------------------------|-------------------------------|----------------------------------------------------|
| Sample Name: 6 g M.462            | Sample Form: Pellet           | File Name: III21121305.0                           |
| Sample Scans: 16                  | Resolution: 2                 | Experiment: Symed.MIR_TR.XPM                       |
| Date of Measurement: 21/12/2013   | Time of Measurement: 11:19:42 | Path of File: D:\OPUS\DATA-2013\December\III211213 |
| Analysed By: Divyateja 21.12.2013 | Operator Name: Divya Teja     | Checked By: Divya Teja 21/12/2013                  |



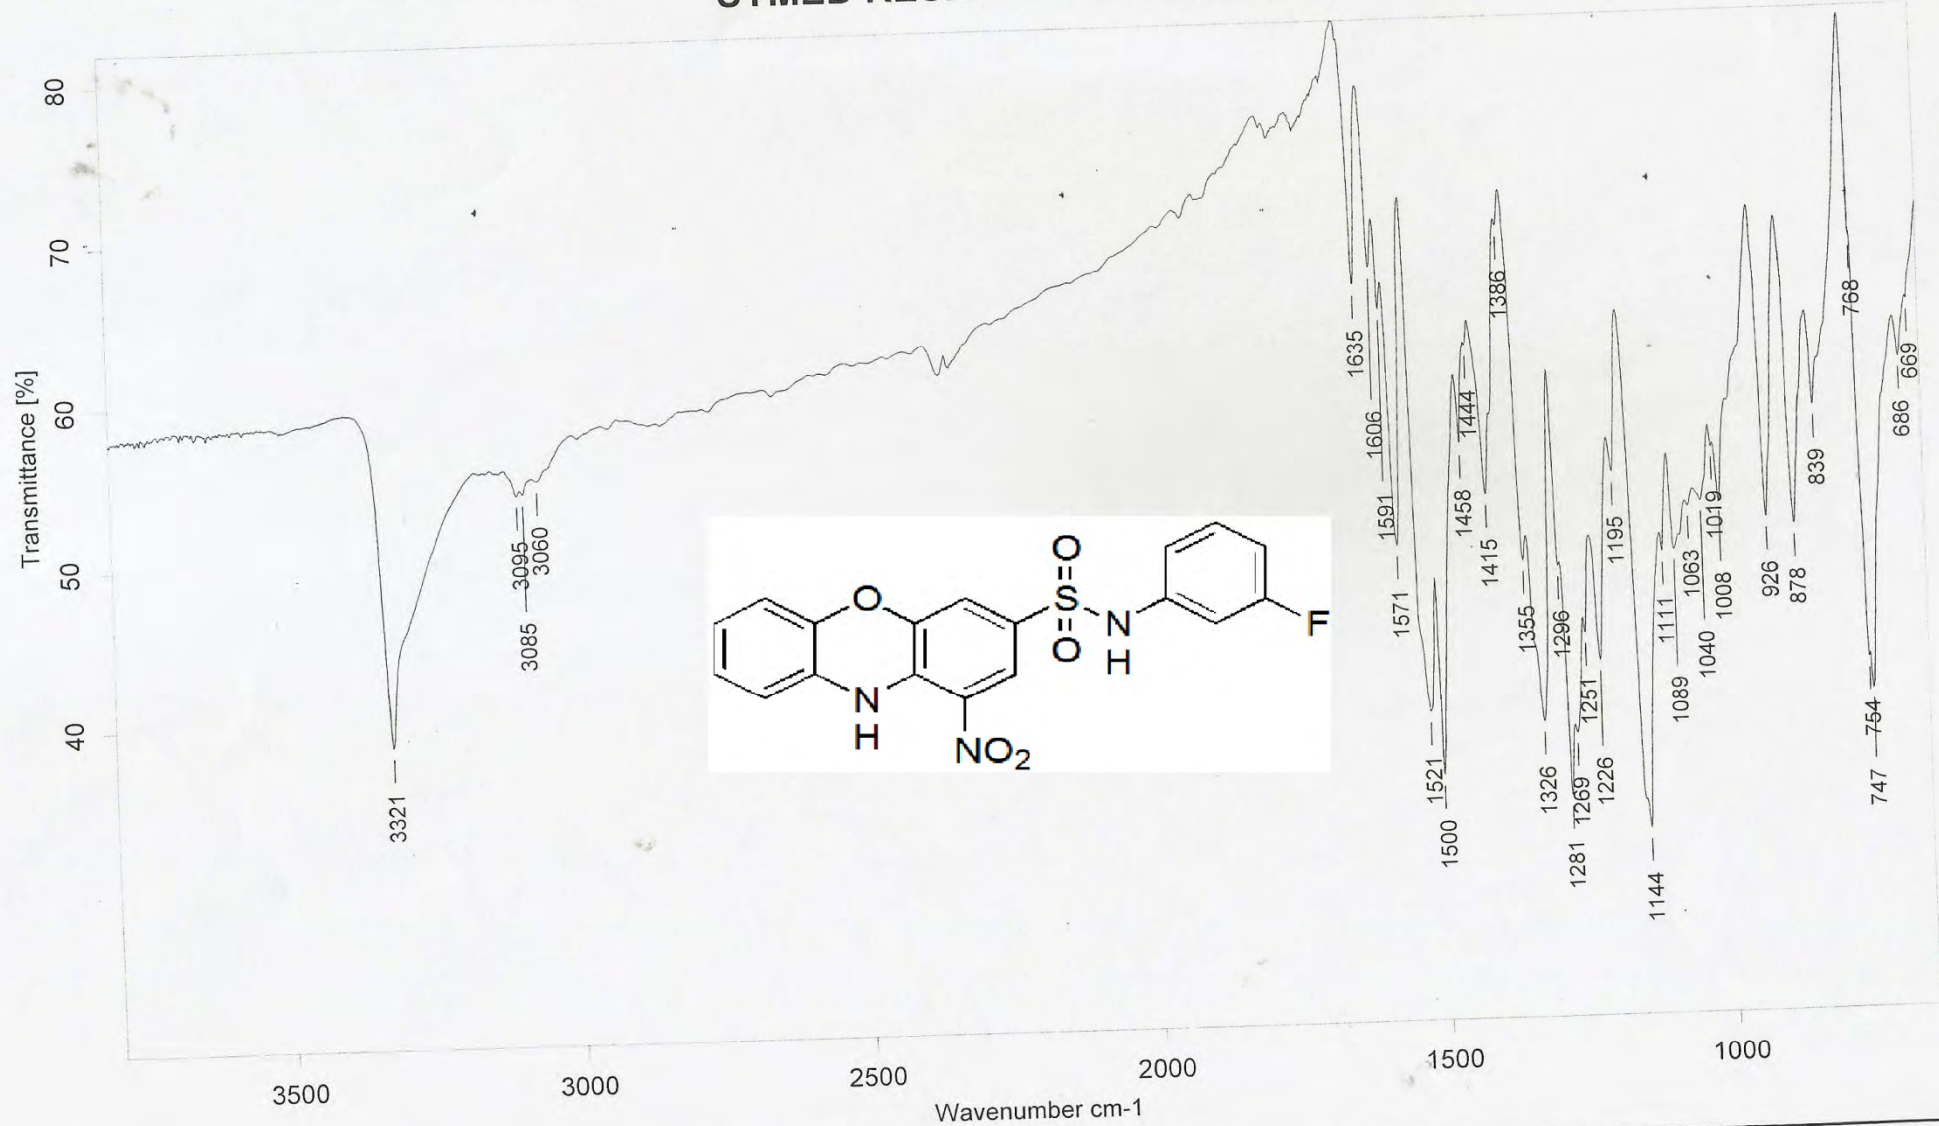

|                                   |                               |                                                    |
|-----------------------------------|-------------------------------|----------------------------------------------------|
| Sample Name: 6 K M.401            | Sample Form: Pellet           | File Name: III21121306.0                           |
| Sample Scans: 16                  | Resolution: 2                 | Experiment: Symed.MIR_TR.XPM                       |
| Date of Measurement: 21/12/2013   | Time of Measurement: 11:24:41 | Path of File: D:\OPUS\DATA-2013\December\III211213 |
| Analysed By: Divyateja 21.12.2013 | Operator Name: Divya Teja     | Checked By: <i>[Signature]</i> 21/12/2013          |

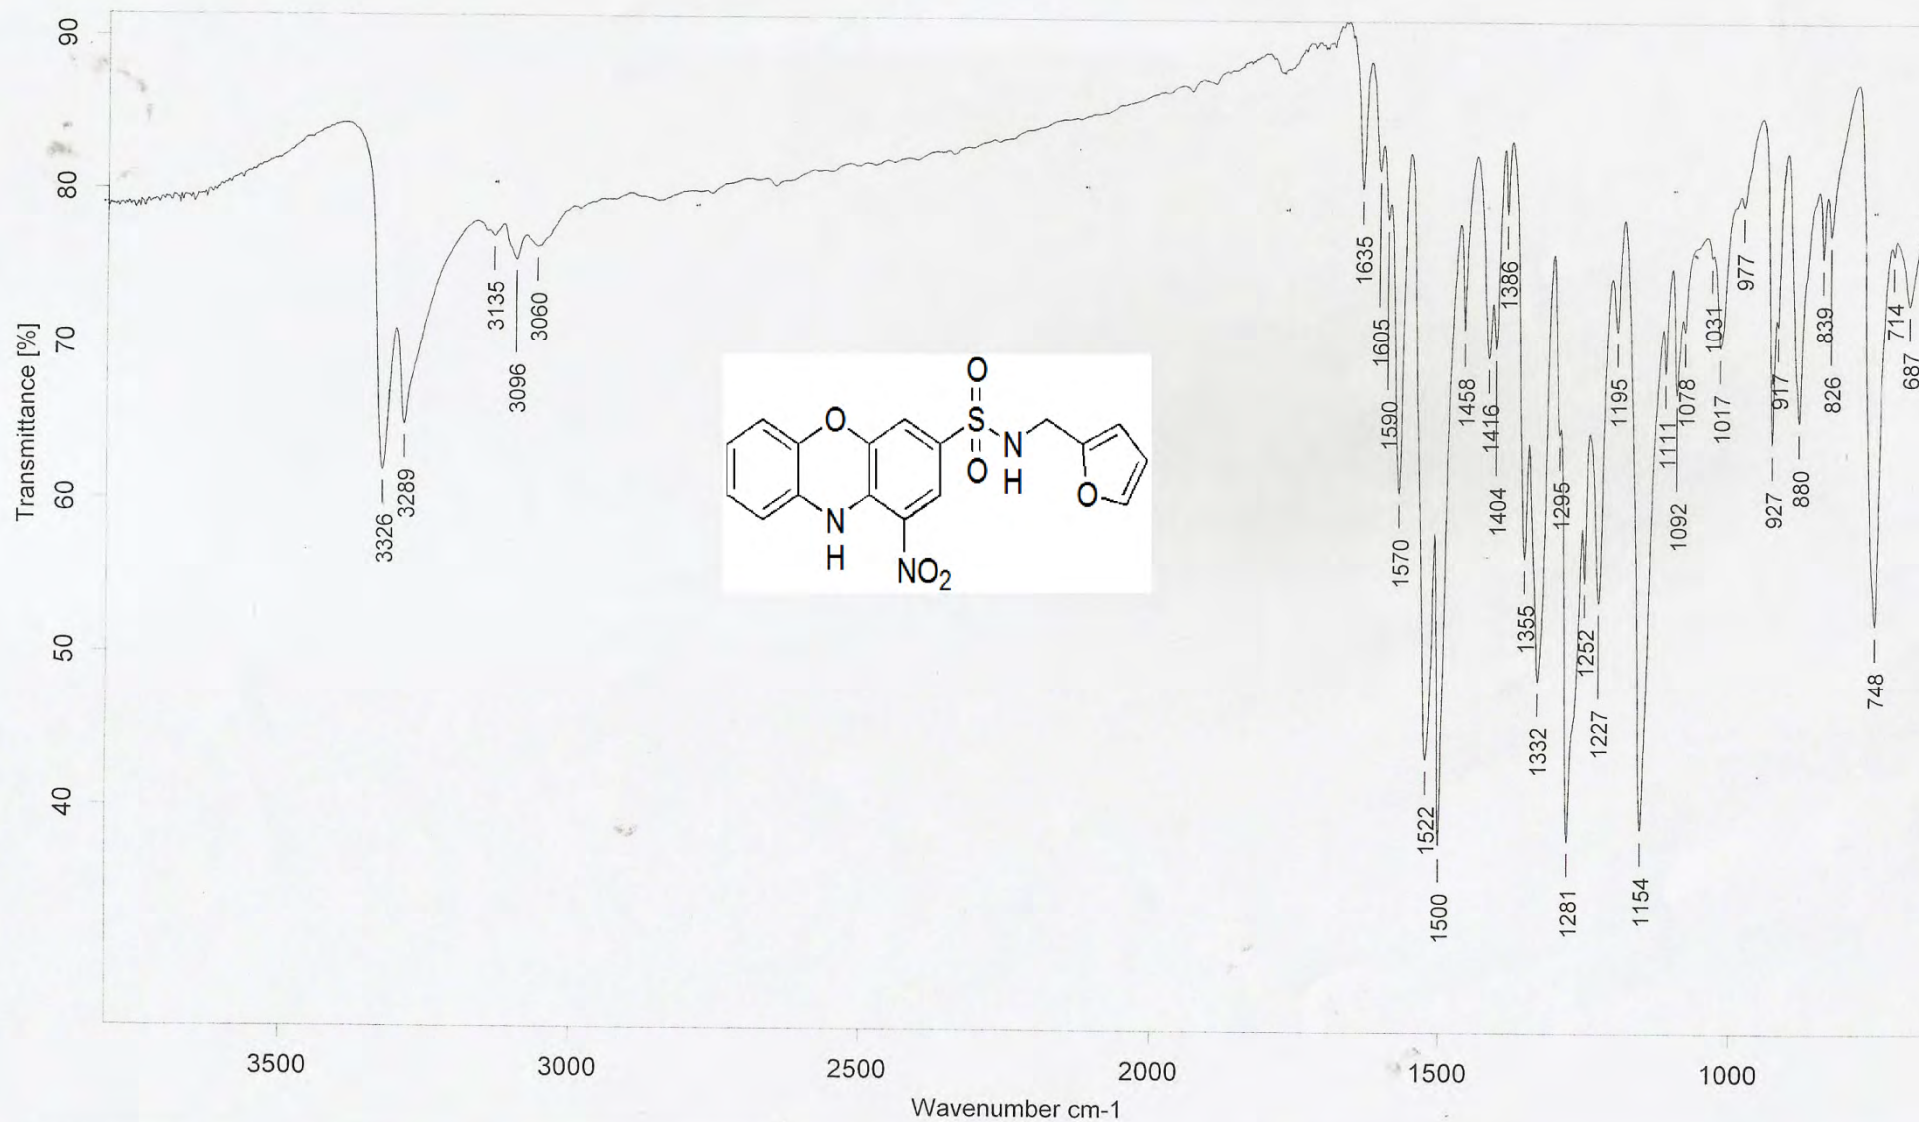

|                                   |                               |                                                    |
|-----------------------------------|-------------------------------|----------------------------------------------------|
| Sample Name: 61387                | Sample Form: Pellet           | File Name: III21121310.0                           |
| Sample Scans: 16                  | Resolution: 2                 | Experiment: Symed.MIR_TR.XPM                       |
| Date of Measurement: 21/12/2013   | Time of Measurement: 13:29:14 | Path of File: D:\OPUS\DATA-2013\December\III211213 |
| Analysed By: Divyateja 21.12.2013 | Operator Name: Divya Teja     | Checked By: Divya Teja 21/12/2013                  |



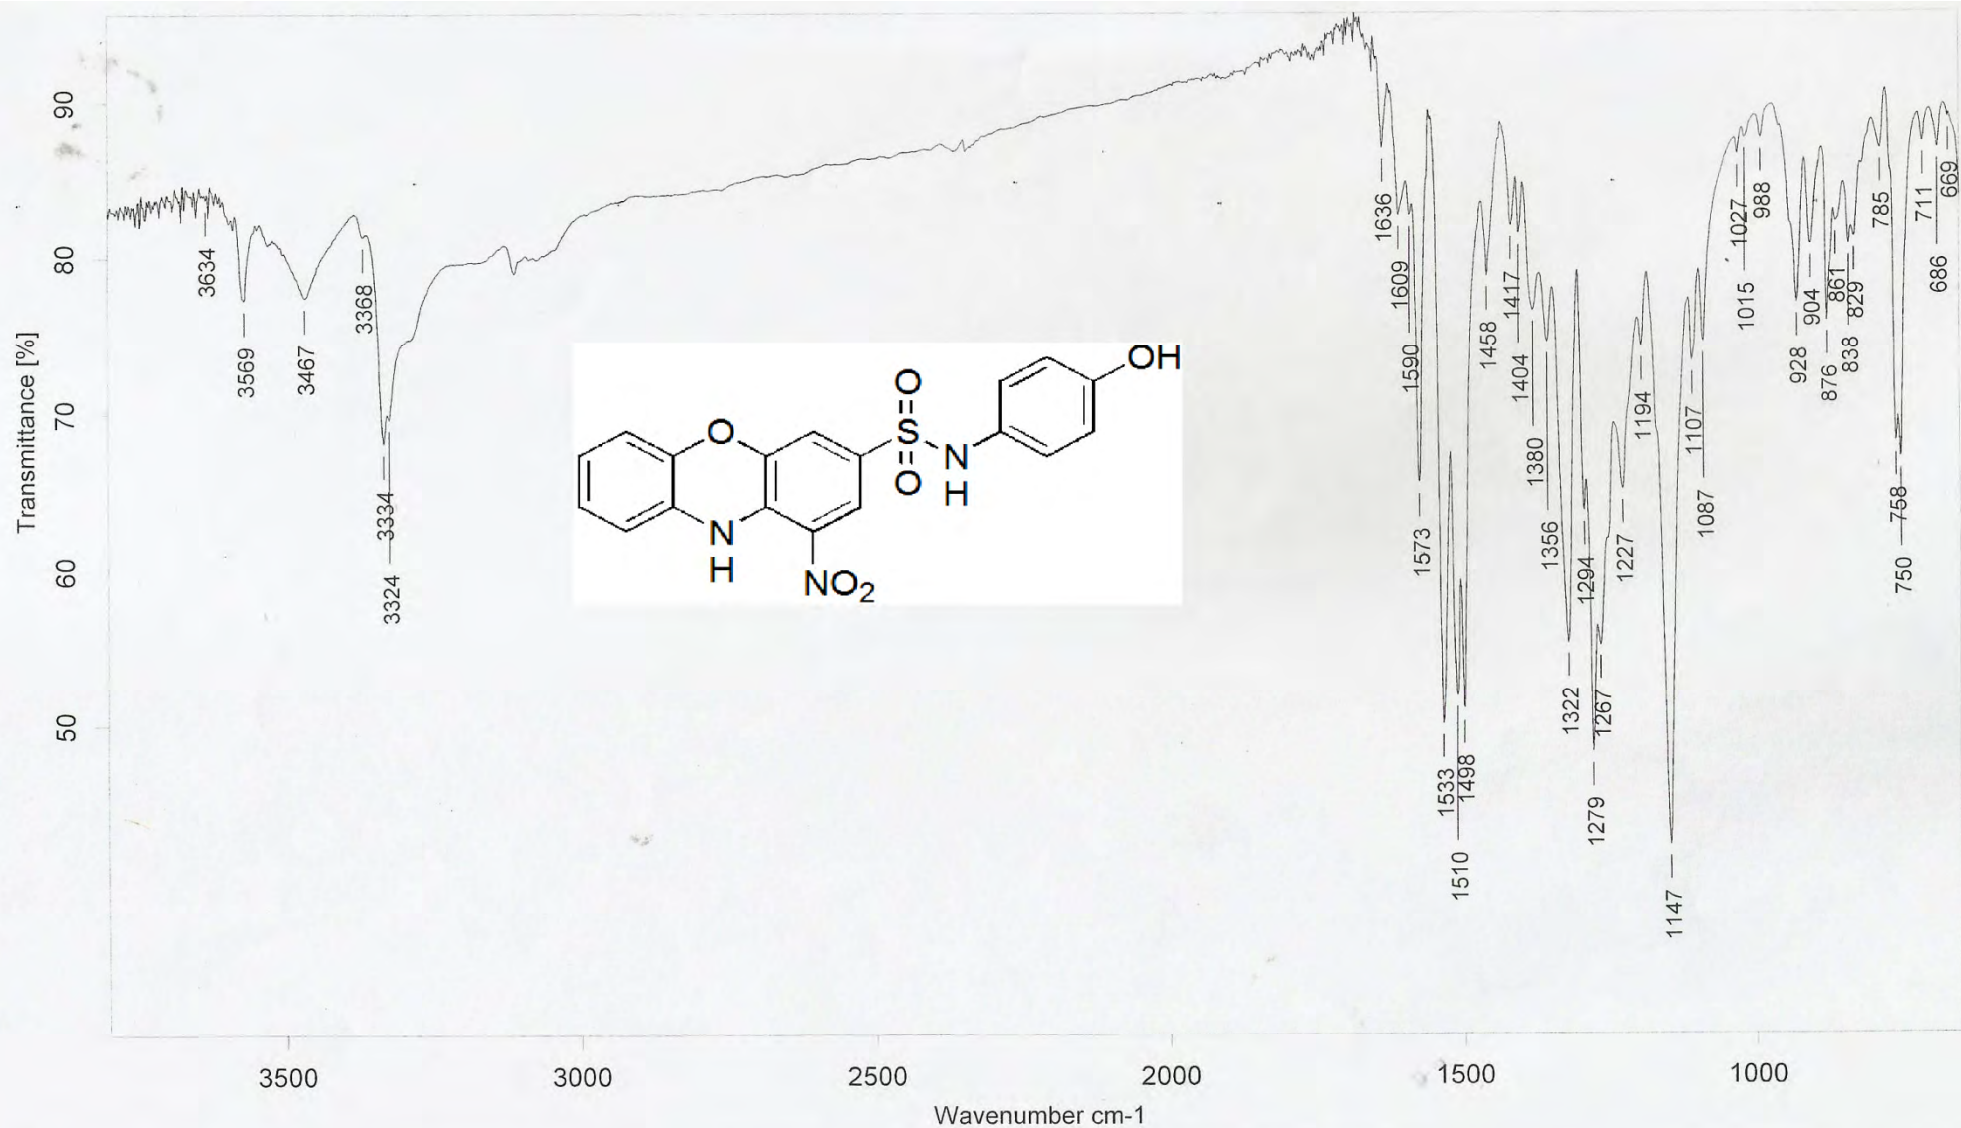

|                                   |                               |                                                    |
|-----------------------------------|-------------------------------|----------------------------------------------------|
| Sample Name: 6 m 399              | Sample Form: Pellet           | File Name: III21121312.0                           |
| Sample Scans: 16                  | Resolution: 2                 | Experiment: Symed.MIR_TR.XPM                       |
| Date of Measurement: 21/12/2013   | Time of Measurement: 13:53:36 | Path of File: D:\OPUS\DATA-2013\December\III211213 |
| Analysed By: Divyateja 21.12.2013 | Operator Name: Divya Teja     | Checked By: Divya Teja 21/12/2013                  |

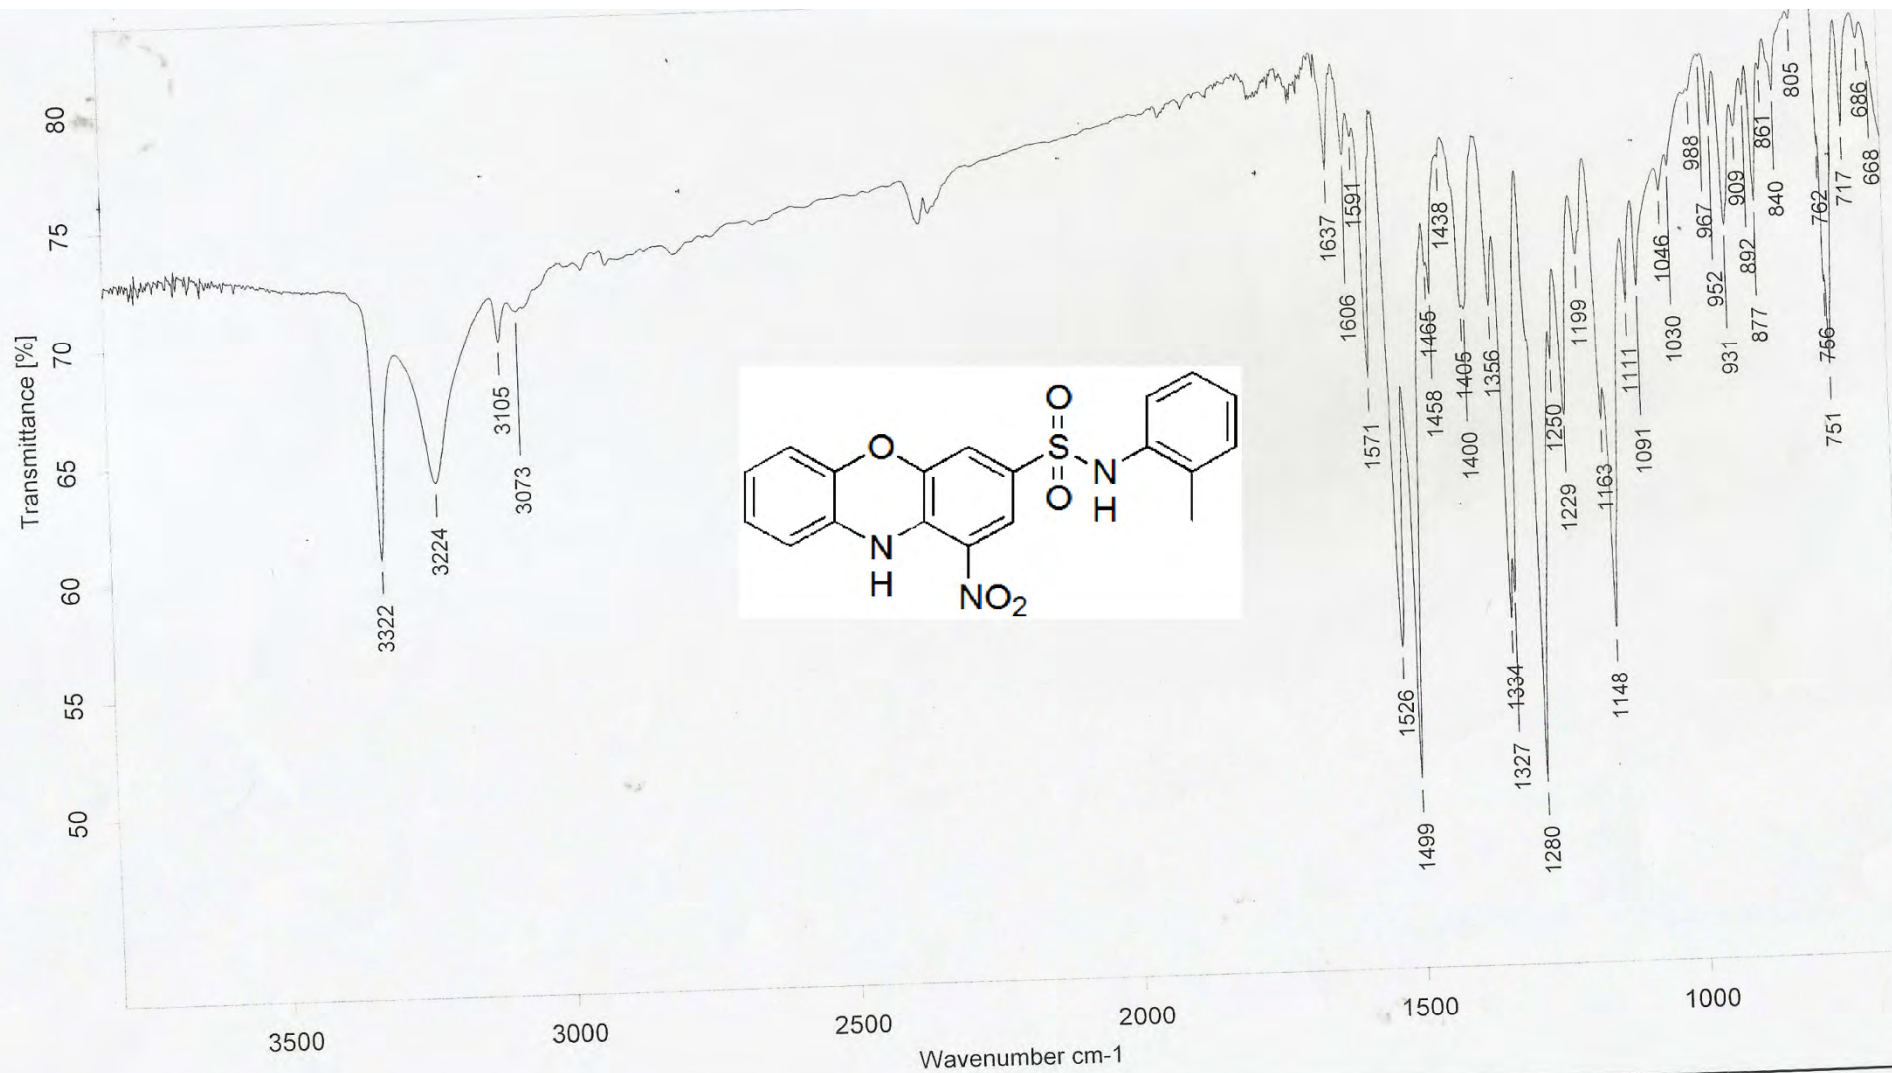

|                                   |                               |                                                    |
|-----------------------------------|-------------------------------|----------------------------------------------------|
| Sample Name: 60 397               | Sample Form: Pellet           | File Name: III21121304.0                           |
| Sample Scans: 16                  | Resolution: 2                 | Experiment: Symed.MIR_TR.XPM                       |
| Date of Measurement: 21/12/2013   | Time of Measurement: 11:13:40 | Path of File: D:\OPUS\DATA-2013\December\III211213 |
| Analysed By: Divyateja 21.12.2013 | Operator Name: Divya Teja     | Checked By: Divan 21/12/2013                       |



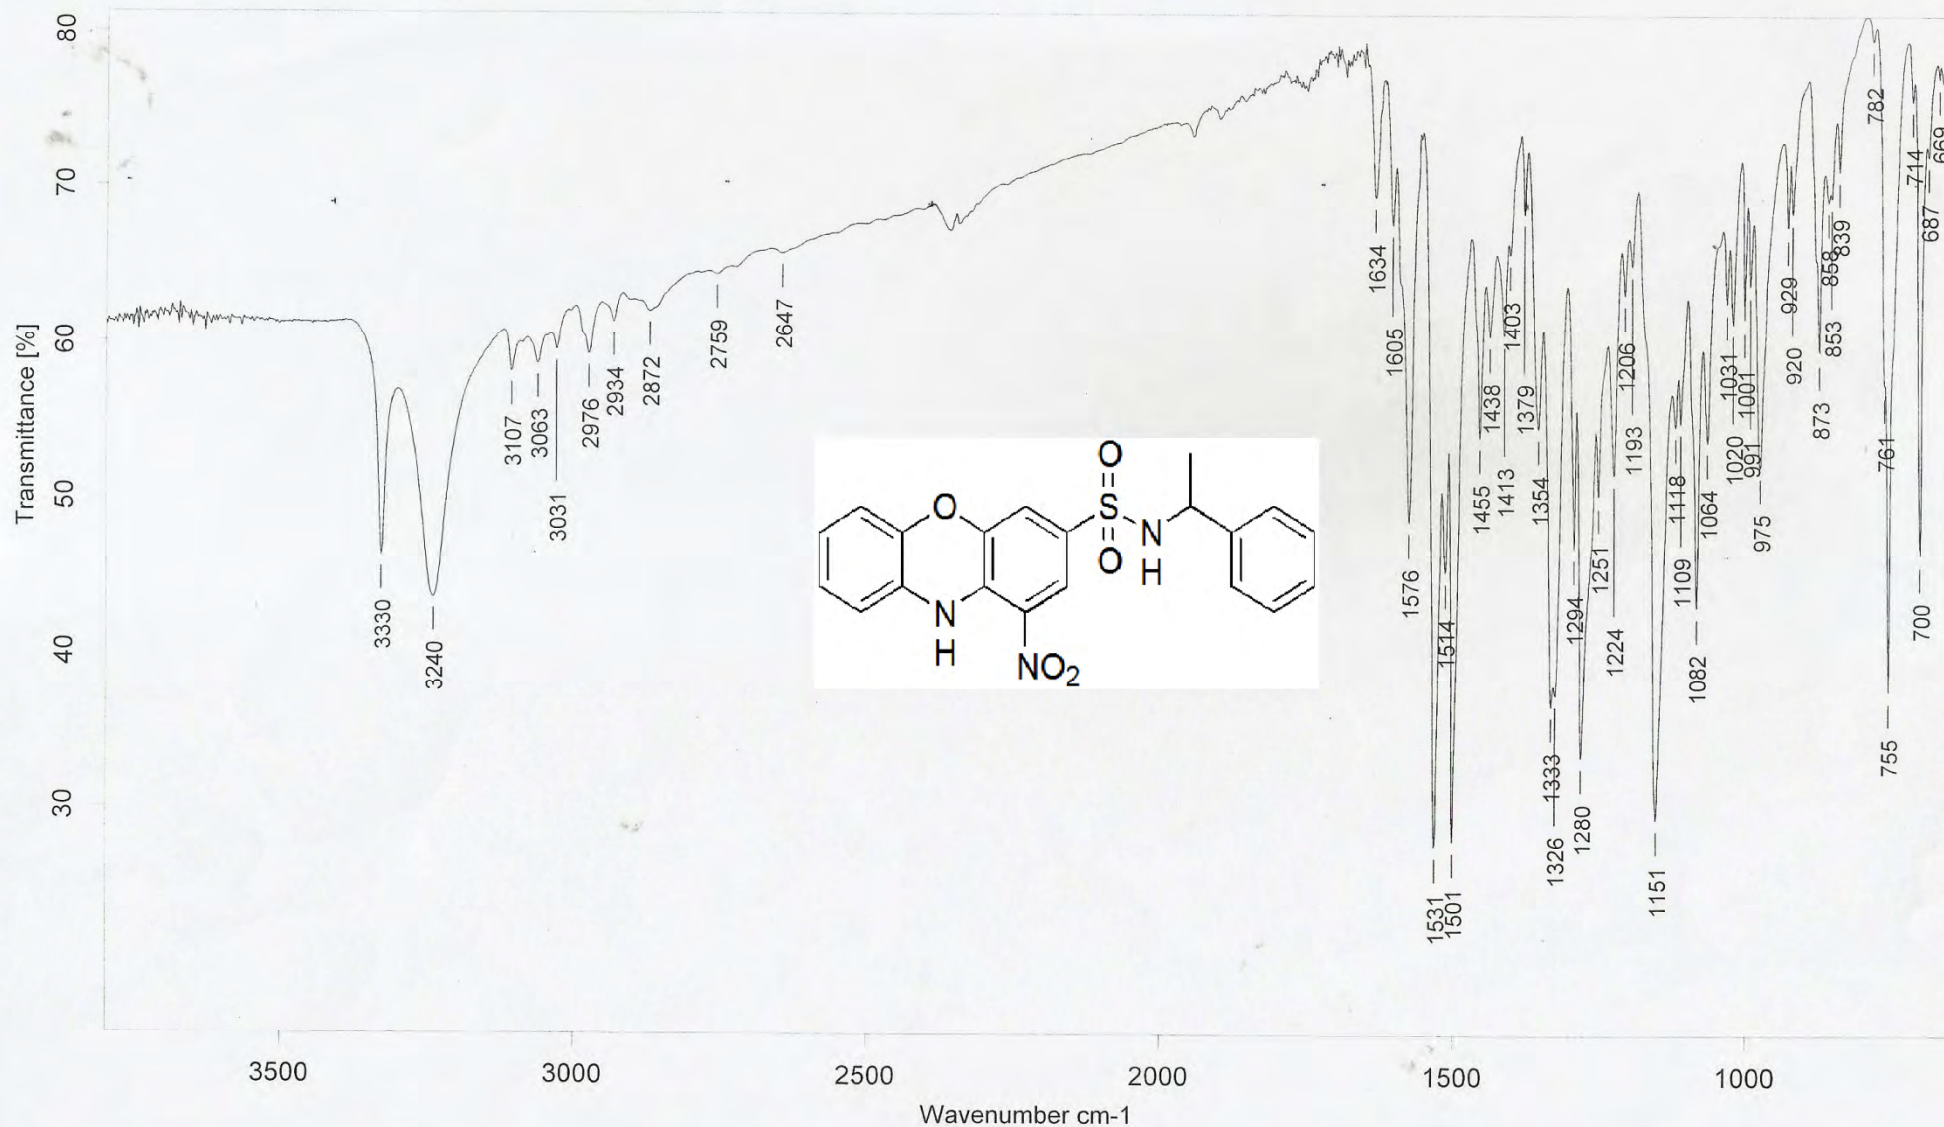

|                                   |                               |                                                    |
|-----------------------------------|-------------------------------|----------------------------------------------------|
| Sample Name: 6 q 411              | Sample Form: Pellet           | File Name: III21121308.0                           |
| Sample Scans: 16                  | Resolution: 2                 | Experiment: Symed.MIR_TR.XPM                       |
| Date of Measurement: 21/12/2013   | Time of Measurement: 13:22:05 | Path of File: D:\OPUS\DATA-2013\December\III211213 |
| Analysed By: Divyateja 21.12.2013 | Operator Name: Divya Teja     | Checked By: Divya Teja 21/12/2013                  |



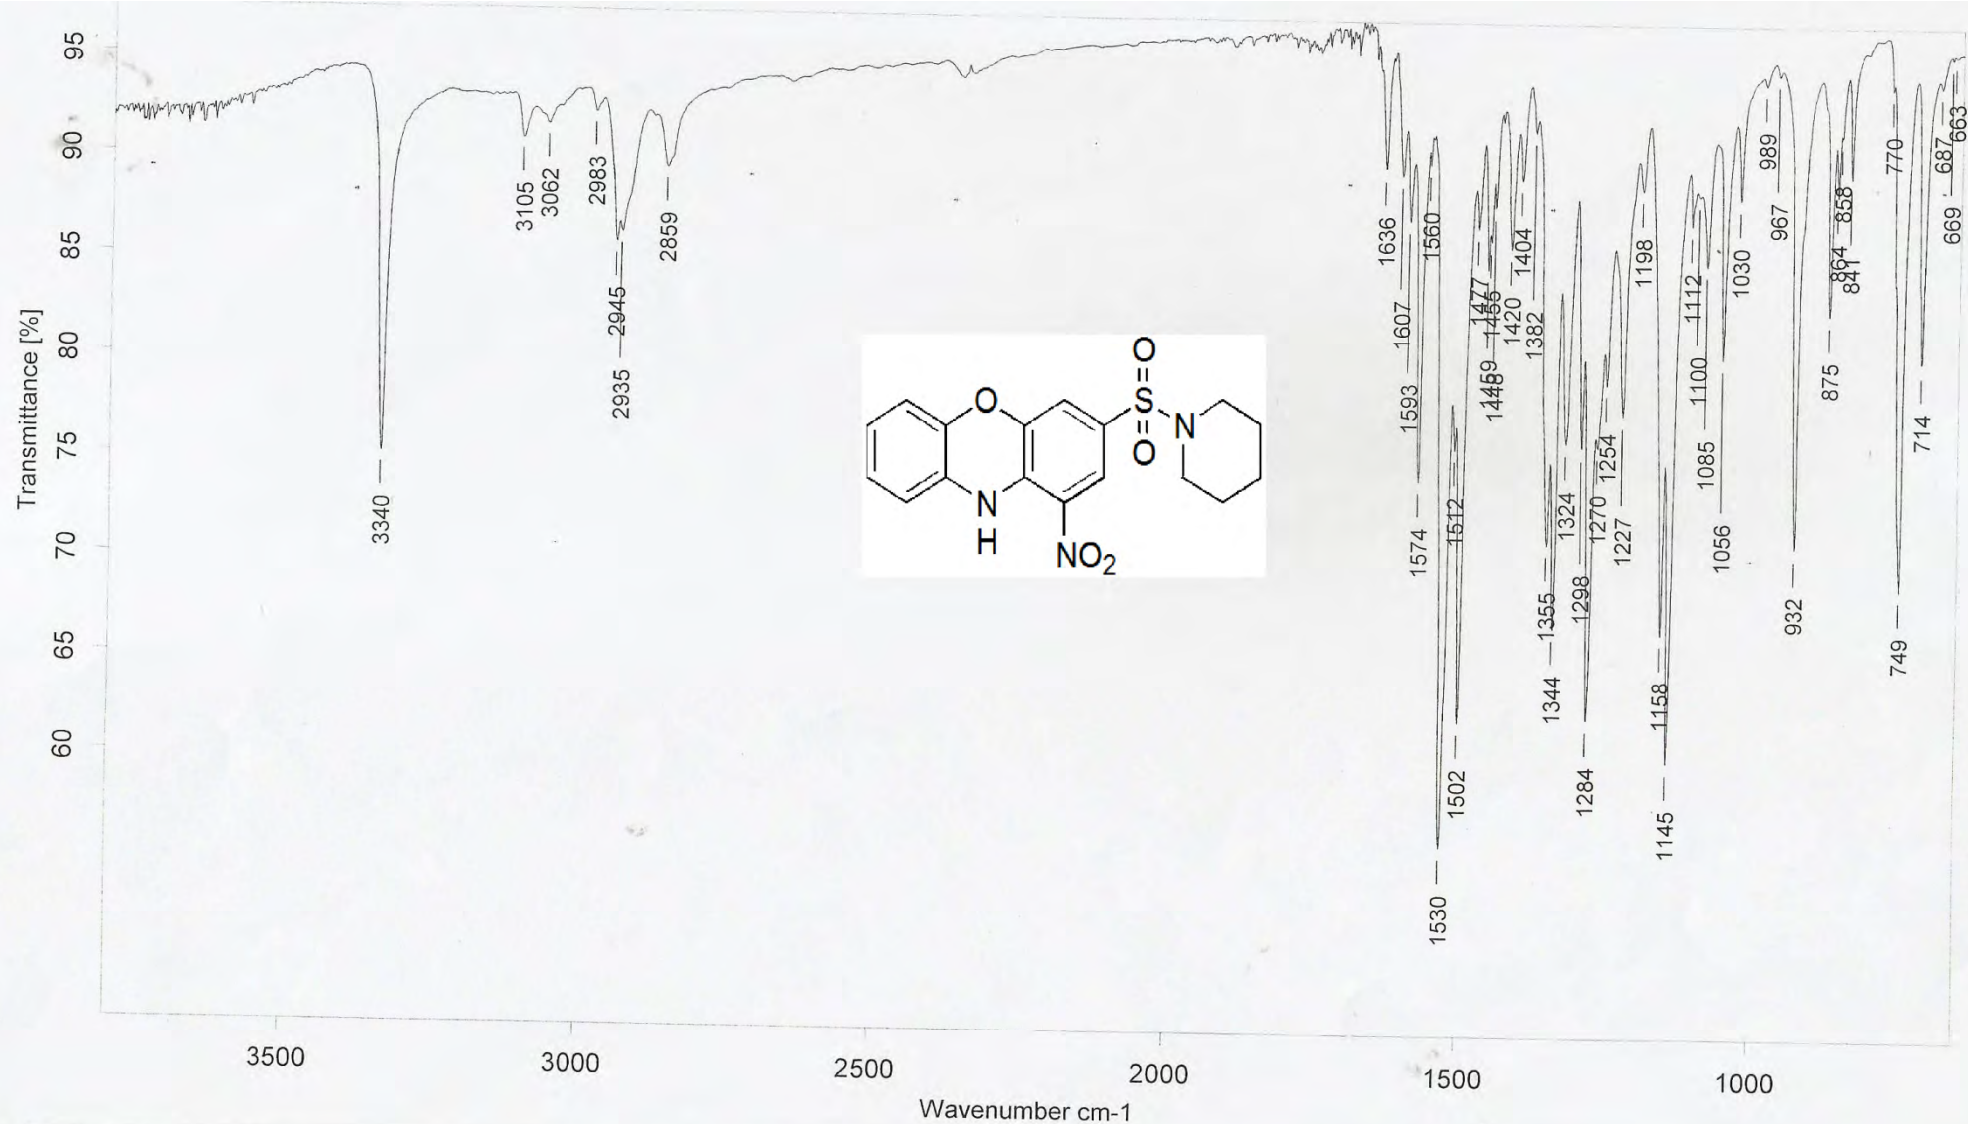

|                                   |                               |                                                    |
|-----------------------------------|-------------------------------|----------------------------------------------------|
| Sample Name: 6 R 375              | Sample Form: Pellet           | File Name: III21121313.0                           |
| Sample Scans: 16                  | Resolution: 2                 | Experiment: Symed.MIR_TR.XPM                       |
| Date of Measurement: 21/12/2013   | Time of Measurement: 13:56:51 | Path of File: D:\OPUS\DATA-2013\December\III211213 |
| Analysed By: Divyateja 21.12.2013 | Operator Name: Divya Teja     | Checked By: Divya 21/12/2013                       |

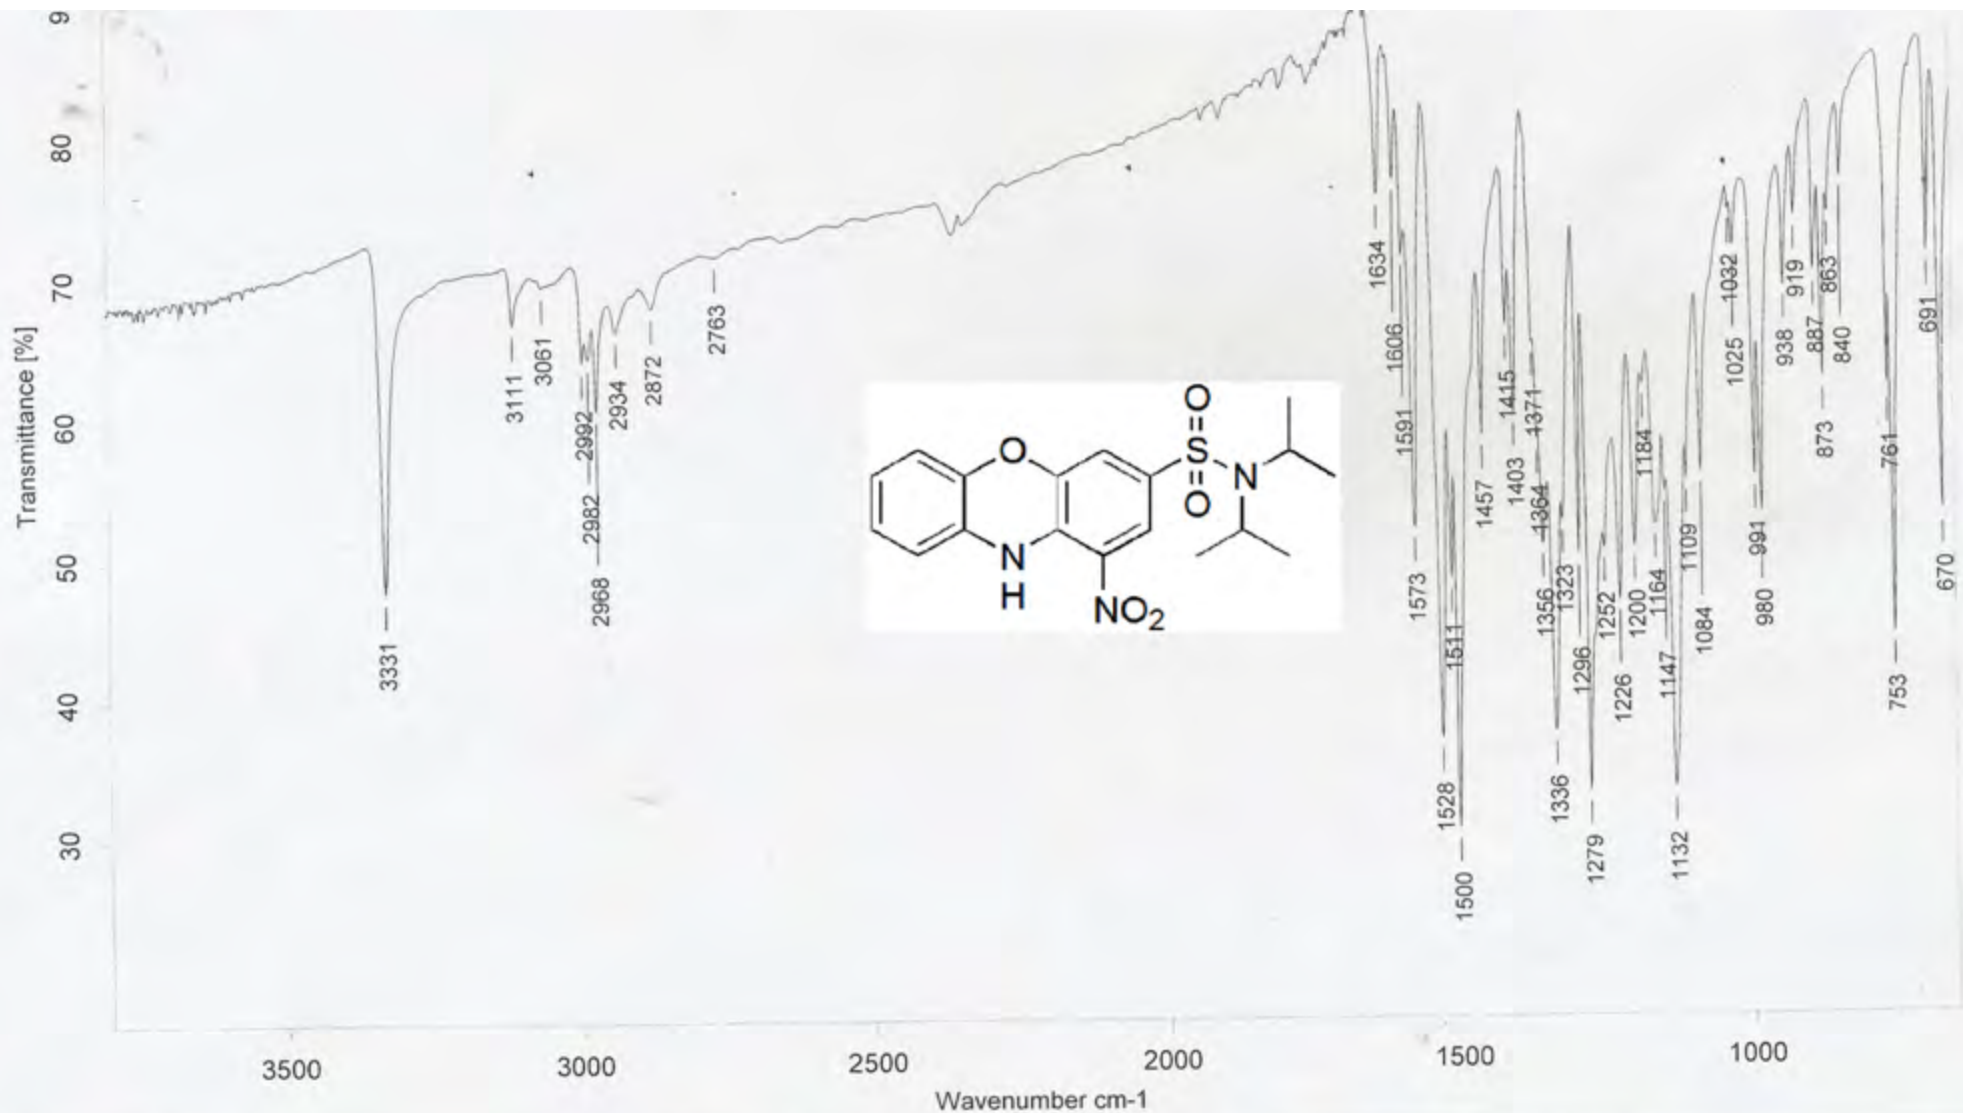

|                                   |                               |                                                    |
|-----------------------------------|-------------------------------|----------------------------------------------------|
| Sample Name: 6 S.                 | Sample Form: Pellet           | File Name: III21121317.0                           |
| Sample Scans: 16                  | Resolution: 2                 | Experiment: Symed.MIR_TR.XPM                       |
| Date of Measurement: 21/12/2013   | Time of Measurement: 14:28:26 | Path of File: D:\OPUS\DATA-2013\December\III211213 |
| Analysed By: Divyateja 21.12.2013 | Operator Name: Divya Teja     | Checked By: Divya Teja 21/12/2013                  |



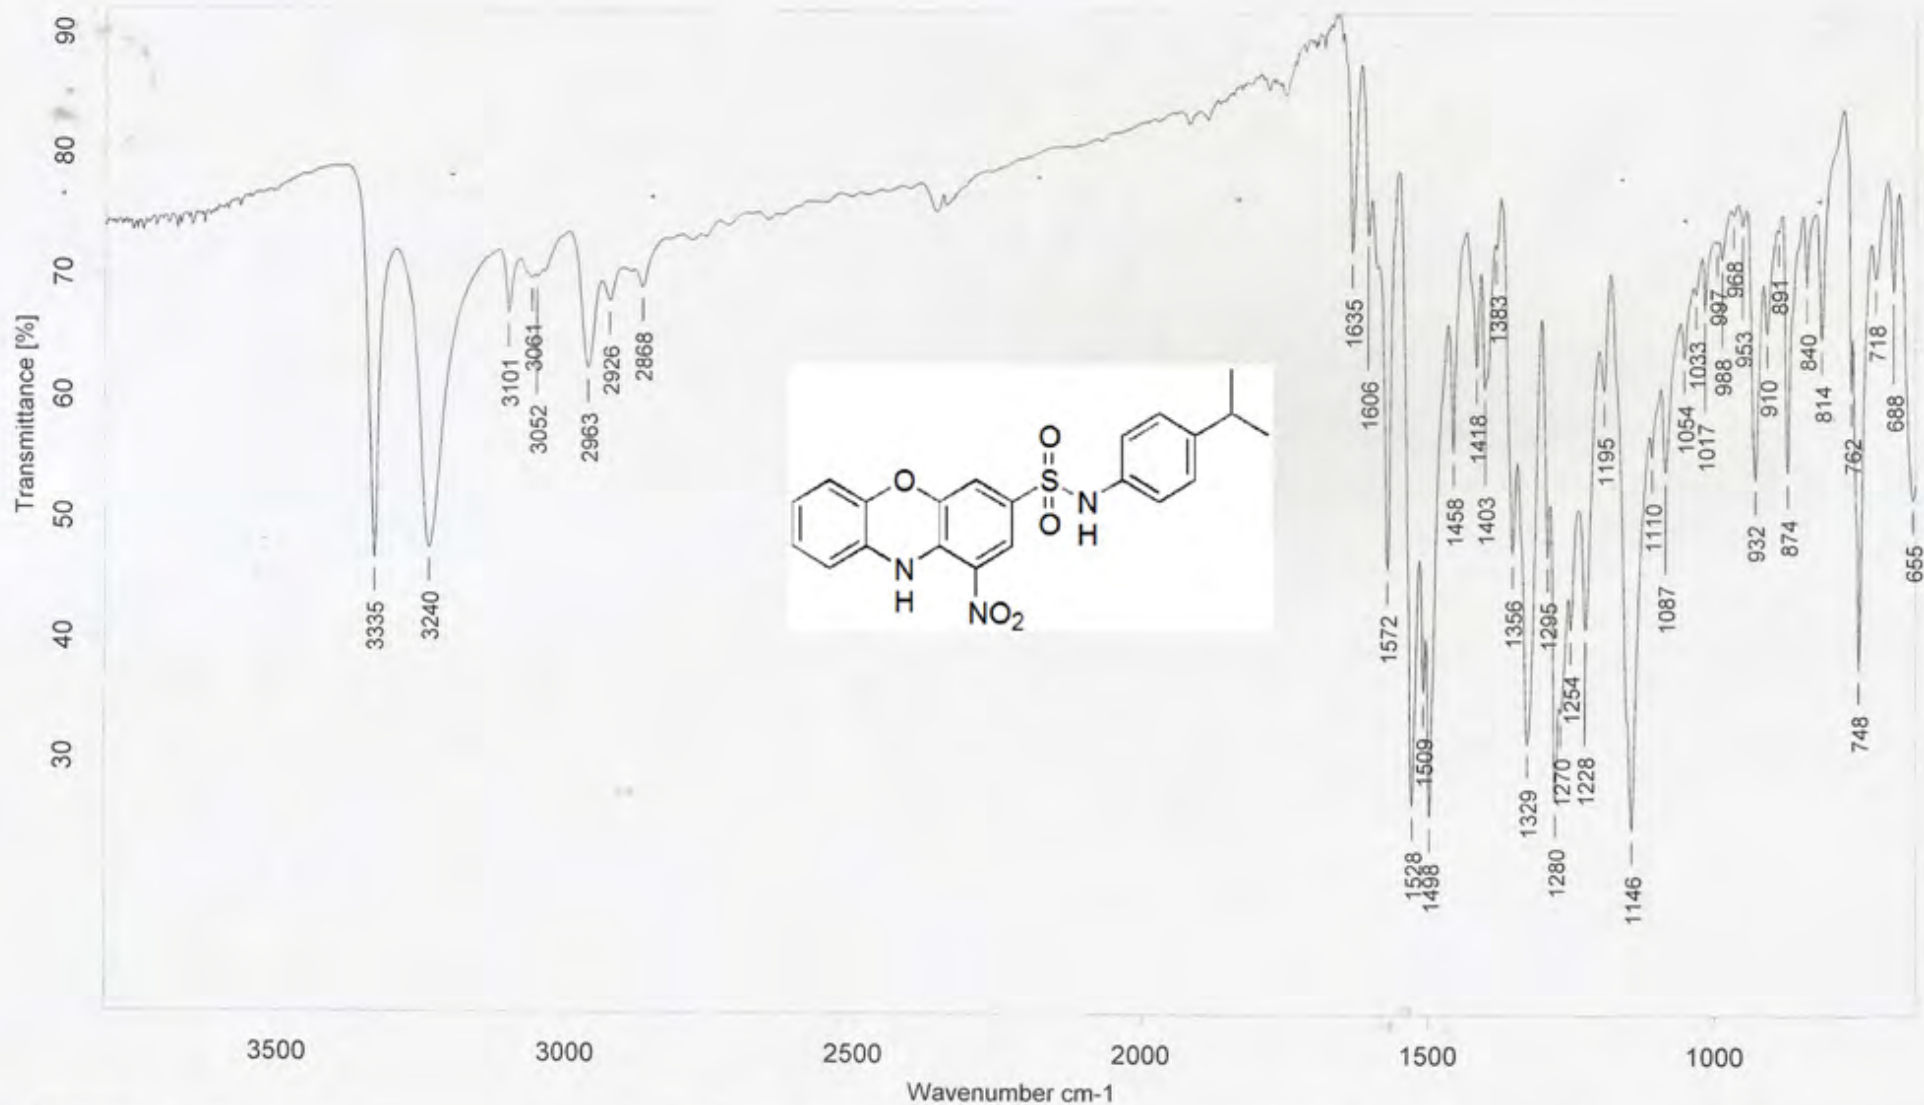

|                                   |                               |                                                    |
|-----------------------------------|-------------------------------|----------------------------------------------------|
| Sample Name: 6 t                  | Sample Form: Pellet           | File Name: III21121315.0                           |
| Sample Scans: 16                  | Resolution: 2                 | Experiment: Symed.MIR_TR.XPM                       |
| Date of Measurement: 21/12/2013   | Time of Measurement: 14:04:44 | Path of File: D:\OPUS\DATA-2013\December\III211213 |
| Analysed By: Divyateja 21.12.2013 | Operator Name: Divya Teja     | Checked By: Divya Teja 21/12/2013                  |

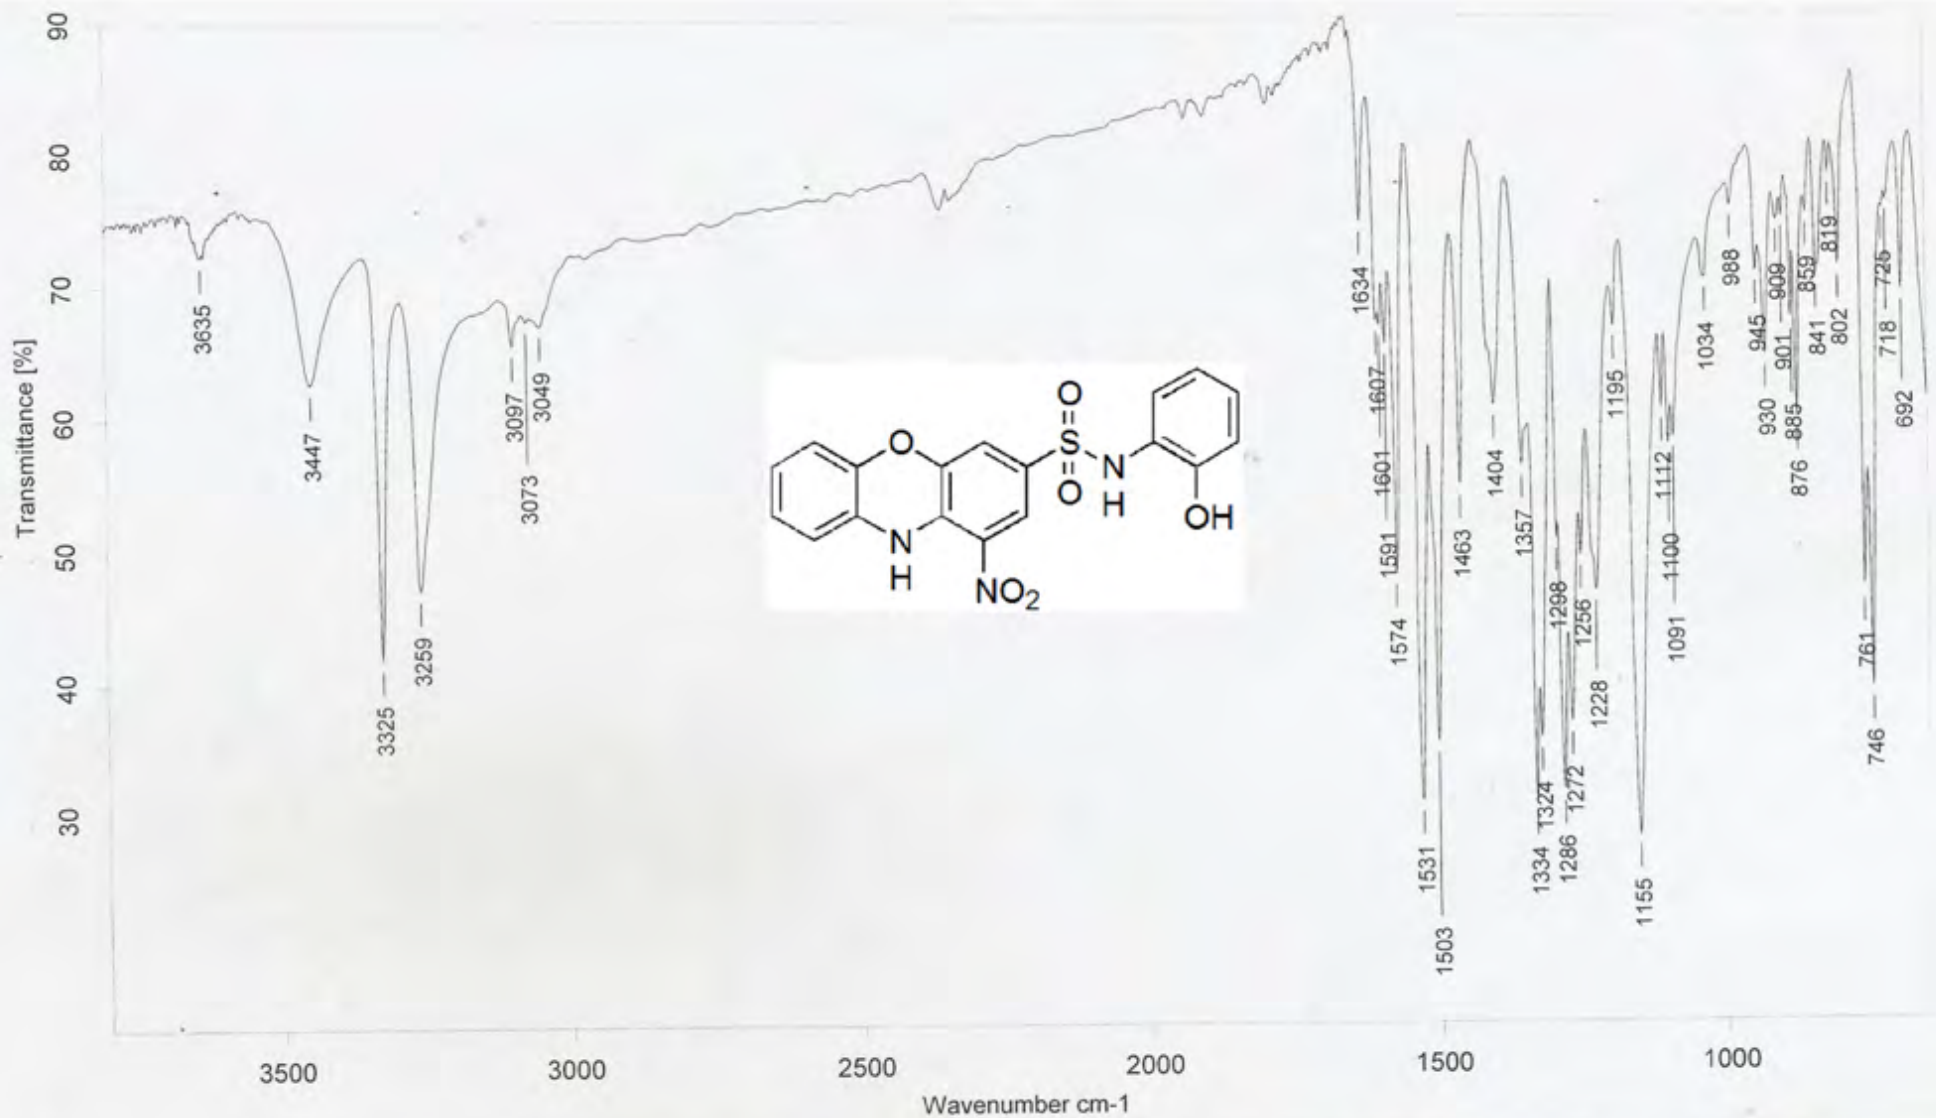

|                                   |                               |                                                    |
|-----------------------------------|-------------------------------|----------------------------------------------------|
| Sample Name: 6 u                  | Sample Form: Pellet           | File Name: III21121316.0                           |
| Sample Scans: 16                  | Resolution: 2                 | Experiment: Symed.MIR_TR.XPM                       |
| Date of Measurement: 21/12/2013   | Time of Measurement: 14:22:18 | Path of File: D:\OPUS\DATA-2013\December\III211213 |
| Analysed By: Divyateja 21.12.2013 | Operator Name: Divya Teja     | Checked By: Divya Teja 21/12/2013                  |
