# Supplementary material for: Construction of phenoxazine rings containing nitro and sulfonic acid groups leading to phenoxazine-3-sulfonamide derivatives: their evaluation as novel and potential insulin secretagogues
Source: Royal Society of Chemistry journal article supplement (doi:10.1039/c3md00377a), 2014-01-01
Supplement: c3md00377a3.pdf [file c3md00377a3.pdf]

Data File : D:\CHEMSTATION\DATA-2013\DECEMBER\191213\MASS000022.D

Sample Name : 6 b

Acq. Operator : Jyothi

Acq. Instrument : Instrument 1

Location : Vial 12

Injection Date : 12/19/2013 4:19:23 PM

Inj Volume : 5.000 µl

Acq. Method : C:\CHEM32\1\METHODS\DIP MASS-ESI.M

Last changed : 12/19/2013 3:33:08 PM by Jyothi  
(modified after loading)

Analysis Method : C:\CHEM32\1\METHODS\DIP MASS-ESI.M

Last changed : 12/19/2013 4:12:55 PM by Jyothi  
(modified after loading)

Sample Info :

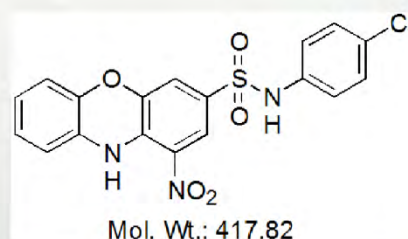

Additional Info : Peak(s) manually integrated

# MS Spectrum

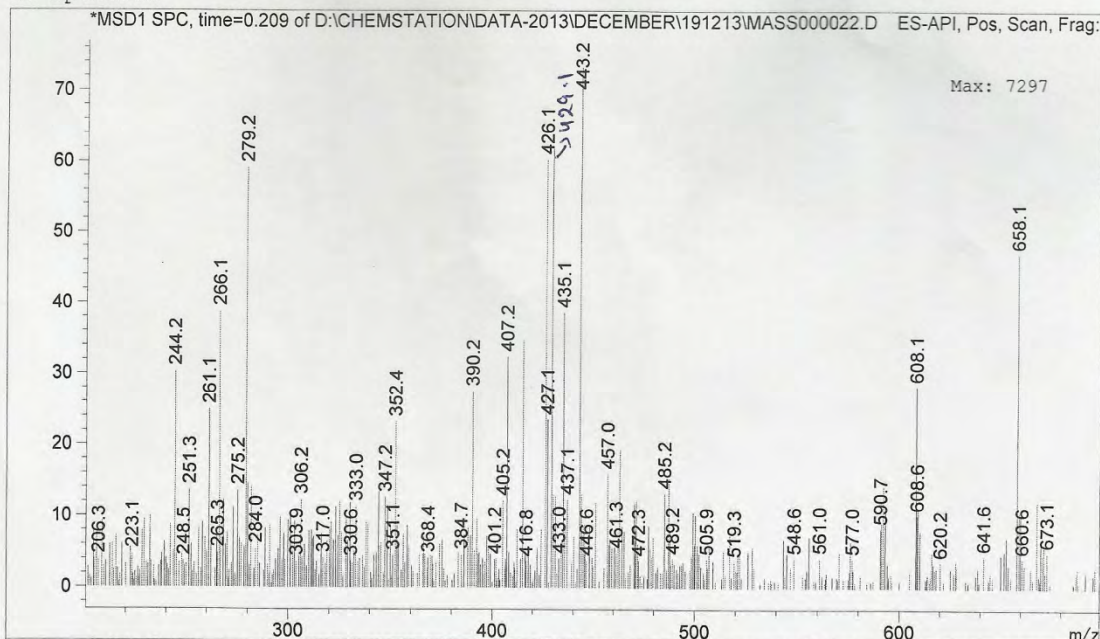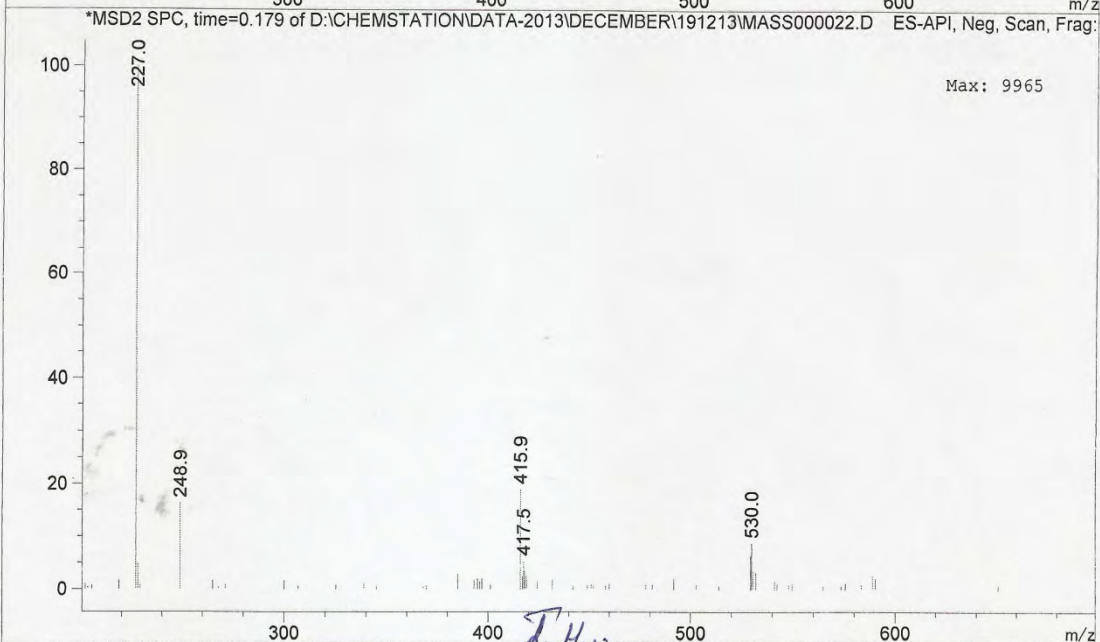

Print of window 80: MS Spectrum

Data File : D:\CHEMSTATION\DATA-2013\DECEMBER\191213\MASS000025.D

Sample Name : 6 e

Acq. Operator : Jyothi

Acq. Instrument : Instrument 1

Location : Vial 15

Injection Date : 12/19/2013 4:24:00 PM

Inj Volume : 5.000 µl

Acq. Method : C:\CHEM32\1\METHODS\DIP MASS-ESI.M

Last changed : 12/19/2013 3:33:08 PM by Jyothi  
(modified after loading)

Analysis Method : C:\CHEM32\1\METHODS\DIP MASS-ESI.M

Last changed : 12/19/2013 4:12:55 PM by Jyothi  
(modified after loading)

Sample Info :

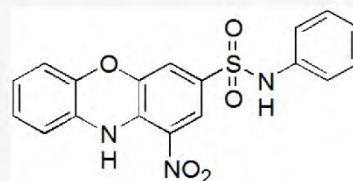

Mol. Wt.: 383.38

Additional Info : Peak(s) manually integrated

MS Spectrum

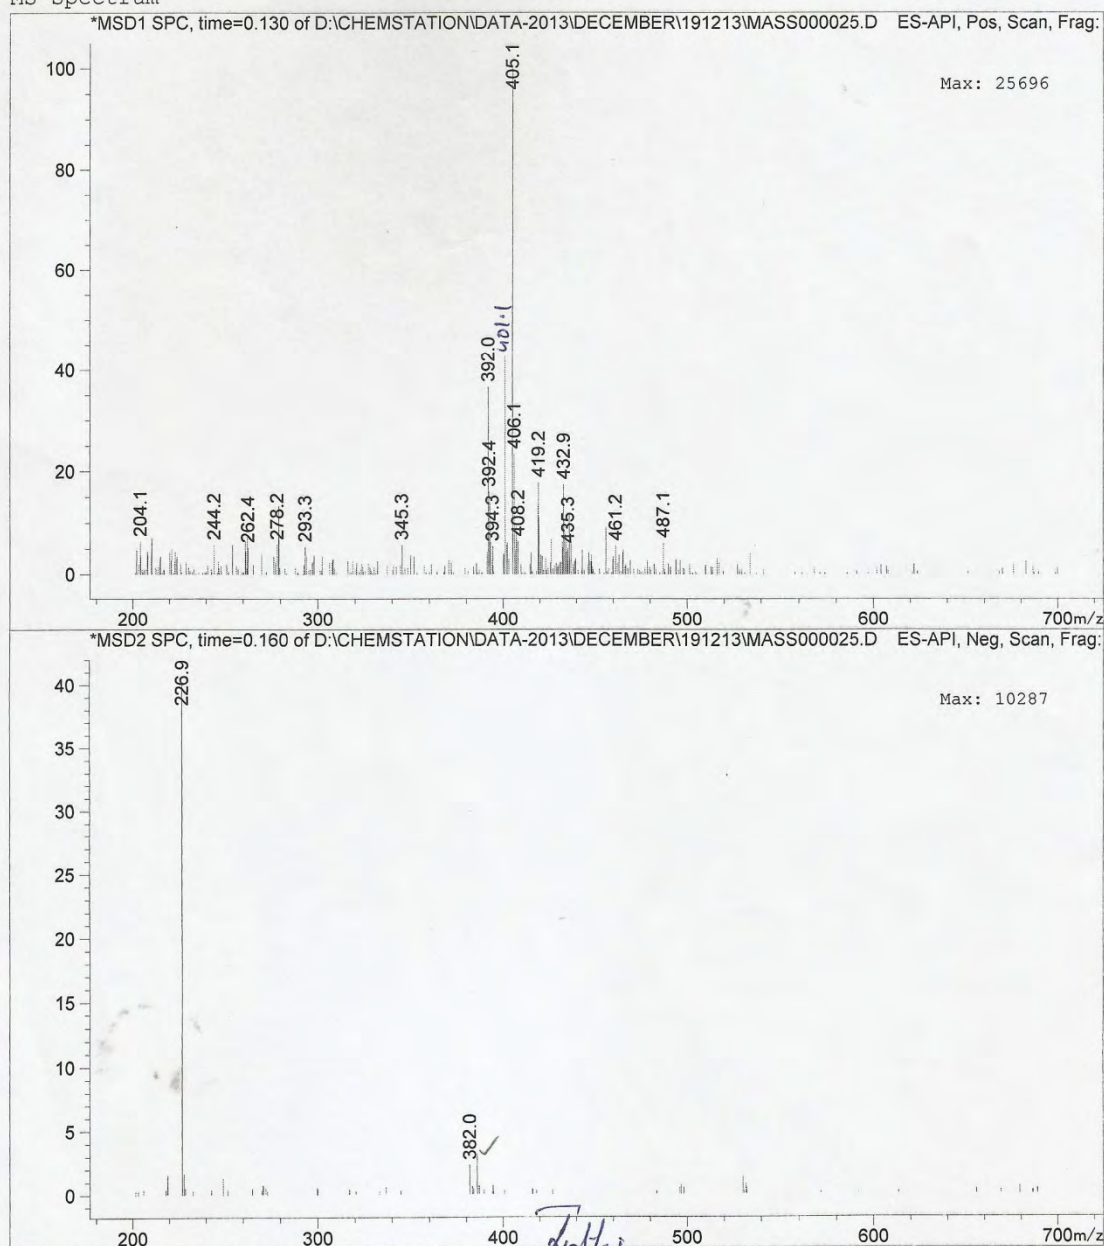

Instrument 1 12/19/2013 4:34:00 PM Jyothi

Page 1 of 1

*Jyothi*  
19/12/13



Print of window 80: MS Spectrum

Data File : D:\CHEMSTATION\DATA-2013\DECEMBER\191213\MASS000016.D

Sample Name : 6 J

=====

Acq. Operator : Jyothi  
Acq. Instrument : Instrument 1 Location : Vial 6  
Injection Date : 12/19/2013 3:58:44 PM Inj Volume : 5.000 µl

Acq. Method : C:\CHEM32\1\METHODS\DIP MASS-ESI.M  
Last changed : 12/19/2013 3:33:08 PM by Jyothi  
(modified after loading)

Analysis Method : C:\CHEM32\1\METHODS\DIP MASS-ESI.M  
Last changed : 12/19/2013 4:12:55 PM by Jyothi  
(modified after loading)

Sample Info :

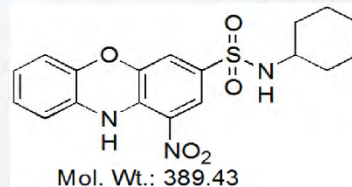

Additional Info : Peak(s) manually integrated

MS Spectrum

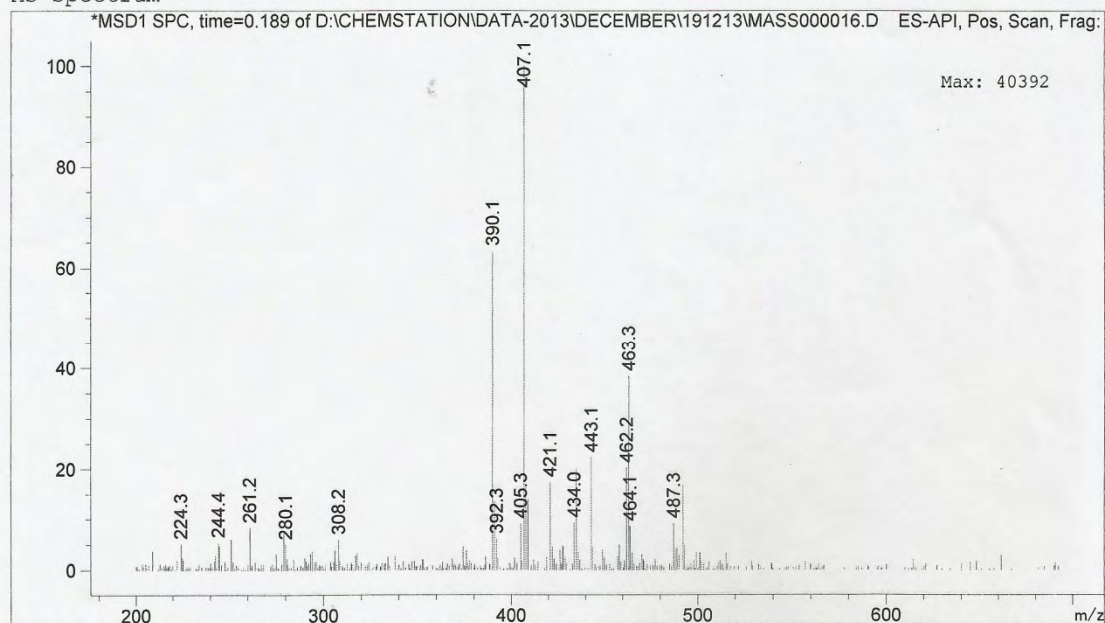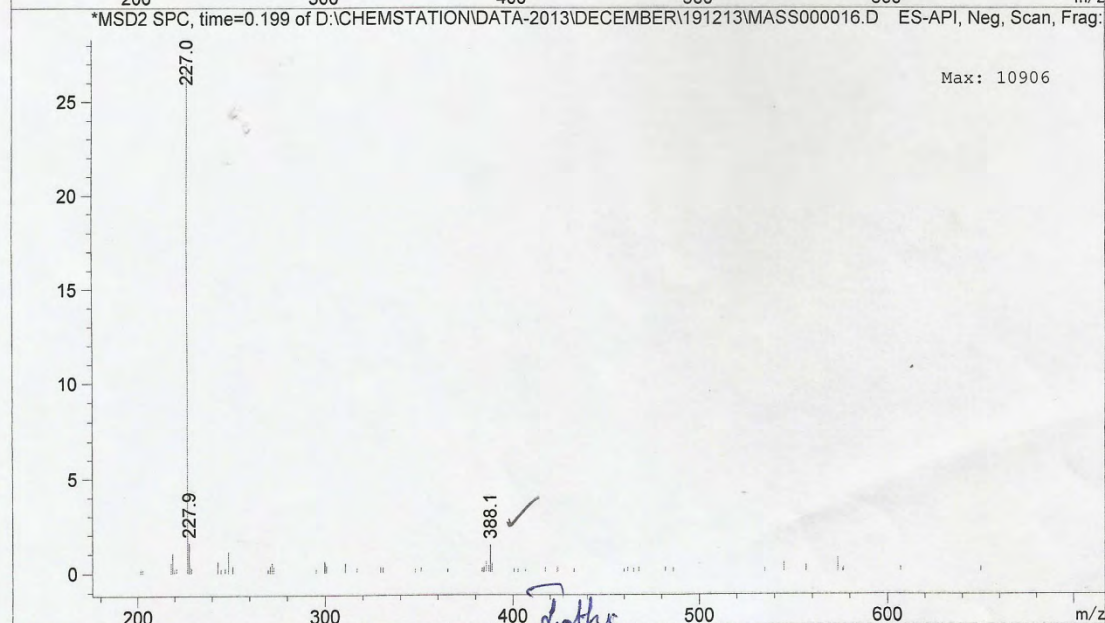

Print of window 80: MS Spectrum

Data File : D:\CHEMSTATION\DATA-2013\DECEMBER\191213\MASS000024.D  
Sample Name : 6 L

=====

|                 |                                   |                          |
|-----------------|-----------------------------------|--------------------------|
| Acq. Operator   | : Jyothi                          |                          |
| Acq. Instrument | : Instrument 1                    | Location : Vial 14       |
| Injection Date  | : 12/19/2013 4:22:24 PM           |                          |
|                 |                                   | Inj Volume : 5.000 µl    |
| Acq. Method     | : C:\CHEM32\1\METHODS\DIP         | MASS-ESI.M               |
| Last changed    | : 12/19/2013 3:33:08 PM by Jyothi | (modified after loading) |
| Analysis Method | : C:\CHEM32\1\METHODS\DIP         | MASS-ESI.M               |
| Last changed    | : 12/19/2013 4:12:55 PM by Jyothi | (modified after loading) |
| Sample Info     | :                                 |                          |

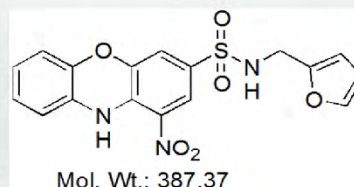

Additional Info : Peak(s) manually integrated

MS Spectrum

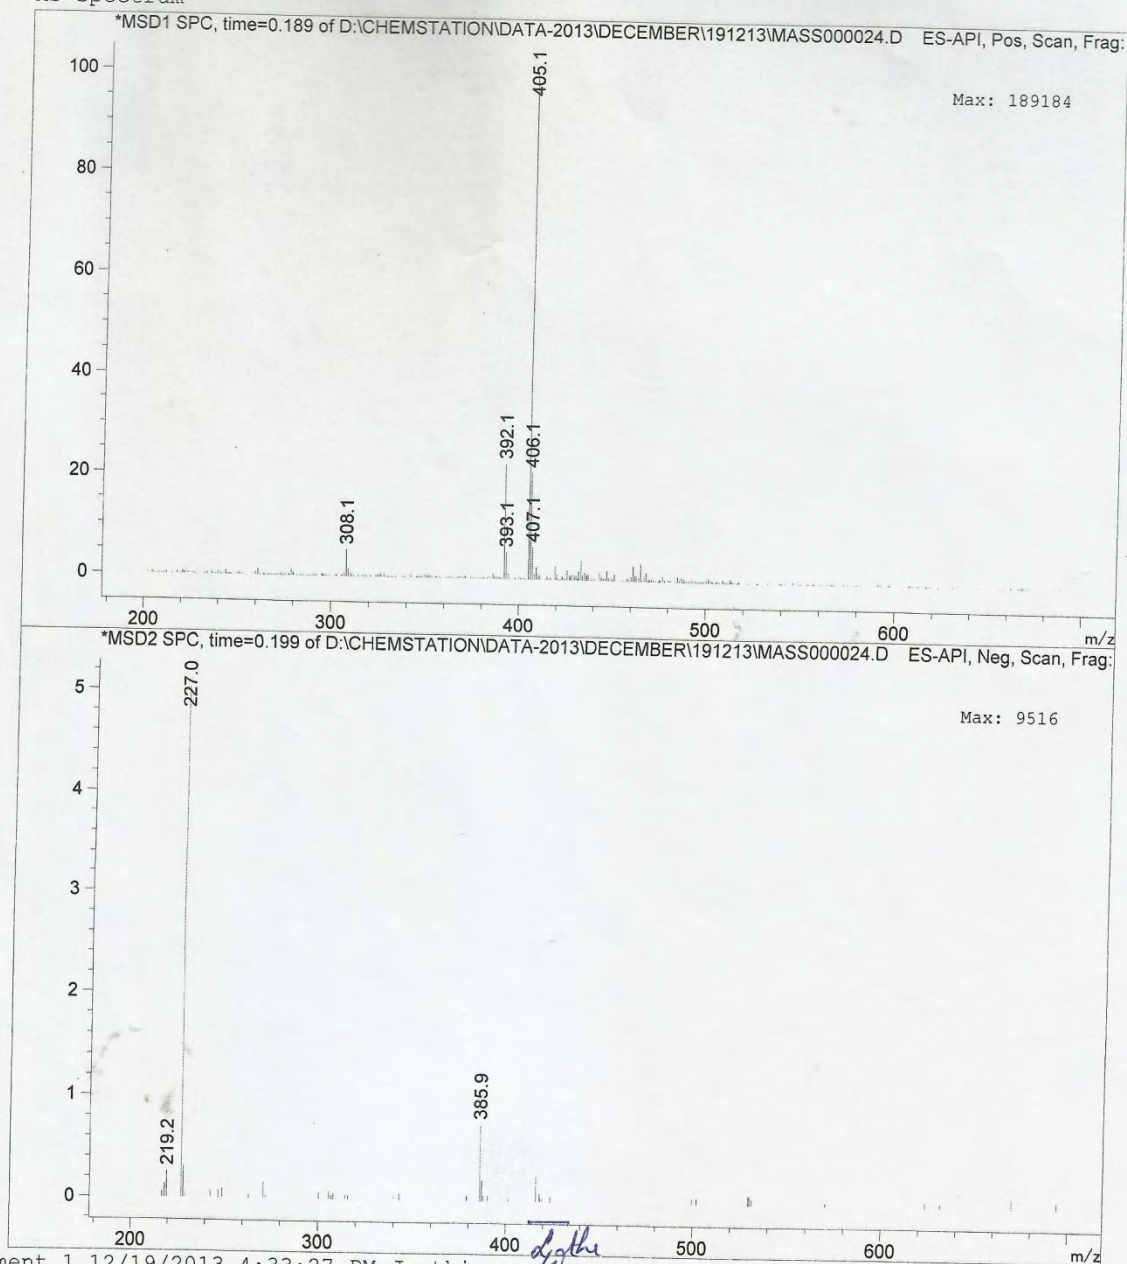

*Jyothi*  
19/12/13



Print of window 80: MS Spectrum

Data File : D:\CHEMSTATION\DATA-2013\DECEMBER\191213\MASS000011.D

Sample Name : 6m

=====

Acq. Operator : Jyothi  
 Acq. Instrument : Instrument 1 Location : Vial 1  
 Injection Date : 12/19/2013 3:24:17 PM Inj Volume : 2.000 µl

Acq. Method : C:\CHEM32\1\METHODS\DIP MASS-ESI.M  
 Last changed : 12/19/2013 3:23:12 PM by Jyothi  
 (modified after loading)

Analysis Method : C:\CHEM32\1\METHODS\DIP MASS-ESI.M  
 Last changed : 12/19/2013 4:12:55 PM by Jyothi  
 (modified after loading)

Sample Info :

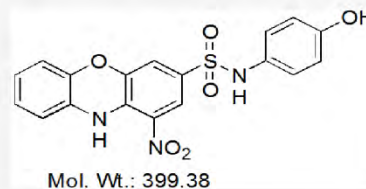

Additional Info : Peak(s) manually integrated

MS Spectrum

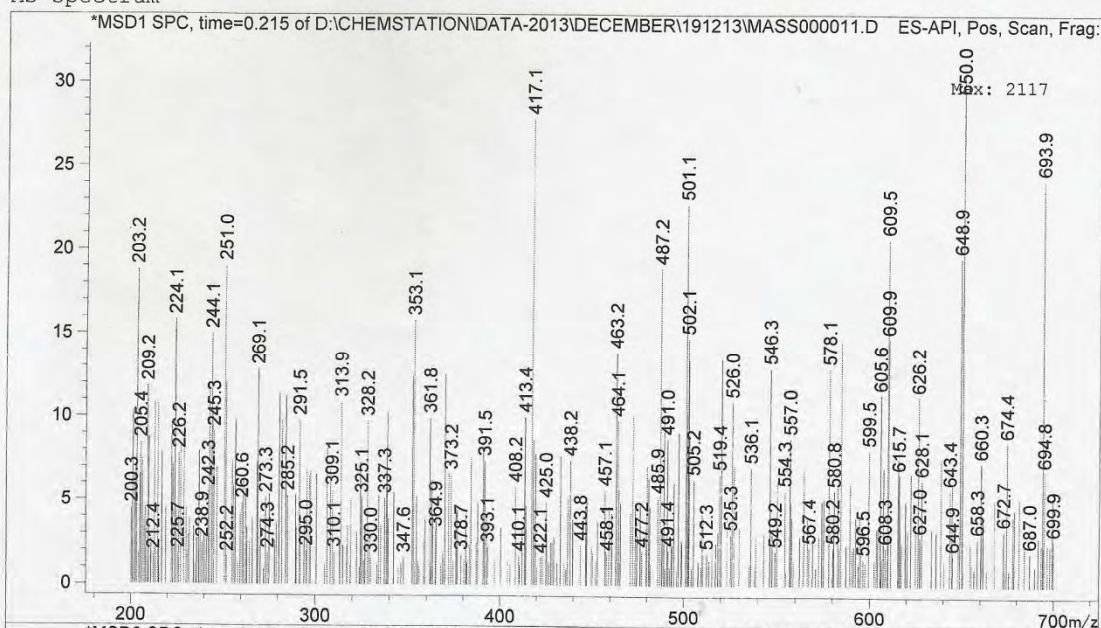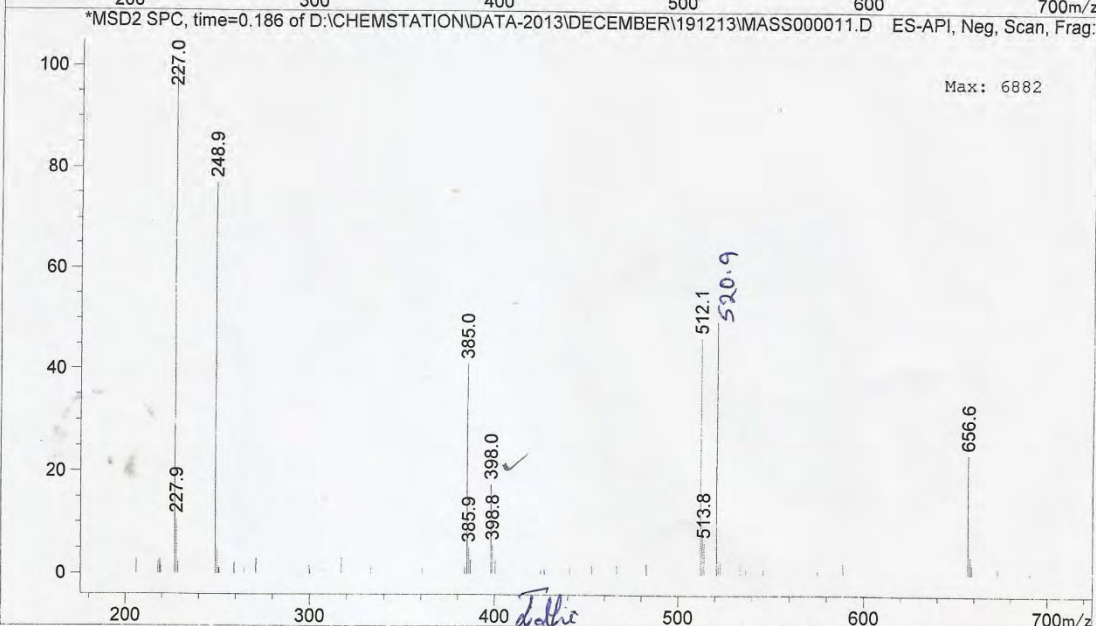

19/12/13

Print of window 80: MS Spectrum

Data File : D:\CHEMSTATION\DATA-2013\DECEMBER\191213\MASS000023.D

Sample Name : 6S

Acq. Operator : Jyothi

Acq. Instrument : Instrument 1

Location : Vial 13

Injection Date : 12/19/2013 4:20:52 PM

Inj Volume : 5.000 µl

Acq. Method : C:\CHEM32\1\METHODS\DIP MASS-ESI.M

Last changed : 12/19/2013 3:33:08 PM by Jyothi  
(modified after loading)

Analysis Method : C:\CHEM32\1\METHODS\DIP MASS-ESI.M

Last changed : 12/19/2013 4:12:55 PM by Jyothi  
(modified after loading)

Sample Info :

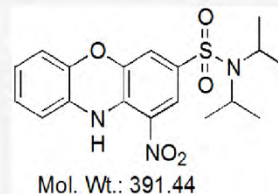

Additional Info : Peak(s) manually integrated

MS Spectrum

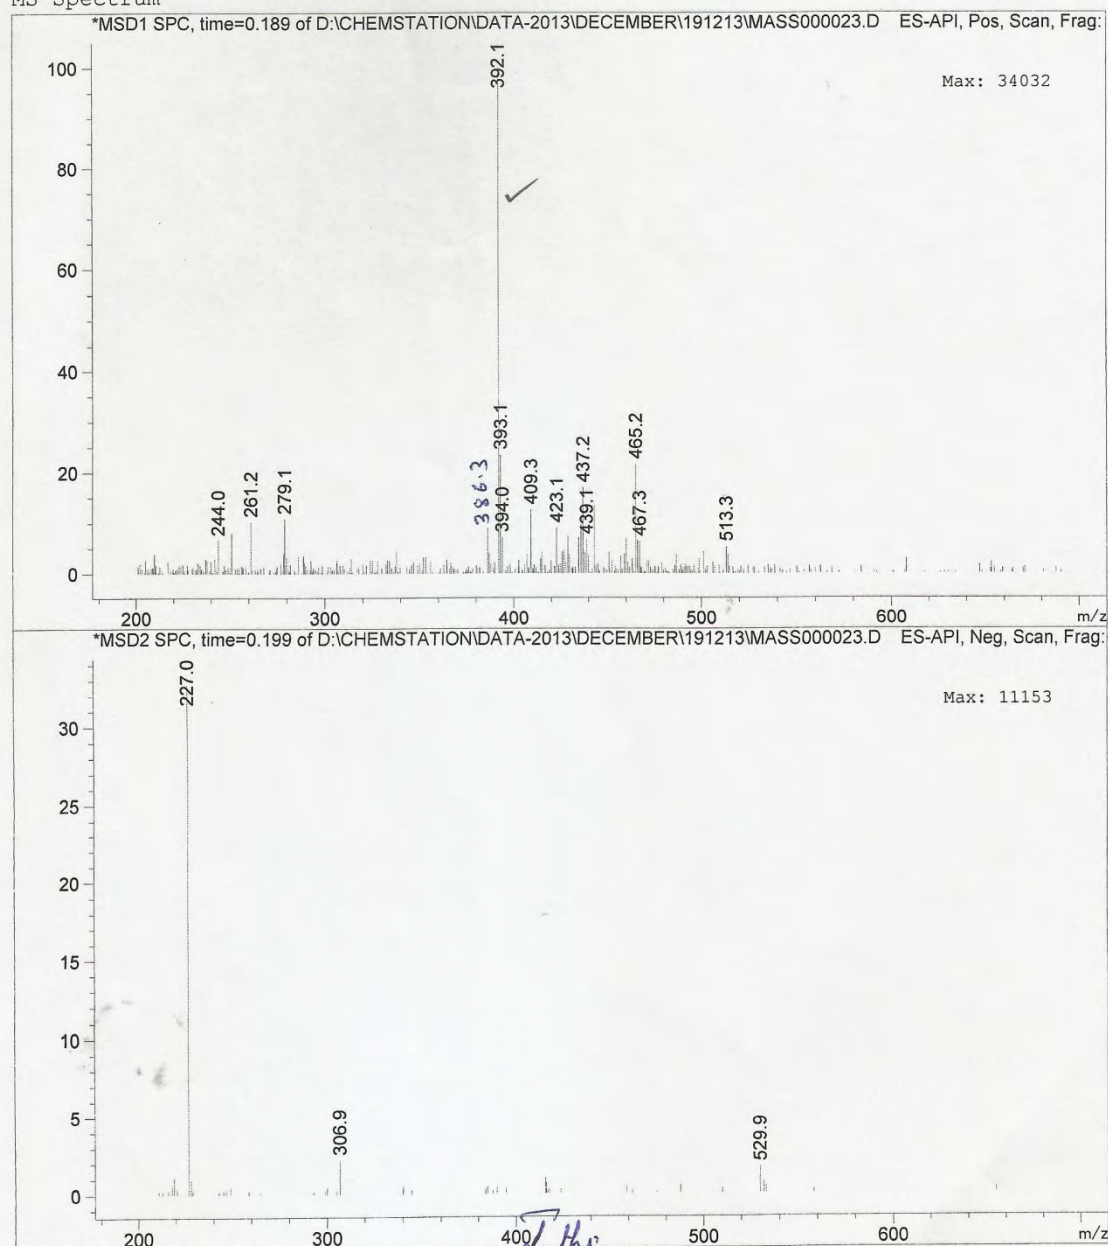



Data File : D:\CHEMSTATION\DATA-2013\DECEMBER\191213\MASS000015.D

Sample Name : 6t

=====

Acq. Operator : Jyothi  
 Acq. Instrument : Instrument 1 Location : Vial 5  
 Injection Date : 12/19/2013 3:57:07 PM Inj Volume : 5.000 µl

Acq. Method : C:\CHEM32\1\METHODS\DIP MASS-ESI.M  
 Last changed : 12/19/2013 3:33:08 PM by Jyothi  
 (modified after loading)

Analysis Method : C:\CHEM32\1\METHODS\DIP MASS-ESI.M  
 Last changed : 12/19/2013 4:12:55 PM by Jyothi  
 (modified after loading)

Sample Info :

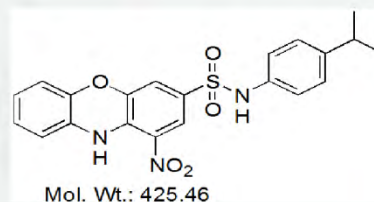

Additional Info : Peak(s) manually integrated

MS Spectrum

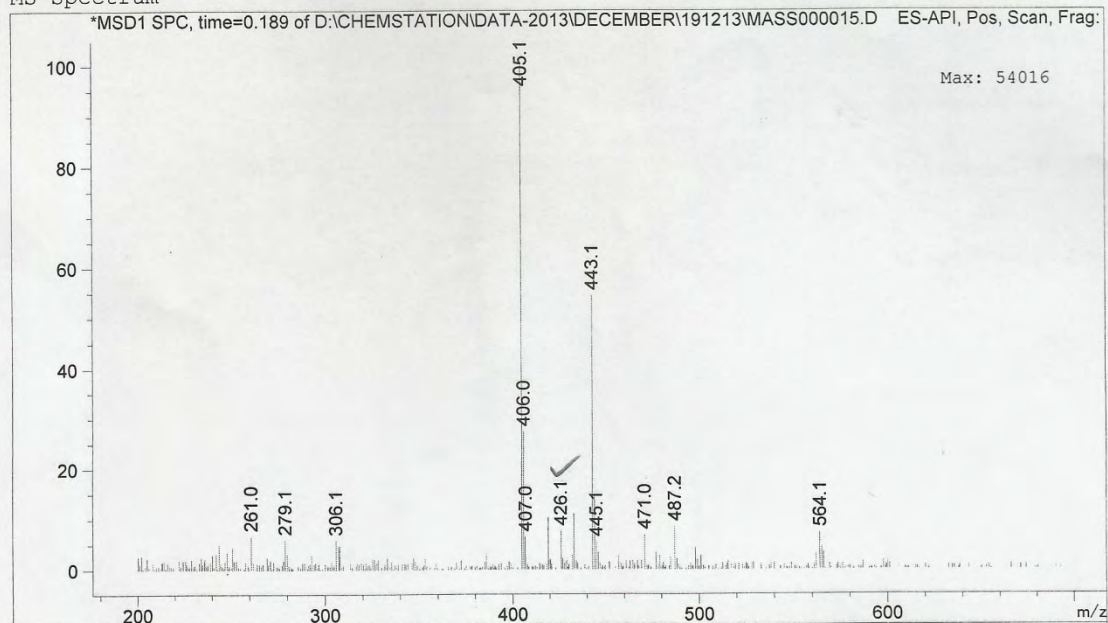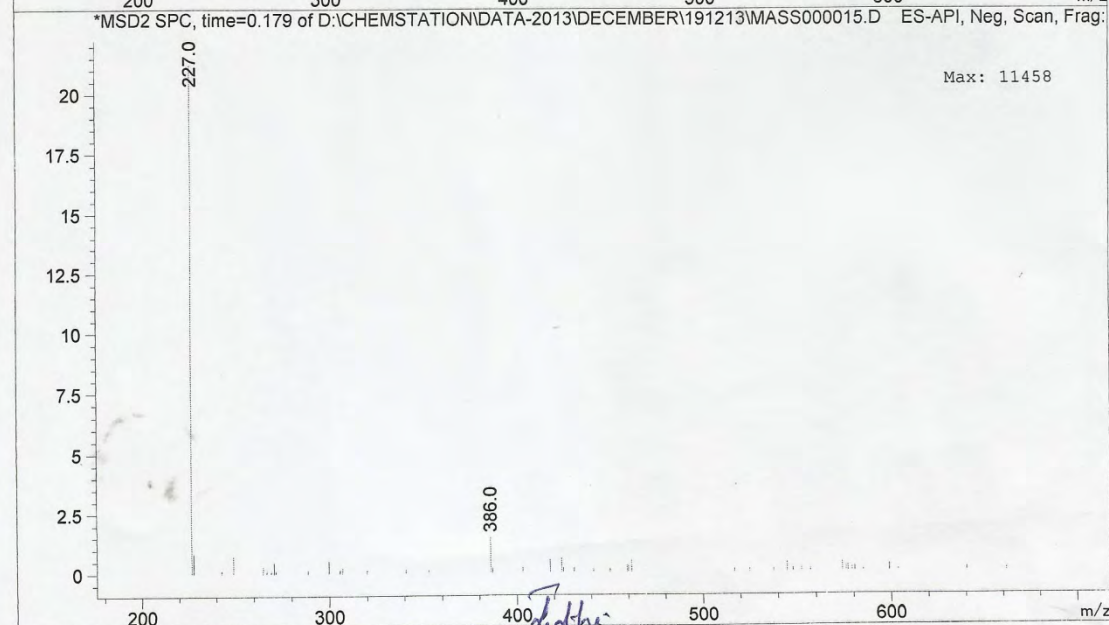

*Jyothi*  
19/12/13

Print of window 80: MS Spectrum

Data File : D:\CHEMSTATION\DATA-2013\DECEMBER\191213\MASS000026.D

Sample Name : 6u

Acq. Operator : Jyothi

Acq. Instrument : Instrument 1

Location : Vial 16

Injection Date : 12/19/2013 4:25:51 PM

Inj Volume : 5.000 µl

Acq. Method : C:\CHEM32\1\METHODS\DIP MASS-ESI.M

Last changed : 12/19/2013 3:33:08 PM by Jyothi  
(modified after loading)

Analysis Method : C:\CHEM32\1\METHODS\DIP MASS-ESI.M

Last changed : 12/19/2013 4:12:55 PM by Jyothi  
(modified after loading)

Sample Info :

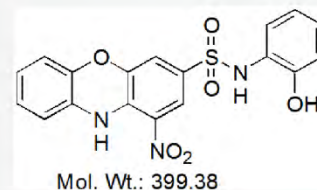

Additional Info : Peak(s) manually integrated

MS Spectrum

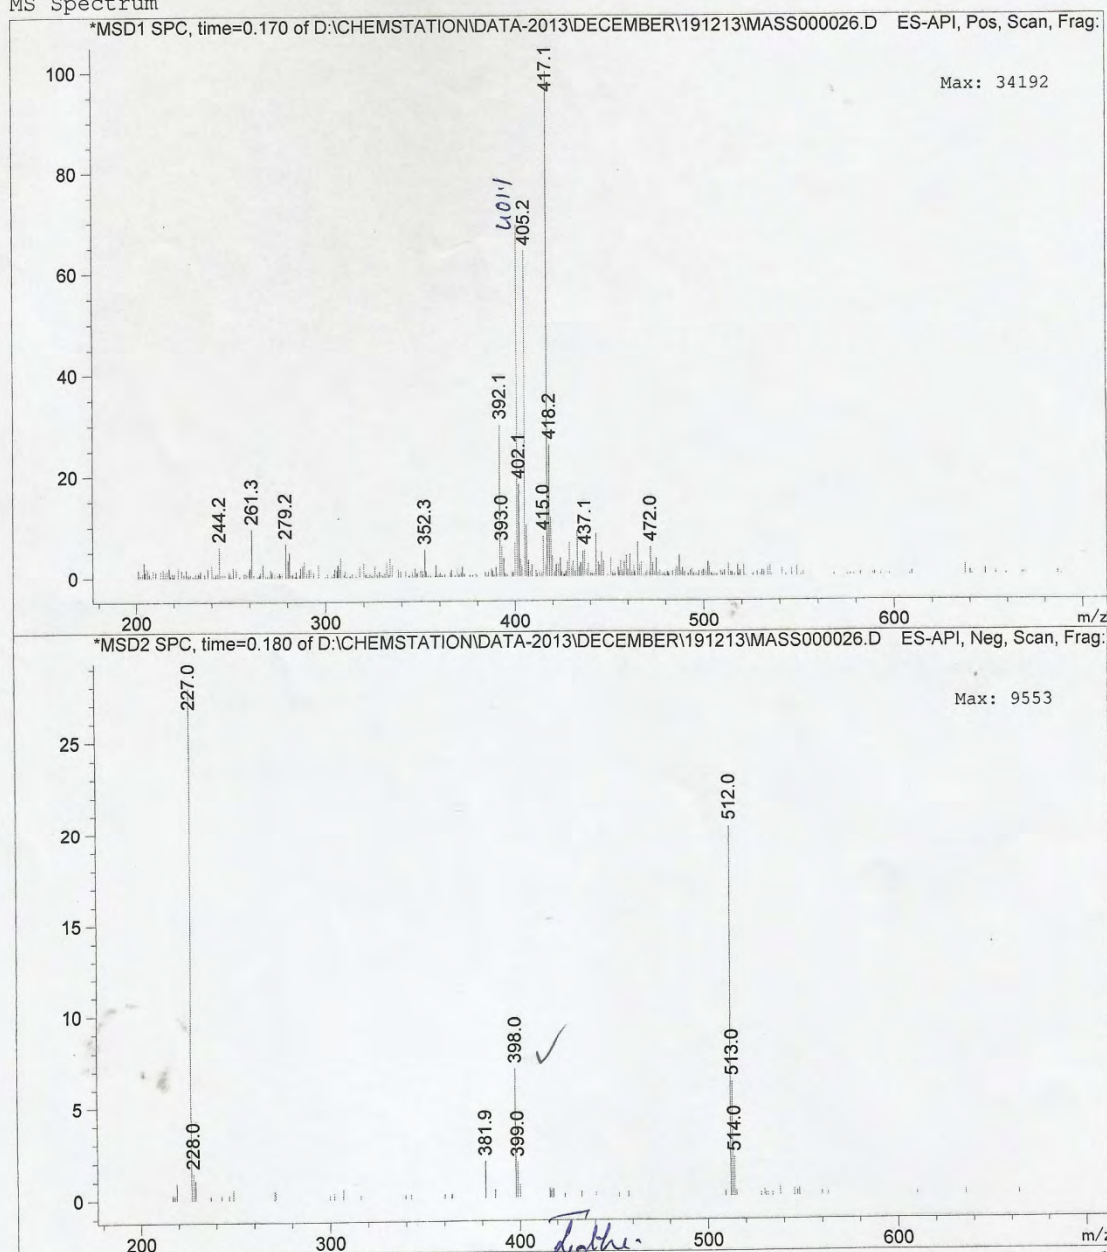

Instrument 1 12/19/2013 4:34:21 PM Jyothi

Page 1 of 1
